# Supplementary material
Source: publisher site journal article supplement (https://www.spandidos-publications.com/7144/downloadSupplementary)
Supplement: Supplementary file 1 [file downloadSupplementary]

## Sheet: Sheet1
Table SII. Analysis results of 486 metabolites and idiopathic pulmonary causality.
	id.exposure	id.outcome	outcome	exposure	method	nsnp	b	se	pval	lo_ci	up_ci	or	or_lci95	or_uci95
1	M00053	finn-b-IPF	Idiopathic pulmonary fibrosis || id:finn-b-IPF	exposure	MR Egger	8	6.32682	2.95587	0.0761057	0.533312	12.1203	559.373	1.70457	183565
2	M00053	finn-b-IPF	Idiopathic pulmonary fibrosis || id:finn-b-IPF	exposure	Weighted median	8	3.62352	2.30195	0.115463	-0.888311	8.13535	37.4691	0.41135	3413
3	M00053	finn-b-IPF	Idiopathic pulmonary fibrosis || id:finn-b-IPF	exposure	Inverse variance weighted	8	2.92913	1.76697	0.0973744	-0.534122	6.39238	18.7114	0.586184	597.278
4	M00053	finn-b-IPF	Idiopathic pulmonary fibrosis || id:finn-b-IPF	exposure	Simple mode	8	3.18691	3.22111	0.355435	-3.12647	9.50029	24.2135	0.0438724	13363.6
5	M00053	finn-b-IPF	Idiopathic pulmonary fibrosis || id:finn-b-IPF	exposure	Weighted mode	8	3.95957	2.25451	0.122464	-0.459274	8.37842	52.435	0.631742	4352.14
6	M00054	finn-b-IPF	Idiopathic pulmonary fibrosis || id:finn-b-IPF	exposure	MR Egger	148	0.613895	4.48713	0.891368	-8.18088	9.40867	1.84761	0.000279955	12193.6
7	M00054	finn-b-IPF	Idiopathic pulmonary fibrosis || id:finn-b-IPF	exposure	Weighted median	148	-0.120746	1.27727	0.924684	-2.62419	2.3827	0.886259	0.0724982	10.8341
8	M00054	finn-b-IPF	Idiopathic pulmonary fibrosis || id:finn-b-IPF	exposure	Inverse variance weighted	148	0.599536	0.857517	0.484456	-1.0812	2.28027	1.82127	0.339189	9.77931
9	M00054	finn-b-IPF	Idiopathic pulmonary fibrosis || id:finn-b-IPF	exposure	Simple mode	148	1.34447	3.4303	0.69567	-5.37891	8.06786	3.83617	0.00461283	3190.27
10	M00054	finn-b-IPF	Idiopathic pulmonary fibrosis || id:finn-b-IPF	exposure	Weighted mode	148	0.842035	2.87905	0.77034	-4.8009	6.48497	2.32108	0.00822236	655.218
11	M00059	finn-b-IPF	Idiopathic pulmonary fibrosis || id:finn-b-IPF	exposure	MR Egger	7	-2.10393	6.11466	0.744784	-14.0887	9.8808	0.121976	7.61e-07	19551.4
12	M00059	finn-b-IPF	Idiopathic pulmonary fibrosis || id:finn-b-IPF	exposure	Weighted median	7	0.197598	3.59611	0.95618	-6.85078	7.24598	1.21847	0.00105863	1402.45
13	M00059	finn-b-IPF	Idiopathic pulmonary fibrosis || id:finn-b-IPF	exposure	Inverse variance weighted	7	-1.56615	3.36979	0.642102	-8.17094	5.03864	0.208848	0.000282752	154.26
14	M00059	finn-b-IPF	Idiopathic pulmonary fibrosis || id:finn-b-IPF	exposure	Simple mode	7	1.12053	5.7549	0.852046	-10.1591	12.4001	3.06648	3.87e-05	242833
15	M00059	finn-b-IPF	Idiopathic pulmonary fibrosis || id:finn-b-IPF	exposure	Weighted mode	7	0.86602	5.69728	0.884165	-10.3006	12.0327	2.37743	3.36e-05	168163
16	M00060	finn-b-IPF	Idiopathic pulmonary fibrosis || id:finn-b-IPF	exposure	MR Egger	157	0.00656044	2.46925	0.997884	-4.83317	4.84629	1.00658	0.00796124	127.268
17	M00060	finn-b-IPF	Idiopathic pulmonary fibrosis || id:finn-b-IPF	exposure	Weighted median	157	-1.25174	1.49996	0.40399	-4.19167	1.68819	0.286006	0.015121	5.40965
18	M00060	finn-b-IPF	Idiopathic pulmonary fibrosis || id:finn-b-IPF	exposure	Inverse variance weighted	157	0.0801044	0.835185	0.92359	-1.55686	1.71707	1.0834	0.210797	5.56817
19	M00060	finn-b-IPF	Idiopathic pulmonary fibrosis || id:finn-b-IPF	exposure	Simple mode	157	5.04721	3.36739	0.135933	-1.55287	11.6473	155.588	0.21164	114381
20	M00060	finn-b-IPF	Idiopathic pulmonary fibrosis || id:finn-b-IPF	exposure	Weighted mode	157	-0.730159	2.05842	0.72328	-4.76466	3.30435	0.481833	0.00852576	27.2307
21	M00063	finn-b-IPF	Idiopathic pulmonary fibrosis || id:finn-b-IPF	exposure	MR Egger	44	-0.563002	2.44538	0.81903	-5.35595	4.22995	0.569497	0.00471998	68.7136
22	M00063	finn-b-IPF	Idiopathic pulmonary fibrosis || id:finn-b-IPF	exposure	Weighted median	44	-0.199428	1.32037	0.879944	-2.78735	2.38849	0.819199	0.0615841	10.8971
23	M00063	finn-b-IPF	Idiopathic pulmonary fibrosis || id:finn-b-IPF	exposure	Inverse variance weighted	44	-0.7425	0.8764	0.396875	-2.46024	0.975244	0.475923	0.0854142	2.65182
24	M00063	finn-b-IPF	Idiopathic pulmonary fibrosis || id:finn-b-IPF	exposure	Simple mode	44	0.244057	2.55346	0.924299	-4.76072	5.24883	1.27642	0.00855943	190.344
25	M00063	finn-b-IPF	Idiopathic pulmonary fibrosis || id:finn-b-IPF	exposure	Weighted mode	44	0.244057	2.34052	0.917436	-4.34336	4.83148	1.27642	0.0129928	125.396
26	M00064	finn-b-IPF	Idiopathic pulmonary fibrosis || id:finn-b-IPF	exposure	MR Egger	5	13.5974	7.43007	0.164661	-0.965533	28.1603	804040	0.38078	1697780000000
27	M00064	finn-b-IPF	Idiopathic pulmonary fibrosis || id:finn-b-IPF	exposure	Weighted median	5	1.48429	4.24603	0.726661	-6.83792	9.8065	4.41182	0.00107233	18151.3
28	M00064	finn-b-IPF	Idiopathic pulmonary fibrosis || id:finn-b-IPF	exposure	Inverse variance weighted	5	2.98695	3.77885	0.429271	-4.41959	10.3935	19.8252	0.0120391	32646.7
29	M00064	finn-b-IPF	Idiopathic pulmonary fibrosis || id:finn-b-IPF	exposure	Simple mode	5	0.777237	6.23967	0.906878	-11.4525	13.007	2.17545	1.06e-05	445515
30	M00064	finn-b-IPF	Idiopathic pulmonary fibrosis || id:finn-b-IPF	exposure	Weighted mode	5	1.12935	5.41247	0.844911	-9.4791	11.7378	3.09364	7.64e-05	125216
31	M00513	finn-b-IPF	Idiopathic pulmonary fibrosis || id:finn-b-IPF	exposure	MR Egger	25	0.41617	3.01716	0.891493	-5.49746	6.3298	1.51614	0.00409715	561.046
32	M00513	finn-b-IPF	Idiopathic pulmonary fibrosis || id:finn-b-IPF	exposure	Weighted median	25	-0.112171	1.93068	0.95367	-3.89631	3.67197	0.893892	0.0203168	39.3291
33	M00513	finn-b-IPF	Idiopathic pulmonary fibrosis || id:finn-b-IPF	exposure	Inverse variance weighted	25	0.220614	1.29461	0.864688	-2.31681	2.75804	1.24684	0.0985872	15.7689
34	M00513	finn-b-IPF	Idiopathic pulmonary fibrosis || id:finn-b-IPF	exposure	Simple mode	25	2.95511	3.32121	0.382423	-3.55447	9.46469	19.2038	0.0285965	12896.2
35	M00513	finn-b-IPF	Idiopathic pulmonary fibrosis || id:finn-b-IPF	exposure	Weighted mode	25	0.887885	2.39954	0.714611	-3.81522	5.59099	2.42998	0.0220329	268
36	M00527	finn-b-IPF	Idiopathic pulmonary fibrosis || id:finn-b-IPF	exposure	MR Egger	11	1.54983	3.71038	0.685955	-5.72251	8.82216	4.71066	0.00327149	6782.93
37	M00527	finn-b-IPF	Idiopathic pulmonary fibrosis || id:finn-b-IPF	exposure	Weighted median	11	-0.261856	1.62709	0.872145	-3.45096	2.92725	0.769622	0.0317152	18.6761
38	M00527	finn-b-IPF	Idiopathic pulmonary fibrosis || id:finn-b-IPF	exposure	Inverse variance weighted	11	-0.291731	1.23081	0.812639	-2.70412	2.12066	0.746969	0.0669289	8.33665
39	M00527	finn-b-IPF	Idiopathic pulmonary fibrosis || id:finn-b-IPF	exposure	Simple mode	11	-0.120442	2.80837	0.966636	-5.62485	5.38397	0.886529	0.0036071	217.885
40	M00527	finn-b-IPF	Idiopathic pulmonary fibrosis || id:finn-b-IPF	exposure	Weighted mode	11	-0.641272	2.65344	0.813915	-5.84202	4.55948	0.526622	0.00290297	95.5334
41	M00542	finn-b-IPF	Idiopathic pulmonary fibrosis || id:finn-b-IPF	exposure	MR Egger	10	-0.0991819	0.356292	0.787786	-0.797515	0.599151	0.905578	0.450447	1.82057
42	M00542	finn-b-IPF	Idiopathic pulmonary fibrosis || id:finn-b-IPF	exposure	Weighted median	10	-0.0905054	0.327481	0.782265	-0.732368	0.551357	0.913469	0.480769	1.73561
43	M00542	finn-b-IPF	Idiopathic pulmonary fibrosis || id:finn-b-IPF	exposure	Inverse variance weighted	10	-0.0433969	0.251637	0.863077	-0.536605	0.449811	0.957531	0.58473	1.56802
44	M00542	finn-b-IPF	Idiopathic pulmonary fibrosis || id:finn-b-IPF	exposure	Simple mode	10	-0.180509	0.485165	0.71846	-1.13143	0.770414	0.834845	0.322571	2.16066
45	M00542	finn-b-IPF	Idiopathic pulmonary fibrosis || id:finn-b-IPF	exposure	Weighted mode	10	-0.0969454	0.2934	0.748644	-0.672009	0.478118	0.907606	0.510682	1.61304
46	M00553	finn-b-IPF	Idiopathic pulmonary fibrosis || id:finn-b-IPF	exposure	MR Egger	15	0.258092	0.159993	0.130713	-0.055494	0.571678	1.29446	0.946018	1.77124
47	M00553	finn-b-IPF	Idiopathic pulmonary fibrosis || id:finn-b-IPF	exposure	Weighted median	15	0.14345	0.132176	0.27779	-0.115615	0.402515	1.15425	0.890818	1.49558
48	M00553	finn-b-IPF	Idiopathic pulmonary fibrosis || id:finn-b-IPF	exposure	Inverse variance weighted	15	0.187706	0.0947407	0.0475624	0.00201396	0.373397	1.20648	1.00202	1.45266
49	M00553	finn-b-IPF	Idiopathic pulmonary fibrosis || id:finn-b-IPF	exposure	Simple mode	15	0.226843	0.196002	0.266495	-0.157321	0.611008	1.25463	0.854429	1.84229
50	M00553	finn-b-IPF	Idiopathic pulmonary fibrosis || id:finn-b-IPF	exposure	Weighted mode	15	0.209462	0.148042	0.178958	-0.0806992	0.499624	1.23301	0.922471	1.6481
51	M00569	finn-b-IPF	Idiopathic pulmonary fibrosis || id:finn-b-IPF	exposure	MR Egger	11	-1.01827	1.21804	0.424799	-3.40562	1.36909	0.361221	0.0331863	3.93176
52	M00569	finn-b-IPF	Idiopathic pulmonary fibrosis || id:finn-b-IPF	exposure	Weighted median	11	0.0649317	0.352113	0.853695	-0.625209	0.755073	1.06709	0.535149	2.12777
53	M00569	finn-b-IPF	Idiopathic pulmonary fibrosis || id:finn-b-IPF	exposure	Inverse variance weighted	11	0.0781865	0.308245	0.799766	-0.525974	0.682347	1.08132	0.590979	1.97852
54	M00569	finn-b-IPF	Idiopathic pulmonary fibrosis || id:finn-b-IPF	exposure	Simple mode	11	0.171796	0.547743	0.760237	-0.901781	1.24537	1.18744	0.405846	3.47423
55	M00569	finn-b-IPF	Idiopathic pulmonary fibrosis || id:finn-b-IPF	exposure	Weighted mode	11	0.0219669	0.477744	0.964231	-0.914412	0.958346	1.02221	0.400752	2.60738
56	M00575	finn-b-IPF	Idiopathic pulmonary fibrosis || id:finn-b-IPF	exposure	MR Egger	5	-0.286352	0.851485	0.758796	-1.95526	1.38256	0.750998	0.141527	3.98509
57	M00575	finn-b-IPF	Idiopathic pulmonary fibrosis || id:finn-b-IPF	exposure	Weighted median	5	0.177499	0.511252	0.728453	-0.824555	1.17955	1.19423	0.43843	3.25292
58	M00575	finn-b-IPF	Idiopathic pulmonary fibrosis || id:finn-b-IPF	exposure	Inverse variance weighted	5	0.111227	0.466443	0.811526	-0.803001	1.02545	1.11765	0.447983	2.78836
59	M00575	finn-b-IPF	Idiopathic pulmonary fibrosis || id:finn-b-IPF	exposure	Simple mode	5	0.570013	0.887376	0.555607	-1.16924	2.30927	1.76829	0.310602	10.0671
60	M00575	finn-b-IPF	Idiopathic pulmonary fibrosis || id:finn-b-IPF	exposure	Weighted mode	5	0.145784	0.481714	0.777253	-0.798377	1.08994	1.15695	0.450059	2.97411
61	M00577	finn-b-IPF	Idiopathic pulmonary fibrosis || id:finn-b-IPF	exposure	MR Egger	3	3.79586	5.40383	0.610159	-6.79565	14.3874	44.5167	0.00111863	1.77157e+06
62	M00577	finn-b-IPF	Idiopathic pulmonary fibrosis || id:finn-b-IPF	exposure	Weighted median	3	-2.09554	1.96165	0.285405	-5.94037	1.74929	0.123004	0.00263106	5.7505
63	M00577	finn-b-IPF	Idiopathic pulmonary fibrosis || id:finn-b-IPF	exposure	Inverse variance weighted	3	-2.05097	1.56477	0.189955	-5.11792	1.01599	0.128611	0.00598847	2.76209
64	M00577	finn-b-IPF	Idiopathic pulmonary fibrosis || id:finn-b-IPF	exposure	Simple mode	3	-2.64283	2.45762	0.394716	-7.45976	2.17409	0.0711593	0.000575793	8.79422
65	M00577	finn-b-IPF	Idiopathic pulmonary fibrosis || id:finn-b-IPF	exposure	Weighted mode	3	-2.73035	2.37139	0.36864	-7.37828	1.91758	0.0651962	0.000624672	6.80444
66	M00584	finn-b-IPF	Idiopathic pulmonary fibrosis || id:finn-b-IPF	exposure	MR Egger	18	-0.290905	1.49652	0.84832	-3.22409	2.64228	0.747587	0.0397919	14.0452
67	M00584	finn-b-IPF	Idiopathic pulmonary fibrosis || id:finn-b-IPF	exposure	Weighted median	18	0.391378	0.998817	0.695175	-1.5663	2.34906	1.47902	0.208816	10.4757
68	M00584	finn-b-IPF	Idiopathic pulmonary fibrosis || id:finn-b-IPF	exposure	Inverse variance weighted	18	0.629318	0.700074	0.36869	-0.742828	2.00146	1.87633	0.475767	7.39988
69	M00584	finn-b-IPF	Idiopathic pulmonary fibrosis || id:finn-b-IPF	exposure	Simple mode	18	1.56095	1.71645	0.375851	-1.8033	4.9252	4.76334	0.164754	137.717
70	M00584	finn-b-IPF	Idiopathic pulmonary fibrosis || id:finn-b-IPF	exposure	Weighted mode	18	0.606598	0.976756	0.542816	-1.30784	2.52104	1.83418	0.270402	12.4415
71	M00599	finn-b-IPF	Idiopathic pulmonary fibrosis || id:finn-b-IPF	exposure	MR Egger	14	-0.260604	1.99363	0.898164	-4.16812	3.64691	0.770586	0.0154814	38.3559
72	M00599	finn-b-IPF	Idiopathic pulmonary fibrosis || id:finn-b-IPF	exposure	Weighted median	14	-0.471238	0.893757	0.598016	-2.223	1.28053	0.624229	0.108284	3.59853
73	M00599	finn-b-IPF	Idiopathic pulmonary fibrosis || id:finn-b-IPF	exposure	Inverse variance weighted	14	-0.357856	0.651498	0.582812	-1.63479	0.91908	0.699174	0.194993	2.50698
74	M00599	finn-b-IPF	Idiopathic pulmonary fibrosis || id:finn-b-IPF	exposure	Simple mode	14	-0.577133	1.43134	0.693345	-3.38256	2.22829	0.561506	0.0339605	9.28398
75	M00599	finn-b-IPF	Idiopathic pulmonary fibrosis || id:finn-b-IPF	exposure	Weighted mode	14	-0.610035	1.14731	0.603895	-2.85876	1.63869	0.543332	0.0573398	5.14842
76	M00606	finn-b-IPF	Idiopathic pulmonary fibrosis || id:finn-b-IPF	exposure	MR Egger	20	-6.10548	4.00194	0.144481	-13.9493	1.73832	0.00223062	8.75e-07	5.68779
77	M00606	finn-b-IPF	Idiopathic pulmonary fibrosis || id:finn-b-IPF	exposure	Weighted median	20	-1.95412	1.91719	0.30808	-5.71181	1.80358	0.14169	0.00330667	6.07134
78	M00606	finn-b-IPF	Idiopathic pulmonary fibrosis || id:finn-b-IPF	exposure	Inverse variance weighted	20	-1.75134	1.3375	0.190393	-4.37284	0.870152	0.173541	0.0126154	2.38727
79	M00606	finn-b-IPF	Idiopathic pulmonary fibrosis || id:finn-b-IPF	exposure	Simple mode	20	-2.63583	3.42069	0.450447	-9.34038	4.06872	0.0716595	8.78e-05	58.4819
80	M00606	finn-b-IPF	Idiopathic pulmonary fibrosis || id:finn-b-IPF	exposure	Weighted mode	20	-3.1288	2.81591	0.280383	-8.64799	2.39039	0.0437703	0.00017548	10.9177
81	M01105	finn-b-IPF	Idiopathic pulmonary fibrosis || id:finn-b-IPF	exposure	MR Egger	17	0.495354	3.86891	0.899822	-7.08771	8.07841	1.64108	0.000835312	3224.12
82	M01105	finn-b-IPF	Idiopathic pulmonary fibrosis || id:finn-b-IPF	exposure	Weighted median	17	-0.124357	1.32704	0.92534	-2.72535	2.47664	0.883065	0.0655231	11.9012
83	M01105	finn-b-IPF	Idiopathic pulmonary fibrosis || id:finn-b-IPF	exposure	Inverse variance weighted	17	-0.751796	1.01053	0.4569	-2.73244	1.22885	0.471519	0.0650605	3.41728
84	M01105	finn-b-IPF	Idiopathic pulmonary fibrosis || id:finn-b-IPF	exposure	Simple mode	17	0.241742	2.05816	0.907961	-3.79225	4.27574	1.27347	0.0225448	71.9331
85	M01105	finn-b-IPF	Idiopathic pulmonary fibrosis || id:finn-b-IPF	exposure	Weighted mode	17	0.103426	2.06334	0.960643	-3.94072	4.14758	1.10896	0.0194342	63.2804
86	M01107	finn-b-IPF	Idiopathic pulmonary fibrosis || id:finn-b-IPF	exposure	MR Egger	19	1.05686	1.04791	0.327336	-0.997045	3.11076	2.87731	0.368968	22.438
87	M01107	finn-b-IPF	Idiopathic pulmonary fibrosis || id:finn-b-IPF	exposure	Weighted median	19	0.77492	0.637593	0.22422	-0.474763	2.0246	2.17042	0.622033	7.5731
88	M01107	finn-b-IPF	Idiopathic pulmonary fibrosis || id:finn-b-IPF	exposure	Inverse variance weighted	19	0.236794	0.464459	0.610173	-0.673546	1.14713	1.26718	0.509897	3.14915
89	M01107	finn-b-IPF	Idiopathic pulmonary fibrosis || id:finn-b-IPF	exposure	Simple mode	19	1.10139	1.02822	0.298249	-0.913918	3.1167	3.00835	0.40095	22.5718
90	M01107	finn-b-IPF	Idiopathic pulmonary fibrosis || id:finn-b-IPF	exposure	Weighted mode	19	0.849753	0.757271	0.276555	-0.634498	2.334	2.33907	0.530201	10.3192
91	M01110	finn-b-IPF	Idiopathic pulmonary fibrosis || id:finn-b-IPF	exposure	MR Egger	21	-0.479741	1.24515	0.704303	-2.92023	1.96074	0.618944	0.0539215	7.10461
92	M01110	finn-b-IPF	Idiopathic pulmonary fibrosis || id:finn-b-IPF	exposure	Weighted median	21	0.205775	0.875972	0.814279	-1.51113	1.92268	1.22848	0.22066	6.83926
93	M01110	finn-b-IPF	Idiopathic pulmonary fibrosis || id:finn-b-IPF	exposure	Inverse variance weighted	21	0.468379	0.745009	0.529552	-0.991838	1.9286	1.5974	0.370894	6.87985
94	M01110	finn-b-IPF	Idiopathic pulmonary fibrosis || id:finn-b-IPF	exposure	Simple mode	21	0.711882	1.9008	0.711961	-3.01368	4.43745	2.03782	0.0491105	84.5588
95	M01110	finn-b-IPF	Idiopathic pulmonary fibrosis || id:finn-b-IPF	exposure	Weighted mode	21	0.229666	0.88715	0.798373	-1.50915	1.96848	1.25818	0.221098	7.15979
96	M01114	finn-b-IPF	Idiopathic pulmonary fibrosis || id:finn-b-IPF	exposure	MR Egger	17	-0.0201835	0.932704	0.983021	-1.84828	1.80792	0.980019	0.157507	6.09773
97	M01114	finn-b-IPF	Idiopathic pulmonary fibrosis || id:finn-b-IPF	exposure	Weighted median	17	-0.125629	0.442372	0.776418	-0.992679	0.741421	0.881942	0.370583	2.09892
98	M01114	finn-b-IPF	Idiopathic pulmonary fibrosis || id:finn-b-IPF	exposure	Inverse variance weighted	17	-0.253452	0.387029	0.512554	-1.01203	0.505125	0.776117	0.363481	1.65719
99	M01114	finn-b-IPF	Idiopathic pulmonary fibrosis || id:finn-b-IPF	exposure	Simple mode	17	-0.122501	0.669917	0.857205	-1.43554	1.19054	0.884705	0.237987	3.28885
100	M01114	finn-b-IPF	Idiopathic pulmonary fibrosis || id:finn-b-IPF	exposure	Weighted mode	17	-0.122501	0.507195	0.812215	-1.1166	0.8716	0.884705	0.32739	2.39073
101	M01121	finn-b-IPF	Idiopathic pulmonary fibrosis || id:finn-b-IPF	exposure	MR Egger	7	-5.11619	3.71248	0.226649	-12.3926	2.16027	0.00599885	4.15e-06	8.67346
102	M01121	finn-b-IPF	Idiopathic pulmonary fibrosis || id:finn-b-IPF	exposure	Weighted median	7	-2.31336	1.52186	0.128489	-5.29621	0.669484	0.0989281	0.00501056	1.95323
103	M01121	finn-b-IPF	Idiopathic pulmonary fibrosis || id:finn-b-IPF	exposure	Inverse variance weighted	7	-1.69331	1.12799	0.133311	-3.90416	0.517554	0.183911	0.0201578	1.67792
104	M01121	finn-b-IPF	Idiopathic pulmonary fibrosis || id:finn-b-IPF	exposure	Simple mode	7	0.628962	2.17919	0.782583	-3.64226	4.90018	1.87566	0.0261932	134.314
105	M01121	finn-b-IPF	Idiopathic pulmonary fibrosis || id:finn-b-IPF	exposure	Weighted mode	7	-3.26316	2.14239	0.178555	-7.46225	0.935923	0.0382672	0.000574363	2.54957
106	M01123	finn-b-IPF	Idiopathic pulmonary fibrosis || id:finn-b-IPF	exposure	MR Egger	10	0.133282	0.25802	0.619437	-0.372437	0.639002	1.14257	0.689053	1.89459
107	M01123	finn-b-IPF	Idiopathic pulmonary fibrosis || id:finn-b-IPF	exposure	Weighted median	10	0.115344	0.205129	0.573913	-0.286709	0.517397	1.12226	0.75073	1.67765
108	M01123	finn-b-IPF	Idiopathic pulmonary fibrosis || id:finn-b-IPF	exposure	Inverse variance weighted	10	-0.03305	0.181228	0.855295	-0.388257	0.322157	0.96749	0.678238	1.3801
109	M01123	finn-b-IPF	Idiopathic pulmonary fibrosis || id:finn-b-IPF	exposure	Simple mode	10	0.158935	0.334376	0.645883	-0.496441	0.814312	1.17226	0.608693	2.25762
110	M01123	finn-b-IPF	Idiopathic pulmonary fibrosis || id:finn-b-IPF	exposure	Weighted mode	10	0.129921	0.19835	0.528847	-0.258846	0.518688	1.13874	0.771942	1.67982
111	M01125	finn-b-IPF	Idiopathic pulmonary fibrosis || id:finn-b-IPF	exposure	MR Egger	17	-0.453009	3.24373	0.890789	-6.81071	5.90469	0.635713	0.00110191	366.755
112	M01125	finn-b-IPF	Idiopathic pulmonary fibrosis || id:finn-b-IPF	exposure	Weighted median	17	0.91632	1.89319	0.628379	-2.79433	4.62697	2.50007	0.061156	102.204
113	M01125	finn-b-IPF	Idiopathic pulmonary fibrosis || id:finn-b-IPF	exposure	Inverse variance weighted	17	0.93748	1.41322	0.507097	-1.83243	3.70739	2.55354	0.160025	40.7472
114	M01125	finn-b-IPF	Idiopathic pulmonary fibrosis || id:finn-b-IPF	exposure	Simple mode	17	1.02732	2.78927	0.717469	-4.43965	6.49429	2.79356	0.0118001	661.353
115	M01125	finn-b-IPF	Idiopathic pulmonary fibrosis || id:finn-b-IPF	exposure	Weighted mode	17	0.616188	2.33228	0.794999	-3.95507	5.18745	1.85185	0.0191573	179.011
116	M01284	finn-b-IPF	Idiopathic pulmonary fibrosis || id:finn-b-IPF	exposure	MR Egger	19	-2.26949	3.65632	0.543027	-9.43587	4.89689	0.103365	7.98e-05	133.873
117	M01284	finn-b-IPF	Idiopathic pulmonary fibrosis || id:finn-b-IPF	exposure	Weighted median	19	-0.339706	1.25866	0.787241	-2.80668	2.12727	0.711979	0.0604051	8.39192
118	M01284	finn-b-IPF	Idiopathic pulmonary fibrosis || id:finn-b-IPF	exposure	Inverse variance weighted	19	0.470541	0.958997	0.623667	-1.40909	2.35017	1.60086	0.244365	10.4874
119	M01284	finn-b-IPF	Idiopathic pulmonary fibrosis || id:finn-b-IPF	exposure	Simple mode	19	-0.814245	2.29051	0.726357	-5.30365	3.67516	0.442974	0.00497343	39.4548
120	M01284	finn-b-IPF	Idiopathic pulmonary fibrosis || id:finn-b-IPF	exposure	Weighted mode	19	-1.24261	2.10256	0.561871	-5.36363	2.87842	0.288631	0.00468387	17.7861
121	M01299	finn-b-IPF	Idiopathic pulmonary fibrosis || id:finn-b-IPF	exposure	MR Egger	31	-0.541844	4.78372	0.910598	-9.91794	8.83426	0.581675	4.93e-05	6865.44
122	M01299	finn-b-IPF	Idiopathic pulmonary fibrosis || id:finn-b-IPF	exposure	Weighted median	31	1.88746	1.57241	0.229999	-1.19447	4.96939	6.60259	0.302866	143.939
123	M01299	finn-b-IPF	Idiopathic pulmonary fibrosis || id:finn-b-IPF	exposure	Inverse variance weighted	31	0.482115	1.14306	0.673189	-1.75829	2.72252	1.6195	0.17234	15.2186
124	M01299	finn-b-IPF	Idiopathic pulmonary fibrosis || id:finn-b-IPF	exposure	Simple mode	31	1.52598	2.89337	0.601791	-4.14503	7.19699	4.59966	0.015843	1335.41
125	M01299	finn-b-IPF	Idiopathic pulmonary fibrosis || id:finn-b-IPF	exposure	Weighted mode	31	2.2662	2.44162	0.360735	-2.51937	7.05177	9.64268	0.0805103	1154.9
126	M01301	finn-b-IPF	Idiopathic pulmonary fibrosis || id:finn-b-IPF	exposure	MR Egger	22	3.84573	8.22221	0.645038	-12.2698	19.9613	46.793	4.69e-06	4.66731e+08
127	M01301	finn-b-IPF	Idiopathic pulmonary fibrosis || id:finn-b-IPF	exposure	Weighted median	22	-1.4119	2.10378	0.502141	-5.53532	2.71151	0.243679	0.00394496	15.052
128	M01301	finn-b-IPF	Idiopathic pulmonary fibrosis || id:finn-b-IPF	exposure	Inverse variance weighted	22	-1.46351	1.70705	0.391262	-4.80933	1.88231	0.231423	0.00815335	6.56867
129	M01301	finn-b-IPF	Idiopathic pulmonary fibrosis || id:finn-b-IPF	exposure	Simple mode	22	-1.069	3.85066	0.784023	-8.61629	6.47829	0.343352	0.00018113	650.859
130	M01301	finn-b-IPF	Idiopathic pulmonary fibrosis || id:finn-b-IPF	exposure	Weighted mode	22	-1.51	2.7055	0.582663	-6.81279	3.79279	0.220909	0.00109962	44.3799
131	M01302	finn-b-IPF	Idiopathic pulmonary fibrosis || id:finn-b-IPF	exposure	MR Egger	21	1.31722	5.91141	0.826048	-10.2691	12.9036	3.73302	3.47e-05	401746
132	M01302	finn-b-IPF	Idiopathic pulmonary fibrosis || id:finn-b-IPF	exposure	Weighted median	21	-0.324942	2.3928	0.89198	-5.01484	4.36495	0.722569	0.00663872	78.6456
133	M01302	finn-b-IPF	Idiopathic pulmonary fibrosis || id:finn-b-IPF	exposure	Inverse variance weighted	21	-1.06412	1.65321	0.519789	-4.30442	2.17617	0.34503	0.0135087	8.81251
134	M01302	finn-b-IPF	Idiopathic pulmonary fibrosis || id:finn-b-IPF	exposure	Simple mode	21	0.256209	4.25544	0.952588	-8.08446	8.59688	1.29202	0.000308292	5414.74
135	M01302	finn-b-IPF	Idiopathic pulmonary fibrosis || id:finn-b-IPF	exposure	Weighted mode	21	1.14745	4.03218	0.778897	-6.75562	9.05052	3.15014	0.00116432	8522.93
136	M01303	finn-b-IPF	Idiopathic pulmonary fibrosis || id:finn-b-IPF	exposure	MR Egger	17	1.77708	3.36135	0.604764	-4.81118	8.36533	5.91254	0.00813826	4295.53
137	M01303	finn-b-IPF	Idiopathic pulmonary fibrosis || id:finn-b-IPF	exposure	Weighted median	17	-1.34685	1.25401	0.282808	-3.8047	1.11101	0.260059	0.0222659	3.03742
138	M01303	finn-b-IPF	Idiopathic pulmonary fibrosis || id:finn-b-IPF	exposure	Inverse variance weighted	17	-0.533248	0.883087	0.545947	-2.2641	1.1976	0.586696	0.103924	3.31217
139	M01303	finn-b-IPF	Idiopathic pulmonary fibrosis || id:finn-b-IPF	exposure	Simple mode	17	-1.63755	2.31391	0.489314	-6.17281	2.89771	0.194456	0.00208536	18.1326
140	M01303	finn-b-IPF	Idiopathic pulmonary fibrosis || id:finn-b-IPF	exposure	Weighted mode	17	-1.52969	2.17591	0.49215	-5.79447	2.73508	0.216602	0.00304434	15.411
141	M01336	finn-b-IPF	Idiopathic pulmonary fibrosis || id:finn-b-IPF	exposure	MR Egger	28	1.0736	2.50156	0.671334	-3.82947	5.97666	2.92589	0.0217212	394.123
142	M01336	finn-b-IPF	Idiopathic pulmonary fibrosis || id:finn-b-IPF	exposure	Weighted median	28	-0.678639	1.47427	0.645285	-3.56821	2.21093	0.507307	0.0282063	9.12421
143	M01336	finn-b-IPF	Idiopathic pulmonary fibrosis || id:finn-b-IPF	exposure	Inverse variance weighted	28	-0.637928	1.06958	0.550888	-2.7343	1.45844	0.528386	0.0649395	4.29926
144	M01336	finn-b-IPF	Idiopathic pulmonary fibrosis || id:finn-b-IPF	exposure	Simple mode	28	-1.48211	2.59859	0.573157	-6.57535	3.61114	0.227159	0.00139431	37.0081
145	M01336	finn-b-IPF	Idiopathic pulmonary fibrosis || id:finn-b-IPF	exposure	Weighted mode	28	-0.701031	1.90853	0.716248	-4.44174	3.03968	0.496074	0.0117754	20.8986
146	M01356	finn-b-IPF	Idiopathic pulmonary fibrosis || id:finn-b-IPF	exposure	MR Egger	15	-0.616583	1.51286	0.690227	-3.58178	2.34862	0.539786	0.027826	10.4711
147	M01356	finn-b-IPF	Idiopathic pulmonary fibrosis || id:finn-b-IPF	exposure	Weighted median	15	-0.642107	1.0974	0.55847	-2.79301	1.5088	0.526183	0.0612364	4.5213
148	M01356	finn-b-IPF	Idiopathic pulmonary fibrosis || id:finn-b-IPF	exposure	Inverse variance weighted	15	-1.08946	0.784762	0.165054	-2.6276	0.448669	0.336397	0.0722519	1.56623
149	M01356	finn-b-IPF	Idiopathic pulmonary fibrosis || id:finn-b-IPF	exposure	Simple mode	15	-0.631191	1.5306	0.686305	-3.63117	2.36879	0.531958	0.0264852	10.6844
150	M01356	finn-b-IPF	Idiopathic pulmonary fibrosis || id:finn-b-IPF	exposure	Weighted mode	15	-0.702866	1.2802	0.591635	-3.21206	1.80632	0.495164	0.0402737	6.08802
151	M01358	finn-b-IPF	Idiopathic pulmonary fibrosis || id:finn-b-IPF	exposure	MR Egger	42	-4.49577	2.16956	0.0447355	-8.74811	-0.24343	0.0111561	0.00015876	0.783934
152	M01358	finn-b-IPF	Idiopathic pulmonary fibrosis || id:finn-b-IPF	exposure	Weighted median	42	-0.498763	1.12771	0.658286	-2.70907	1.71154	0.607281	0.0665988	5.53749
153	M01358	finn-b-IPF	Idiopathic pulmonary fibrosis || id:finn-b-IPF	exposure	Inverse variance weighted	42	-0.538693	0.786533	0.49341	-2.0803	1.00291	0.583511	0.124893	2.72621
154	M01358	finn-b-IPF	Idiopathic pulmonary fibrosis || id:finn-b-IPF	exposure	Simple mode	42	1.26612	2.2689	0.579856	-3.18092	5.71317	3.54707	0.0415474	302.829
155	M01358	finn-b-IPF	Idiopathic pulmonary fibrosis || id:finn-b-IPF	exposure	Weighted mode	42	0.397327	2.16057	0.854999	-3.83738	4.63204	1.48784	0.02155	102.723
156	M01359	finn-b-IPF	Idiopathic pulmonary fibrosis || id:finn-b-IPF	exposure	MR Egger	20	-1.28645	4.01285	0.752219	-9.15164	6.57874	0.27625	0.000106046	719.632
157	M01359	finn-b-IPF	Idiopathic pulmonary fibrosis || id:finn-b-IPF	exposure	Weighted median	20	-1.29351	1.40912	0.358641	-4.05538	1.46836	0.274306	0.0173288	4.34211
158	M01359	finn-b-IPF	Idiopathic pulmonary fibrosis || id:finn-b-IPF	exposure	Inverse variance weighted	20	0.0303146	1.05794	0.97714	-2.04326	2.10388	1.03078	0.129606	8.19795
159	M01359	finn-b-IPF	Idiopathic pulmonary fibrosis || id:finn-b-IPF	exposure	Simple mode	20	-2.67296	2.44031	0.287061	-7.45596	2.11005	0.0690478	0.000577985	8.24865
160	M01359	finn-b-IPF	Idiopathic pulmonary fibrosis || id:finn-b-IPF	exposure	Weighted mode	20	-1.97192	2.27791	0.397471	-6.43663	2.49279	0.139189	0.00160179	12.095
161	M01361	finn-b-IPF	Idiopathic pulmonary fibrosis || id:finn-b-IPF	exposure	MR Egger	19	0.417952	2.23298	0.853741	-3.95869	4.79459	1.51885	0.0190881	120.855
162	M01361	finn-b-IPF	Idiopathic pulmonary fibrosis || id:finn-b-IPF	exposure	Weighted median	19	0.383831	1.13822	0.73595	-1.84707	2.61474	1.4679	0.157698	13.6636
163	M01361	finn-b-IPF	Idiopathic pulmonary fibrosis || id:finn-b-IPF	exposure	Inverse variance weighted	19	-0.687652	0.819711	0.401528	-2.29429	0.918981	0.502755	0.100833	2.50673
164	M01361	finn-b-IPF	Idiopathic pulmonary fibrosis || id:finn-b-IPF	exposure	Simple mode	19	0.988337	2.0269	0.631712	-2.98439	4.96107	2.68676	0.0505702	142.746
165	M01361	finn-b-IPF	Idiopathic pulmonary fibrosis || id:finn-b-IPF	exposure	Weighted mode	19	0.947526	1.68763	0.581412	-2.36023	4.25528	2.57932	0.0943989	70.4764
166	M01365	finn-b-IPF	Idiopathic pulmonary fibrosis || id:finn-b-IPF	exposure	MR Egger	22	0.65737	1.24618	0.603645	-1.78515	3.09989	1.92971	0.167772	22.1955
167	M01365	finn-b-IPF	Idiopathic pulmonary fibrosis || id:finn-b-IPF	exposure	Weighted median	22	-0.410995	1.03283	0.69068	-2.43534	1.61335	0.66299	0.087568	5.01959
168	M01365	finn-b-IPF	Idiopathic pulmonary fibrosis || id:finn-b-IPF	exposure	Inverse variance weighted	22	-0.173472	0.680463	0.798775	-1.50718	1.16024	0.840741	0.221534	3.19068
169	M01365	finn-b-IPF	Idiopathic pulmonary fibrosis || id:finn-b-IPF	exposure	Simple mode	22	-2.25255	1.79519	0.223347	-5.77112	1.26602	0.105131	0.00311627	3.5467
170	M01365	finn-b-IPF	Idiopathic pulmonary fibrosis || id:finn-b-IPF	exposure	Weighted mode	22	2.14986	1.58647	0.189777	-0.959619	5.25935	8.58368	0.383039	192.355
171	M01444	finn-b-IPF	Idiopathic pulmonary fibrosis || id:finn-b-IPF	exposure	MR Egger	15	1.87916	1.762	0.305607	-1.57436	5.33268	6.54799	0.20714	206.991
172	M01444	finn-b-IPF	Idiopathic pulmonary fibrosis || id:finn-b-IPF	exposure	Weighted median	15	0.81985	0.843401	0.331012	-0.833215	2.47292	2.27016	0.43465	11.857
173	M01444	finn-b-IPF	Idiopathic pulmonary fibrosis || id:finn-b-IPF	exposure	Inverse variance weighted	15	0.744223	0.614614	0.225941	-0.460419	1.94887	2.10481	0.631019	7.02072
174	M01444	finn-b-IPF	Idiopathic pulmonary fibrosis || id:finn-b-IPF	exposure	Simple mode	15	0.534752	1.25669	0.676924	-1.92837	2.99787	1.70702	0.145385	20.0429
175	M01444	finn-b-IPF	Idiopathic pulmonary fibrosis || id:finn-b-IPF	exposure	Weighted mode	15	0.862244	1.08653	0.440685	-1.26735	2.99184	2.36847	0.281577	19.9222
176	M01493	finn-b-IPF	Idiopathic pulmonary fibrosis || id:finn-b-IPF	exposure	MR Egger	9	-4.24664	3.55206	0.270801	-11.2087	2.71541	0.0143123	1.36e-05	15.1108
177	M01493	finn-b-IPF	Idiopathic pulmonary fibrosis || id:finn-b-IPF	exposure	Weighted median	9	-2.94898	1.73738	0.0896274	-6.35425	0.456295	0.0523933	0.00173934	1.57822
178	M01493	finn-b-IPF	Idiopathic pulmonary fibrosis || id:finn-b-IPF	exposure	Inverse variance weighted	9	-1.24775	1.2316	0.311009	-3.66169	1.1662	0.287151	0.0256891	3.20976
179	M01493	finn-b-IPF	Idiopathic pulmonary fibrosis || id:finn-b-IPF	exposure	Simple mode	9	-3.32768	2.92755	0.288574	-9.06568	2.41033	0.0358764	0.000115564	11.1376
180	M01493	finn-b-IPF	Idiopathic pulmonary fibrosis || id:finn-b-IPF	exposure	Weighted mode	9	-3.44961	2.18931	0.153753	-7.74065	0.841433	0.0317581	0.00043479	2.31969
181	M01494	finn-b-IPF	Idiopathic pulmonary fibrosis || id:finn-b-IPF	exposure	MR Egger	22	1.15299	1.49256	0.448857	-1.77243	4.0784	3.16764	0.16992	59.051
182	M01494	finn-b-IPF	Idiopathic pulmonary fibrosis || id:finn-b-IPF	exposure	Weighted median	22	0.713287	1.21938	0.558575	-1.6767	3.10327	2.04069	0.186991	22.2707
183	M01494	finn-b-IPF	Idiopathic pulmonary fibrosis || id:finn-b-IPF	exposure	Inverse variance weighted	22	0.431844	0.906518	0.633806	-1.34493	2.20862	1.5401	0.260558	9.10313
184	M01494	finn-b-IPF	Idiopathic pulmonary fibrosis || id:finn-b-IPF	exposure	Simple mode	22	0.700956	2.40832	0.773864	-4.01936	5.42127	2.01568	0.0179645	226.167
185	M01494	finn-b-IPF	Idiopathic pulmonary fibrosis || id:finn-b-IPF	exposure	Weighted mode	22	0.774151	1.28486	0.55328	-1.74417	3.29247	2.16875	0.17479	26.9093
186	M01508	finn-b-IPF	Idiopathic pulmonary fibrosis || id:finn-b-IPF	exposure	MR Egger	25	-0.681623	1.0575	0.525588	-2.75432	1.39107	0.505795	0.0636522	4.01917
187	M01508	finn-b-IPF	Idiopathic pulmonary fibrosis || id:finn-b-IPF	exposure	Weighted median	25	0.255859	0.885293	0.772573	-1.47932	1.99103	1.29157	0.227794	7.3231
188	M01508	finn-b-IPF	Idiopathic pulmonary fibrosis || id:finn-b-IPF	exposure	Inverse variance weighted	25	0.847962	0.60874	0.163626	-0.345168	2.04109	2.33488	0.708102	7.69901
189	M01508	finn-b-IPF	Idiopathic pulmonary fibrosis || id:finn-b-IPF	exposure	Simple mode	25	0.481198	1.33782	0.722227	-2.14094	3.10333	1.61801	0.117544	22.2721
190	M01508	finn-b-IPF	Idiopathic pulmonary fibrosis || id:finn-b-IPF	exposure	Weighted mode	25	0.180014	0.986624	0.856759	-1.75377	2.1138	1.19723	0.17312	8.27961
191	M01515	finn-b-IPF	Idiopathic pulmonary fibrosis || id:finn-b-IPF	exposure	MR Egger	18	0.109823	0.0868835	0.224326	-0.0604685	0.280115	1.11608	0.941323	1.32328
192	M01515	finn-b-IPF	Idiopathic pulmonary fibrosis || id:finn-b-IPF	exposure	Weighted median	18	0.0815196	0.0804089	0.310672	-0.0760818	0.239121	1.08493	0.92674	1.27013
193	M01515	finn-b-IPF	Idiopathic pulmonary fibrosis || id:finn-b-IPF	exposure	Inverse variance weighted	18	0.0193972	0.0624826	0.756225	-0.103069	0.141863	1.01959	0.902065	1.15242
194	M01515	finn-b-IPF	Idiopathic pulmonary fibrosis || id:finn-b-IPF	exposure	Simple mode	18	0.0135339	0.102552	0.896556	-0.187468	0.214536	1.01363	0.829055	1.23929
195	M01515	finn-b-IPF	Idiopathic pulmonary fibrosis || id:finn-b-IPF	exposure	Weighted mode	18	0.0653354	0.0760416	0.40218	-0.083706	0.214377	1.06752	0.919702	1.23909
196	M01558	finn-b-IPF	Idiopathic pulmonary fibrosis || id:finn-b-IPF	exposure	MR Egger	33	3.22099	2.37872	0.185499	-1.44131	7.88329	25.0529	0.236618	2652.58
197	M01558	finn-b-IPF	Idiopathic pulmonary fibrosis || id:finn-b-IPF	exposure	Weighted median	33	1.21876	1.45941	0.403658	-1.64168	4.0792	3.38298	0.193655	59.0979
198	M01558	finn-b-IPF	Idiopathic pulmonary fibrosis || id:finn-b-IPF	exposure	Inverse variance weighted	33	0.302647	0.995346	0.76108	-1.64823	2.25353	1.35344	0.19239	9.52124
199	M01558	finn-b-IPF	Idiopathic pulmonary fibrosis || id:finn-b-IPF	exposure	Simple mode	33	-3.297	2.77709	0.243882	-8.74011	2.1461	0.0369938	0.000160036	8.55145
200	M01558	finn-b-IPF	Idiopathic pulmonary fibrosis || id:finn-b-IPF	exposure	Weighted mode	33	1.84553	1.63692	0.26794	-1.36284	5.05389	6.33143	0.255934	156.63
201	M01561	finn-b-IPF	Idiopathic pulmonary fibrosis || id:finn-b-IPF	exposure	MR Egger	11	4.24736	2.02902	0.0658288	0.270491	8.22423	69.9207	1.31061	3730.26
202	M01561	finn-b-IPF	Idiopathic pulmonary fibrosis || id:finn-b-IPF	exposure	Weighted median	11	1.0248	1.02185	0.315915	-0.978023	3.02762	2.78654	0.376054	20.6481
203	M01561	finn-b-IPF	Idiopathic pulmonary fibrosis || id:finn-b-IPF	exposure	Inverse variance weighted	11	-0.0428731	0.864355	0.96044	-1.73701	1.65126	0.958033	0.176046	5.21355
204	M01561	finn-b-IPF	Idiopathic pulmonary fibrosis || id:finn-b-IPF	exposure	Simple mode	11	1.02997	1.55022	0.521457	-2.00845	4.06839	2.80098	0.134196	58.4629
205	M01561	finn-b-IPF	Idiopathic pulmonary fibrosis || id:finn-b-IPF	exposure	Weighted mode	11	1.20856	1.27855	0.366806	-1.2974	3.71453	3.34867	0.273241	41.0392
206	M01564	finn-b-IPF	Idiopathic pulmonary fibrosis || id:finn-b-IPF	exposure	MR Egger	42	1.12002	2.54095	0.66174	-3.86024	6.10028	3.06492	0.0210629	445.985
207	M01564	finn-b-IPF	Idiopathic pulmonary fibrosis || id:finn-b-IPF	exposure	Weighted median	42	-1.43111	1.23355	0.245986	-3.84886	0.986646	0.239044	0.0213041	2.68222
208	M01564	finn-b-IPF	Idiopathic pulmonary fibrosis || id:finn-b-IPF	exposure	Inverse variance weighted	42	-0.768979	0.916986	0.401697	-2.56627	1.02831	0.463486	0.0768215	2.79634
209	M01564	finn-b-IPF	Idiopathic pulmonary fibrosis || id:finn-b-IPF	exposure	Simple mode	42	-2.27603	2.26224	0.32027	-6.71001	2.15795	0.102691	0.00121865	8.65341
210	M01564	finn-b-IPF	Idiopathic pulmonary fibrosis || id:finn-b-IPF	exposure	Weighted mode	42	-2.10199	1.80863	0.251876	-5.6469	1.44293	0.122213	0.00352843	4.23308
211	M01572	finn-b-IPF	Idiopathic pulmonary fibrosis || id:finn-b-IPF	exposure	MR Egger	16	1.35633	3.63618	0.714728	-5.77058	8.48324	3.88193	0.00311794	4833.1
212	M01572	finn-b-IPF	Idiopathic pulmonary fibrosis || id:finn-b-IPF	exposure	Weighted median	16	0.346846	1.37824	0.801304	-2.3545	3.04819	1.4146	0.0949414	21.0771
213	M01572	finn-b-IPF	Idiopathic pulmonary fibrosis || id:finn-b-IPF	exposure	Inverse variance weighted	16	-0.513909	1.09886	0.640017	-2.66768	1.63986	0.598153	0.0694134	5.15443
214	M01572	finn-b-IPF	Idiopathic pulmonary fibrosis || id:finn-b-IPF	exposure	Simple mode	16	0.288964	2.48397	0.908933	-4.57961	5.15754	1.33504	0.0102589	173.736
215	M01572	finn-b-IPF	Idiopathic pulmonary fibrosis || id:finn-b-IPF	exposure	Weighted mode	16	0.495429	2.22068	0.826469	-3.85711	4.84796	1.6412	0.0211291	127.481
216	M01573	finn-b-IPF	Idiopathic pulmonary fibrosis || id:finn-b-IPF	exposure	MR Egger	13	0.87883	0.921024	0.360487	-0.926378	2.68404	2.40808	0.395985	14.6441
217	M01573	finn-b-IPF	Idiopathic pulmonary fibrosis || id:finn-b-IPF	exposure	Weighted median	13	0.0152809	0.4616	0.973592	-0.889456	0.920018	1.0154	0.410879	2.50933
218	M01573	finn-b-IPF	Idiopathic pulmonary fibrosis || id:finn-b-IPF	exposure	Inverse variance weighted	13	-0.27117	0.329322	0.410269	-0.916641	0.3743	0.762487	0.39986	1.45397
219	M01573	finn-b-IPF	Idiopathic pulmonary fibrosis || id:finn-b-IPF	exposure	Simple mode	13	0.0812297	0.69168	0.908455	-1.27446	1.43692	1.08462	0.279581	4.20773
220	M01573	finn-b-IPF	Idiopathic pulmonary fibrosis || id:finn-b-IPF	exposure	Weighted mode	13	0.0437931	0.568906	0.93991	-1.07126	1.15885	1.04477	0.342576	3.18626
221	M01585	finn-b-IPF	Idiopathic pulmonary fibrosis || id:finn-b-IPF	exposure	MR Egger	23	4.74328	28.9641	0.871483	-52.0264	61.513	114.81	2.54e-23	5.18e+26
222	M01585	finn-b-IPF	Idiopathic pulmonary fibrosis || id:finn-b-IPF	exposure	Weighted median	23	3.35905	2.27705	0.140165	-1.10396	7.82206	28.7618	0.331555	2495.04
223	M01585	finn-b-IPF	Idiopathic pulmonary fibrosis || id:finn-b-IPF	exposure	Inverse variance weighted	23	2.56796	1.60944	0.110586	-0.586539	5.72245	13.0392	0.556249	305.654
224	M01585	finn-b-IPF	Idiopathic pulmonary fibrosis || id:finn-b-IPF	exposure	Simple mode	23	4.62747	4.45094	0.309789	-4.09637	13.3513	102.255	0.016633	628638
225	M01585	finn-b-IPF	Idiopathic pulmonary fibrosis || id:finn-b-IPF	exposure	Weighted mode	23	4.25634	4.42191	0.346232	-4.41061	12.9233	70.5511	0.0121477	409744
226	M01604	finn-b-IPF	Idiopathic pulmonary fibrosis || id:finn-b-IPF	exposure	MR Egger	18	-1.00418	2.90075	0.733718	-6.68964	4.68128	0.366345	0.00124373	107.908
227	M01604	finn-b-IPF	Idiopathic pulmonary fibrosis || id:finn-b-IPF	exposure	Weighted median	18	-0.214512	1.65082	0.896612	-3.45013	3.0211	0.806935	0.0317416	20.5139
228	M01604	finn-b-IPF	Idiopathic pulmonary fibrosis || id:finn-b-IPF	exposure	Inverse variance weighted	18	-0.390349	1.44662	0.787287	-3.22573	2.44503	0.67682	0.0397268	11.5309
229	M01604	finn-b-IPF	Idiopathic pulmonary fibrosis || id:finn-b-IPF	exposure	Simple mode	18	-2.06646	2.94566	0.492466	-7.83995	3.70702	0.126633	0.00039369	40.7324
230	M01604	finn-b-IPF	Idiopathic pulmonary fibrosis || id:finn-b-IPF	exposure	Weighted mode	18	-0.155858	1.48297	0.917527	-3.06247	2.75076	0.85568	0.0467719	15.6545
231	M01605	finn-b-IPF	Idiopathic pulmonary fibrosis || id:finn-b-IPF	exposure	MR Egger	11	-0.310317	0.464899	0.521203	-1.22152	0.600885	0.733214	0.294782	1.82373
232	M01605	finn-b-IPF	Idiopathic pulmonary fibrosis || id:finn-b-IPF	exposure	Weighted median	11	-0.308212	0.366003	0.39973	-1.02558	0.409154	0.734759	0.358589	1.50554
233	M01605	finn-b-IPF	Idiopathic pulmonary fibrosis || id:finn-b-IPF	exposure	Inverse variance weighted	11	-0.138715	0.270037	0.607468	-0.667987	0.390556	0.870476	0.51274	1.4778
234	M01605	finn-b-IPF	Idiopathic pulmonary fibrosis || id:finn-b-IPF	exposure	Simple mode	11	-0.478938	0.484106	0.345838	-1.42779	0.469911	0.619441	0.239839	1.59985
235	M01605	finn-b-IPF	Idiopathic pulmonary fibrosis || id:finn-b-IPF	exposure	Weighted mode	11	-0.33728	0.362246	0.373745	-1.04728	0.372723	0.713709	0.35089	1.45168
236	M01638	finn-b-IPF	Idiopathic pulmonary fibrosis || id:finn-b-IPF	exposure	MR Egger	19	-3.83662	2.9774	0.214805	-9.67233	1.99908	0.0215663	6.3e-05	7.38229
237	M01638	finn-b-IPF	Idiopathic pulmonary fibrosis || id:finn-b-IPF	exposure	Weighted median	19	-0.416509	1.24417	0.737798	-2.85507	2.02205	0.659344	0.0575516	7.55383
238	M01638	finn-b-IPF	Idiopathic pulmonary fibrosis || id:finn-b-IPF	exposure	Inverse variance weighted	19	-0.35437	0.905494	0.695534	-2.12914	1.4204	0.701615	0.11894	4.13876
239	M01638	finn-b-IPF	Idiopathic pulmonary fibrosis || id:finn-b-IPF	exposure	Simple mode	19	0.239179	2.4283	0.922627	-4.52029	4.99865	1.27021	0.0108859	148.212
240	M01638	finn-b-IPF	Idiopathic pulmonary fibrosis || id:finn-b-IPF	exposure	Weighted mode	19	-0.0709543	2.40777	0.976815	-4.79019	4.64828	0.931504	0.00831087	104.406
241	M01640	finn-b-IPF	Idiopathic pulmonary fibrosis || id:finn-b-IPF	exposure	MR Egger	14	-0.0391958	0.262838	0.883932	-0.554359	0.475967	0.961562	0.57444	1.60957
242	M01640	finn-b-IPF	Idiopathic pulmonary fibrosis || id:finn-b-IPF	exposure	Weighted median	14	-0.0865294	0.210843	0.681515	-0.499782	0.326723	0.917109	0.606663	1.38642
243	M01640	finn-b-IPF	Idiopathic pulmonary fibrosis || id:finn-b-IPF	exposure	Inverse variance weighted	14	-0.115995	0.152264	0.446181	-0.414433	0.182444	0.89048	0.660715	1.20015
244	M01640	finn-b-IPF	Idiopathic pulmonary fibrosis || id:finn-b-IPF	exposure	Simple mode	14	-0.317109	0.345131	0.37493	-0.993565	0.359348	0.728252	0.370254	1.4324
245	M01640	finn-b-IPF	Idiopathic pulmonary fibrosis || id:finn-b-IPF	exposure	Weighted mode	14	-0.0940881	0.19255	0.633234	-0.471486	0.28331	0.910203	0.624074	1.32752
246	M01644	finn-b-IPF	Idiopathic pulmonary fibrosis || id:finn-b-IPF	exposure	MR Egger	33	3.95528	2.26842	0.0911351	-0.490824	8.40139	52.2104	0.612122	4453.24
247	M01644	finn-b-IPF	Idiopathic pulmonary fibrosis || id:finn-b-IPF	exposure	Weighted median	33	2.02709	1.13684	0.0745723	-0.201124	4.25531	7.59197	0.817811	70.4784
248	M01644	finn-b-IPF	Idiopathic pulmonary fibrosis || id:finn-b-IPF	exposure	Inverse variance weighted	33	0.805332	0.797902	0.312825	-0.758556	2.36922	2.23744	0.468342	10.6891
249	M01644	finn-b-IPF	Idiopathic pulmonary fibrosis || id:finn-b-IPF	exposure	Simple mode	33	2.76435	1.92601	0.160911	-1.01062	6.53933	15.8688	0.363992	691.822
250	M01644	finn-b-IPF	Idiopathic pulmonary fibrosis || id:finn-b-IPF	exposure	Weighted mode	33	2.6652	1.45122	0.0755857	-0.179196	5.5096	14.3709	0.835942	247.053
251	M01645	finn-b-IPF	Idiopathic pulmonary fibrosis || id:finn-b-IPF	exposure	MR Egger	38	-0.421128	1.54287	0.78645	-3.44515	2.60289	0.656306	0.0319001	13.5027
252	M01645	finn-b-IPF	Idiopathic pulmonary fibrosis || id:finn-b-IPF	exposure	Weighted median	38	1.29355	1.14463	0.258432	-0.949923	3.53703	3.64572	0.386771	34.3647
253	M01645	finn-b-IPF	Idiopathic pulmonary fibrosis || id:finn-b-IPF	exposure	Inverse variance weighted	38	0.692226	0.756709	0.360304	-0.790923	2.17538	1.99816	0.453426	8.80549
254	M01645	finn-b-IPF	Idiopathic pulmonary fibrosis || id:finn-b-IPF	exposure	Simple mode	38	0.860943	2.09742	0.683824	-3.25001	4.97189	2.36539	0.038774	144.3
255	M01645	finn-b-IPF	Idiopathic pulmonary fibrosis || id:finn-b-IPF	exposure	Weighted mode	38	1.08372	1.29774	0.409031	-1.45985	3.6273	2.95566	0.232271	37.611
256	M01649	finn-b-IPF	Idiopathic pulmonary fibrosis || id:finn-b-IPF	exposure	MR Egger	6	-1.74931	2.63663	0.543317	-6.9171	3.41848	0.173894	0.000990702	30.5229
257	M01649	finn-b-IPF	Idiopathic pulmonary fibrosis || id:finn-b-IPF	exposure	Weighted median	6	-1.19547	2.49531	0.631876	-6.08628	3.69533	0.302561	0.00227386	40.259
258	M01649	finn-b-IPF	Idiopathic pulmonary fibrosis || id:finn-b-IPF	exposure	Inverse variance weighted	6	0.341803	1.94675	0.860627	-3.47383	4.15744	1.40748	0.0309979	63.9077
259	M01649	finn-b-IPF	Idiopathic pulmonary fibrosis || id:finn-b-IPF	exposure	Simple mode	6	-1.07619	4.81507	0.831987	-10.5137	8.36135	0.340891	2.72e-05	4278.45
260	M01649	finn-b-IPF	Idiopathic pulmonary fibrosis || id:finn-b-IPF	exposure	Weighted mode	6	-1.33245	2.30881	0.588872	-5.85772	3.19282	0.263831	0.00285776	24.3571
261	M01670	finn-b-IPF	Idiopathic pulmonary fibrosis || id:finn-b-IPF	exposure	MR Egger	12	3.15751	3.80809	0.426363	-4.30634	10.6214	23.512	0.0134828	41001.5
262	M01670	finn-b-IPF	Idiopathic pulmonary fibrosis || id:finn-b-IPF	exposure	Weighted median	12	0.426097	1.64514	0.795633	-2.79838	3.65057	1.53127	0.0609087	38.4967
263	M01670	finn-b-IPF	Idiopathic pulmonary fibrosis || id:finn-b-IPF	exposure	Inverse variance weighted	12	0.809352	1.14702	0.480427	-1.4388	3.0575	2.24645	0.237213	21.2744
264	M01670	finn-b-IPF	Idiopathic pulmonary fibrosis || id:finn-b-IPF	exposure	Simple mode	12	2.8046	3.02723	0.374089	-3.12877	8.73797	16.5204	0.0437714	6235.23
265	M01670	finn-b-IPF	Idiopathic pulmonary fibrosis || id:finn-b-IPF	exposure	Weighted mode	12	1.13413	2.30954	0.633032	-3.39257	5.66083	3.10847	0.0336221	287.388
266	M01712	finn-b-IPF	Idiopathic pulmonary fibrosis || id:finn-b-IPF	exposure	MR Egger	13	0.576888	1.72825	0.744808	-2.81048	3.96425	1.78049	0.0601763	52.6808
267	M01712	finn-b-IPF	Idiopathic pulmonary fibrosis || id:finn-b-IPF	exposure	Weighted median	13	1.05751	0.938197	0.25967	-0.781357	2.89637	2.87919	0.457784	18.1084
268	M01712	finn-b-IPF	Idiopathic pulmonary fibrosis || id:finn-b-IPF	exposure	Inverse variance weighted	13	1.12038	0.742011	0.131062	-0.333959	2.57472	3.06603	0.716083	13.1277
269	M01712	finn-b-IPF	Idiopathic pulmonary fibrosis || id:finn-b-IPF	exposure	Simple mode	13	1.11803	1.48021	0.464624	-1.78317	4.01923	3.05882	0.168104	55.6584
270	M01712	finn-b-IPF	Idiopathic pulmonary fibrosis || id:finn-b-IPF	exposure	Weighted mode	13	1.25935	1.31232	0.356175	-1.31279	3.83149	3.52312	0.269067	46.1312
271	M01769	finn-b-IPF	Idiopathic pulmonary fibrosis || id:finn-b-IPF	exposure	MR Egger	34	-0.727588	1.66381	0.664829	-3.98865	2.53347	0.483073	0.0185248	12.5972
272	M01769	finn-b-IPF	Idiopathic pulmonary fibrosis || id:finn-b-IPF	exposure	Weighted median	34	-0.386504	1.12786	0.731834	-2.59712	1.82411	0.679428	0.0744881	6.19727
273	M01769	finn-b-IPF	Idiopathic pulmonary fibrosis || id:finn-b-IPF	exposure	Inverse variance weighted	34	-0.117776	0.78589	0.880872	-1.65812	1.42257	0.888895	0.190497	4.14776
274	M01769	finn-b-IPF	Idiopathic pulmonary fibrosis || id:finn-b-IPF	exposure	Simple mode	34	0.363241	2.07603	0.862173	-3.70578	4.43226	1.43798	0.024581	84.1215
275	M01769	finn-b-IPF	Idiopathic pulmonary fibrosis || id:finn-b-IPF	exposure	Weighted mode	34	-0.458426	1.56363	0.77122	-3.52313	2.60628	0.632278	0.0295068	13.5486
276	M01898	finn-b-IPF	Idiopathic pulmonary fibrosis || id:finn-b-IPF	exposure	MR Egger	31	-1.32037	1.45825	0.372691	-4.17855	1.53781	0.267036	0.0153207	4.65438
277	M01898	finn-b-IPF	Idiopathic pulmonary fibrosis || id:finn-b-IPF	exposure	Weighted median	31	-1.20095	1.05203	0.253638	-3.26293	0.861028	0.300907	0.0382759	2.36559
278	M01898	finn-b-IPF	Idiopathic pulmonary fibrosis || id:finn-b-IPF	exposure	Inverse variance weighted	31	0.0487567	0.741175	0.947551	-1.40395	1.50146	1.04996	0.245626	4.48824
279	M01898	finn-b-IPF	Idiopathic pulmonary fibrosis || id:finn-b-IPF	exposure	Simple mode	31	-1.29957	2.01533	0.523931	-5.2496	2.65047	0.27265	0.0052496	14.1607
280	M01898	finn-b-IPF	Idiopathic pulmonary fibrosis || id:finn-b-IPF	exposure	Weighted mode	31	-1.1735	1.15496	0.317728	-3.43722	1.09022	0.309282	0.0321538	2.97493
281	M02132	finn-b-IPF	Idiopathic pulmonary fibrosis || id:finn-b-IPF	exposure	MR Egger	39	-2.09275	2.30206	0.369193	-6.60479	2.41929	0.123347	0.00135386	11.2378
282	M02132	finn-b-IPF	Idiopathic pulmonary fibrosis || id:finn-b-IPF	exposure	Weighted median	39	1.73144	1.30322	0.183984	-0.822864	4.28574	5.64877	0.439172	72.6562
283	M02132	finn-b-IPF	Idiopathic pulmonary fibrosis || id:finn-b-IPF	exposure	Inverse variance weighted	39	1.00376	0.89062	0.259727	-0.741855	2.74938	2.72852	0.47623	15.6329
284	M02132	finn-b-IPF	Idiopathic pulmonary fibrosis || id:finn-b-IPF	exposure	Simple mode	39	3.24929	2.65411	0.228396	-1.95278	8.45135	25.7719	0.141879	4681.39
285	M02132	finn-b-IPF	Idiopathic pulmonary fibrosis || id:finn-b-IPF	exposure	Weighted mode	39	2.26657	2.1469	0.297752	-1.94135	6.47449	9.64629	0.143511	648.39
286	M02137	finn-b-IPF	Idiopathic pulmonary fibrosis || id:finn-b-IPF	exposure	MR Egger	14	-0.40172	0.522223	0.45662	-1.42528	0.621838	0.669168	0.240442	1.86235
287	M02137	finn-b-IPF	Idiopathic pulmonary fibrosis || id:finn-b-IPF	exposure	Weighted median	14	-0.42552	0.406231	0.294876	-1.22173	0.370692	0.65343	0.294719	1.44874
288	M02137	finn-b-IPF	Idiopathic pulmonary fibrosis || id:finn-b-IPF	exposure	Inverse variance weighted	14	-0.323274	0.342747	0.345587	-0.995059	0.348511	0.723776	0.369702	1.41696
289	M02137	finn-b-IPF	Idiopathic pulmonary fibrosis || id:finn-b-IPF	exposure	Simple mode	14	-0.112248	0.996452	0.91203	-2.06529	1.8408	0.893822	0.126781	6.30156
290	M02137	finn-b-IPF	Idiopathic pulmonary fibrosis || id:finn-b-IPF	exposure	Weighted mode	14	-0.409905	0.404105	0.328922	-1.20195	0.382141	0.663713	0.300607	1.46542
291	M02342	finn-b-IPF	Idiopathic pulmonary fibrosis || id:finn-b-IPF	exposure	MR Egger	15	0.77195	1.06206	0.480207	-1.30969	2.85359	2.16398	0.269904	17.3499
292	M02342	finn-b-IPF	Idiopathic pulmonary fibrosis || id:finn-b-IPF	exposure	Weighted median	15	0.511449	0.756502	0.498996	-0.971295	1.99419	1.66771	0.378592	7.34628
293	M02342	finn-b-IPF	Idiopathic pulmonary fibrosis || id:finn-b-IPF	exposure	Inverse variance weighted	15	0.355485	0.579852	0.539836	-0.781025	1.492	1.42687	0.457936	4.44596
294	M02342	finn-b-IPF	Idiopathic pulmonary fibrosis || id:finn-b-IPF	exposure	Simple mode	15	1.91477	1.23046	0.141987	-0.496937	4.32648	6.78539	0.608392	75.6774
295	M02342	finn-b-IPF	Idiopathic pulmonary fibrosis || id:finn-b-IPF	exposure	Weighted mode	15	0.90258	0.828189	0.294194	-0.720671	2.52583	2.46596	0.486426	12.5013
296	M02730	finn-b-IPF	Idiopathic pulmonary fibrosis || id:finn-b-IPF	exposure	MR Egger	20	1.70008	1.33253	0.218237	-0.911691	4.31184	5.47437	0.401844	74.5779
297	M02730	finn-b-IPF	Idiopathic pulmonary fibrosis || id:finn-b-IPF	exposure	Weighted median	20	0.904473	1.13845	0.426917	-1.32689	3.13583	2.47063	0.265302	23.0078
298	M02730	finn-b-IPF	Idiopathic pulmonary fibrosis || id:finn-b-IPF	exposure	Inverse variance weighted	20	0.43695	0.764119	0.567434	-1.06072	1.93462	1.54798	0.346205	6.92144
299	M02730	finn-b-IPF	Idiopathic pulmonary fibrosis || id:finn-b-IPF	exposure	Simple mode	20	1.91421	1.86179	0.316787	-1.73489	5.56332	6.78161	0.17642	260.686
300	M02730	finn-b-IPF	Idiopathic pulmonary fibrosis || id:finn-b-IPF	exposure	Weighted mode	20	1.04193	1.08577	0.349297	-1.08617	3.17003	2.83468	0.337506	23.8083
301	M02734	finn-b-IPF	Idiopathic pulmonary fibrosis || id:finn-b-IPF	exposure	MR Egger	43	-0.960988	2.72125	0.725792	-6.29464	4.37267	0.382515	0.00184617	79.2548
302	M02734	finn-b-IPF	Idiopathic pulmonary fibrosis || id:finn-b-IPF	exposure	Weighted median	43	1.08658	1.11979	0.331877	-1.10821	3.28136	2.96411	0.33015	26.612
303	M02734	finn-b-IPF	Idiopathic pulmonary fibrosis || id:finn-b-IPF	exposure	Inverse variance weighted	43	0.254201	0.842459	0.762853	-1.39702	1.90542	1.28943	0.247333	6.72224
304	M02734	finn-b-IPF	Idiopathic pulmonary fibrosis || id:finn-b-IPF	exposure	Simple mode	43	1.74578	2.79697	0.535892	-3.73627	7.22784	5.73039	0.0238428	1377.25
305	M02734	finn-b-IPF	Idiopathic pulmonary fibrosis || id:finn-b-IPF	exposure	Weighted mode	43	2.46583	2.43889	0.317784	-2.31439	7.24604	11.7732	0.0988264	1402.54
306	M03127	finn-b-IPF	Idiopathic pulmonary fibrosis || id:finn-b-IPF	exposure	MR Egger	21	-0.691704	1.9181	0.722362	-4.45118	3.06777	0.500722	0.0116648	21.4939
307	M03127	finn-b-IPF	Idiopathic pulmonary fibrosis || id:finn-b-IPF	exposure	Weighted median	21	-1.20186	0.982969	0.22145	-3.12848	0.724761	0.300635	0.0437845	2.06424
308	M03127	finn-b-IPF	Idiopathic pulmonary fibrosis || id:finn-b-IPF	exposure	Inverse variance weighted	21	-1.49124	0.706675	0.0348394	-2.87632	-0.106157	0.225093	0.0563415	0.899283
309	M03127	finn-b-IPF	Idiopathic pulmonary fibrosis || id:finn-b-IPF	exposure	Simple mode	21	-1.00888	2.028	0.624279	-4.98377	2.96601	0.364627	0.00684819	19.4142
310	M03127	finn-b-IPF	Idiopathic pulmonary fibrosis || id:finn-b-IPF	exposure	Weighted mode	21	-0.176446	1.69129	0.91795	-3.49138	3.13849	0.838244	0.0304588	23.069
311	M03141	finn-b-IPF	Idiopathic pulmonary fibrosis || id:finn-b-IPF	exposure	MR Egger	22	3.48057	1.66083	0.0490393	0.225341	6.73579	32.4781	1.25275	842.011
312	M03141	finn-b-IPF	Idiopathic pulmonary fibrosis || id:finn-b-IPF	exposure	Weighted median	22	0.594312	1.01592	0.558547	-1.39688	2.58551	1.81178	0.247366	13.2701
313	M03141	finn-b-IPF	Idiopathic pulmonary fibrosis || id:finn-b-IPF	exposure	Inverse variance weighted	22	0.121114	0.748133	0.871394	-1.34523	1.58745	1.12875	0.260481	4.89128
314	M03141	finn-b-IPF	Idiopathic pulmonary fibrosis || id:finn-b-IPF	exposure	Simple mode	22	-0.026294	1.62186	0.987218	-3.20514	3.15255	0.974049	0.0405532	23.3957
315	M03141	finn-b-IPF	Idiopathic pulmonary fibrosis || id:finn-b-IPF	exposure	Weighted mode	22	0.655658	1.21615	0.595472	-1.72801	3.03932	1.92641	0.177638	20.8911
316	M03147	finn-b-IPF	Idiopathic pulmonary fibrosis || id:finn-b-IPF	exposure	MR Egger	3	-0.733499	9.37861	0.950311	-19.1156	17.6486	0.480226	4.99e-09	4.62038e+07
317	M03147	finn-b-IPF	Idiopathic pulmonary fibrosis || id:finn-b-IPF	exposure	Weighted median	3	-1.11755	2.62928	0.670808	-6.27095	4.03585	0.32708	0.00189044	56.5909
318	M03147	finn-b-IPF	Idiopathic pulmonary fibrosis || id:finn-b-IPF	exposure	Inverse variance weighted	3	-0.250425	2.6097	0.923553	-5.36545	4.8646	0.77847	0.00467537	129.619
319	M03147	finn-b-IPF	Idiopathic pulmonary fibrosis || id:finn-b-IPF	exposure	Simple mode	3	-2.03147	3.02548	0.571098	-7.96142	3.89847	0.131142	0.000348659	49.3269
320	M03147	finn-b-IPF	Idiopathic pulmonary fibrosis || id:finn-b-IPF	exposure	Weighted mode	3	-1.52354	2.86403	0.647932	-7.13704	4.08995	0.217938	0.000795103	59.7371
321	M10642	finn-b-IPF	Idiopathic pulmonary fibrosis || id:finn-b-IPF	exposure	MR Egger	31	0.404654	1.24836	0.748152	-2.04213	2.85144	1.49878	0.129752	17.3127
322	M10642	finn-b-IPF	Idiopathic pulmonary fibrosis || id:finn-b-IPF	exposure	Weighted median	31	0.237516	1.14327	0.835423	-2.0033	2.47833	1.2681	0.13489	11.9213
323	M10642	finn-b-IPF	Idiopathic pulmonary fibrosis || id:finn-b-IPF	exposure	Inverse variance weighted	31	1.00013	0.726015	0.168337	-0.422855	2.42312	2.71865	0.655174	11.281
324	M10642	finn-b-IPF	Idiopathic pulmonary fibrosis || id:finn-b-IPF	exposure	Simple mode	31	0.486927	2.43587	0.842908	-4.28737	5.26123	1.62731	0.013741	192.718
325	M10642	finn-b-IPF	Idiopathic pulmonary fibrosis || id:finn-b-IPF	exposure	Weighted mode	31	0.171214	1.05003	0.871568	-1.88684	2.22927	1.18674	0.151549	9.29309
326	M11438	finn-b-IPF	Idiopathic pulmonary fibrosis || id:finn-b-IPF	exposure	MR Egger	4	1.80333	3.84958	0.685559	-5.74185	9.34851	6.06983	0.00320882	11481.7
327	M11438	finn-b-IPF	Idiopathic pulmonary fibrosis || id:finn-b-IPF	exposure	Weighted median	4	2.28594	2.4799	0.356638	-2.57465	7.14654	9.83496	0.0761802	1269.7
328	M11438	finn-b-IPF	Idiopathic pulmonary fibrosis || id:finn-b-IPF	exposure	Inverse variance weighted	4	2.9817	1.95511	0.127239	-0.850311	6.81371	19.7213	0.427282	910.239
329	M11438	finn-b-IPF	Idiopathic pulmonary fibrosis || id:finn-b-IPF	exposure	Simple mode	4	2.22796	3.22141	0.5389	-4.08601	8.54193	9.28091	0.0168062	5125.21
330	M11438	finn-b-IPF	Idiopathic pulmonary fibrosis || id:finn-b-IPF	exposure	Weighted mode	4	1.98526	2.79375	0.52859	-3.49049	7.46102	7.28095	0.0304858	1738.92
331	M12017	finn-b-IPF	Idiopathic pulmonary fibrosis || id:finn-b-IPF	exposure	MR Egger	15	2.90149	2.40837	0.249774	-1.81892	7.6219	18.2013	0.162201	2042.45
332	M12017	finn-b-IPF	Idiopathic pulmonary fibrosis || id:finn-b-IPF	exposure	Weighted median	15	0.911051	1.05849	0.389399	-1.16359	2.98569	2.48694	0.312363	19.8002
333	M12017	finn-b-IPF	Idiopathic pulmonary fibrosis || id:finn-b-IPF	exposure	Inverse variance weighted	15	0.100923	0.797951	0.899354	-1.46306	1.66491	1.10619	0.231526	5.28518
334	M12017	finn-b-IPF	Idiopathic pulmonary fibrosis || id:finn-b-IPF	exposure	Simple mode	15	-0.276231	1.55955	0.861949	-3.33295	2.78049	0.758638	0.0356877	16.1269
335	M12017	finn-b-IPF	Idiopathic pulmonary fibrosis || id:finn-b-IPF	exposure	Weighted mode	15	0.915454	1.25416	0.477466	-1.54269	3.3736	2.49791	0.213805	29.1834
336	M12035	finn-b-IPF	Idiopathic pulmonary fibrosis || id:finn-b-IPF	exposure	MR Egger	33	0.312327	3.31144	0.925464	-6.1781	6.80276	1.3666	0.00207436	900.327
337	M12035	finn-b-IPF	Idiopathic pulmonary fibrosis || id:finn-b-IPF	exposure	Weighted median	33	1.29747	1.27117	0.307401	-1.19402	3.78896	3.66002	0.303	44.2104
338	M12035	finn-b-IPF	Idiopathic pulmonary fibrosis || id:finn-b-IPF	exposure	Inverse variance weighted	33	0.876812	0.881878	0.320099	-0.85167	2.60529	2.40322	0.426702	13.5352
339	M12035	finn-b-IPF	Idiopathic pulmonary fibrosis || id:finn-b-IPF	exposure	Simple mode	33	2.7531	2.44464	0.268465	-2.03839	7.5446	15.6912	0.130238	1890.5
340	M12035	finn-b-IPF	Idiopathic pulmonary fibrosis || id:finn-b-IPF	exposure	Weighted mode	33	2.53693	2.13748	0.244012	-1.65253	6.72639	12.6408	0.191565	834.13
341	M12067	finn-b-IPF	Idiopathic pulmonary fibrosis || id:finn-b-IPF	exposure	MR Egger	27	0.545611	2.48848	0.828232	-4.33181	5.42303	1.72566	0.0131437	226.565
342	M12067	finn-b-IPF	Idiopathic pulmonary fibrosis || id:finn-b-IPF	exposure	Weighted median	27	-0.542116	1.50915	0.719431	-3.50005	2.41582	0.581516	0.0301957	11.199
343	M12067	finn-b-IPF	Idiopathic pulmonary fibrosis || id:finn-b-IPF	exposure	Inverse variance weighted	27	-0.26649	1.10784	0.809904	-2.43786	1.90488	0.766063	0.0873477	6.71858
344	M12067	finn-b-IPF	Idiopathic pulmonary fibrosis || id:finn-b-IPF	exposure	Simple mode	27	-1.64521	2.93985	0.580525	-7.40731	4.11689	0.192972	0.0006068	61.368
345	M12067	finn-b-IPF	Idiopathic pulmonary fibrosis || id:finn-b-IPF	exposure	Weighted mode	27	-1.92952	2.9424	0.517737	-7.69663	3.83758	0.145217	0.000454358	46.413
346	M12129	finn-b-IPF	Idiopathic pulmonary fibrosis || id:finn-b-IPF	exposure	MR Egger	23	-1.04133	1.6598	0.537172	-4.29453	2.21188	0.352986	0.0136429	9.13288
347	M12129	finn-b-IPF	Idiopathic pulmonary fibrosis || id:finn-b-IPF	exposure	Weighted median	23	-0.43642	0.932734	0.639861	-2.26458	1.39174	0.646346	0.103874	4.02184
348	M12129	finn-b-IPF	Idiopathic pulmonary fibrosis || id:finn-b-IPF	exposure	Inverse variance weighted	23	-0.2116	0.658514	0.747961	-1.50229	1.07909	0.809289	0.22262	2.94199
349	M12129	finn-b-IPF	Idiopathic pulmonary fibrosis || id:finn-b-IPF	exposure	Simple mode	23	-0.43721	1.45666	0.766884	-3.29226	2.41784	0.645836	0.0371697	11.2216
350	M12129	finn-b-IPF	Idiopathic pulmonary fibrosis || id:finn-b-IPF	exposure	Weighted mode	23	-0.48061	1.13895	0.677138	-2.71296	1.75174	0.618406	0.0663403	5.76461
351	M12261	finn-b-IPF	Idiopathic pulmonary fibrosis || id:finn-b-IPF	exposure	MR Egger	13	-0.24572	0.931129	0.796739	-2.07073	1.57929	0.782141	0.126093	4.85152
352	M12261	finn-b-IPF	Idiopathic pulmonary fibrosis || id:finn-b-IPF	exposure	Weighted median	13	-0.37579	0.358263	0.294213	-1.07798	0.326404	0.686746	0.340281	1.38598
353	M12261	finn-b-IPF	Idiopathic pulmonary fibrosis || id:finn-b-IPF	exposure	Inverse variance weighted	13	-0.203679	0.263228	0.439064	-0.719606	0.312248	0.815724	0.486944	1.36649
354	M12261	finn-b-IPF	Idiopathic pulmonary fibrosis || id:finn-b-IPF	exposure	Simple mode	13	-0.476224	0.564438	0.415332	-1.58252	0.630075	0.621124	0.205456	1.87775
355	M12261	finn-b-IPF	Idiopathic pulmonary fibrosis || id:finn-b-IPF	exposure	Weighted mode	13	-0.463247	0.52255	0.392762	-1.48745	0.560952	0.629237	0.225949	1.75234
356	M12593	finn-b-IPF	Idiopathic pulmonary fibrosis || id:finn-b-IPF	exposure	MR Egger	24	-3.5689	3.59458	0.331576	-10.6143	3.47648	0.0281869	2.46e-05	32.3455
357	M12593	finn-b-IPF	Idiopathic pulmonary fibrosis || id:finn-b-IPF	exposure	Weighted median	24	-0.274239	1.86511	0.883104	-3.92986	3.38139	0.76015	0.0196464	29.4115
358	M12593	finn-b-IPF	Idiopathic pulmonary fibrosis || id:finn-b-IPF	exposure	Inverse variance weighted	24	-1.4631	1.26564	0.247676	-3.94376	1.01756	0.231517	0.0193752	2.76644
359	M12593	finn-b-IPF	Idiopathic pulmonary fibrosis || id:finn-b-IPF	exposure	Simple mode	24	0.0599078	3.55494	0.9867	-6.90777	7.02759	1.06174	0.000999985	1127.31
360	M12593	finn-b-IPF	Idiopathic pulmonary fibrosis || id:finn-b-IPF	exposure	Weighted mode	24	0.139098	3.45228	0.968208	-6.62738	6.90557	1.14924	0.00132363	997.817
361	M12626	finn-b-IPF	Idiopathic pulmonary fibrosis || id:finn-b-IPF	exposure	MR Egger	8	-4.6961	12.8046	0.726391	-29.7931	20.4009	0.00913081	1.15e-13	724429187
362	M12626	finn-b-IPF	Idiopathic pulmonary fibrosis || id:finn-b-IPF	exposure	Weighted median	8	-0.864921	1.89076	0.64735	-4.57081	2.84097	0.421085	0.0103496	17.1323
363	M12626	finn-b-IPF	Idiopathic pulmonary fibrosis || id:finn-b-IPF	exposure	Inverse variance weighted	8	0.870402	1.7333	0.615551	-2.52686	4.26766	2.38787	0.0799098	71.3546
364	M12626	finn-b-IPF	Idiopathic pulmonary fibrosis || id:finn-b-IPF	exposure	Simple mode	8	-0.878571	2.63857	0.748906	-6.05017	4.29303	0.415376	0.00235745	73.1879
365	M12626	finn-b-IPF	Idiopathic pulmonary fibrosis || id:finn-b-IPF	exposure	Weighted mode	8	-0.878571	2.43502	0.728886	-5.65121	3.89406	0.415376	0.00351328	49.11
366	M12768	finn-b-IPF	Idiopathic pulmonary fibrosis || id:finn-b-IPF	exposure	MR Egger	18	-0.787312	1.2185	0.527353	-3.17557	1.60095	0.455066	0.0417702	4.95773
367	M12768	finn-b-IPF	Idiopathic pulmonary fibrosis || id:finn-b-IPF	exposure	Weighted median	18	-1.02446	0.987555	0.299565	-2.96006	0.911151	0.358991	0.0518156	2.48718
368	M12768	finn-b-IPF	Idiopathic pulmonary fibrosis || id:finn-b-IPF	exposure	Inverse variance weighted	18	0.018005	0.759946	0.981098	-1.47149	1.5075	1.01817	0.229583	4.51542
369	M12768	finn-b-IPF	Idiopathic pulmonary fibrosis || id:finn-b-IPF	exposure	Simple mode	18	-1.06892	2.03439	0.606073	-5.05632	2.91848	0.343379	0.00636895	18.5131
370	M12768	finn-b-IPF	Idiopathic pulmonary fibrosis || id:finn-b-IPF	exposure	Weighted mode	18	-1.06892	0.946378	0.274379	-2.92382	0.78598	0.343379	0.053728	2.19456
371	M12774	finn-b-IPF	Idiopathic pulmonary fibrosis || id:finn-b-IPF	exposure	MR Egger	29	1.04046	1.81541	0.571304	-2.51776	4.59867	2.83051	0.0806403	99.3519
372	M12774	finn-b-IPF	Idiopathic pulmonary fibrosis || id:finn-b-IPF	exposure	Weighted median	29	0.268906	1.08017	0.8034	-1.84822	2.38603	1.30853	0.157517	10.8703
373	M12774	finn-b-IPF	Idiopathic pulmonary fibrosis || id:finn-b-IPF	exposure	Inverse variance weighted	29	-0.164123	0.781548	0.833669	-1.69596	1.36771	0.848637	0.183423	3.92635
374	M12774	finn-b-IPF	Idiopathic pulmonary fibrosis || id:finn-b-IPF	exposure	Simple mode	29	-0.713587	1.95823	0.718294	-4.55171	3.12454	0.489884	0.0105491	22.7494
375	M12774	finn-b-IPF	Idiopathic pulmonary fibrosis || id:finn-b-IPF	exposure	Weighted mode	29	-0.13535	1.62225	0.934101	-3.31497	3.04427	0.87341	0.0363352	20.9947
376	M15122	finn-b-IPF	Idiopathic pulmonary fibrosis || id:finn-b-IPF	exposure	MR Egger	18	-0.066241	1.22454	0.957529	-2.46633	2.33385	0.935905	0.0848957	10.3176
377	M15122	finn-b-IPF	Idiopathic pulmonary fibrosis || id:finn-b-IPF	exposure	Weighted median	18	-0.895123	0.953288	0.347739	-2.76357	0.973322	0.408558	0.0630664	2.64672
378	M15122	finn-b-IPF	Idiopathic pulmonary fibrosis || id:finn-b-IPF	exposure	Inverse variance weighted	18	-0.882725	0.671016	0.18834	-2.19792	0.432466	0.413654	0.111034	1.54105
379	M15122	finn-b-IPF	Idiopathic pulmonary fibrosis || id:finn-b-IPF	exposure	Simple mode	18	-2.75873	1.785	0.140637	-6.25734	0.73988	0.0633723	0.00191634	2.09568
380	M15122	finn-b-IPF	Idiopathic pulmonary fibrosis || id:finn-b-IPF	exposure	Weighted mode	18	0.122166	0.948971	0.899078	-1.73782	1.98215	1.12994	0.175904	7.25832
381	M15140	finn-b-IPF	Idiopathic pulmonary fibrosis || id:finn-b-IPF	exposure	MR Egger	36	-1.90342	1.45911	0.200821	-4.76328	0.956432	0.149057	0.00853755	2.60239
382	M15140	finn-b-IPF	Idiopathic pulmonary fibrosis || id:finn-b-IPF	exposure	Weighted median	36	-1.48773	1.00518	0.138854	-3.45788	0.482413	0.225885	0.0314966	1.61998
383	M15140	finn-b-IPF	Idiopathic pulmonary fibrosis || id:finn-b-IPF	exposure	Inverse variance weighted	36	-0.498003	0.731122	0.495777	-1.931	0.934995	0.607743	0.145003	2.5472
384	M15140	finn-b-IPF	Idiopathic pulmonary fibrosis || id:finn-b-IPF	exposure	Simple mode	36	-3.84555	2.12082	0.0783787	-8.00236	0.311261	0.0213747	0.000334673	1.36515
385	M15140	finn-b-IPF	Idiopathic pulmonary fibrosis || id:finn-b-IPF	exposure	Weighted mode	36	-1.89117	1.26642	0.144316	-4.37336	0.591021	0.150895	0.0126087	1.80583
386	M15335	finn-b-IPF	Idiopathic pulmonary fibrosis || id:finn-b-IPF	exposure	MR Egger	12	0.794597	1.12616	0.496556	-1.41268	3.00187	2.21355	0.24349	20.1232
387	M15335	finn-b-IPF	Idiopathic pulmonary fibrosis || id:finn-b-IPF	exposure	Weighted median	12	-0.310439	0.368373	0.39938	-1.03245	0.411573	0.733125	0.356133	1.50919
388	M15335	finn-b-IPF	Idiopathic pulmonary fibrosis || id:finn-b-IPF	exposure	Inverse variance weighted	12	-0.292703	0.385322	0.447475	-1.04793	0.462528	0.746244	0.350661	1.58808
389	M15335	finn-b-IPF	Idiopathic pulmonary fibrosis || id:finn-b-IPF	exposure	Simple mode	12	-1.69141	0.692464	0.0326716	-3.04864	-0.334184	0.184259	0.0474233	0.715922
390	M15335	finn-b-IPF	Idiopathic pulmonary fibrosis || id:finn-b-IPF	exposure	Weighted mode	12	-0.300576	0.476816	0.54132	-1.23514	0.633984	0.740392	0.290795	1.88511
391	M15365	finn-b-IPF	Idiopathic pulmonary fibrosis || id:finn-b-IPF	exposure	MR Egger	13	2.60753	2.36723	0.294192	-2.03223	7.2473	13.5655	0.131043	1404.3
392	M15365	finn-b-IPF	Idiopathic pulmonary fibrosis || id:finn-b-IPF	exposure	Weighted median	13	1.29962	1.4865	0.381965	-1.61393	4.21317	3.66791	0.199104	67.5704
393	M15365	finn-b-IPF	Idiopathic pulmonary fibrosis || id:finn-b-IPF	exposure	Inverse variance weighted	13	1.33397	1.04394	0.201313	-0.712155	3.38009	3.79608	0.490586	29.3735
394	M15365	finn-b-IPF	Idiopathic pulmonary fibrosis || id:finn-b-IPF	exposure	Simple mode	13	1.51578	2.18981	0.501989	-2.77625	5.8078	4.55295	0.0622716	332.887
395	M15365	finn-b-IPF	Idiopathic pulmonary fibrosis || id:finn-b-IPF	exposure	Weighted mode	13	1.30111	1.81566	0.487332	-2.25758	4.8598	3.67336	0.104603	128.998
396	M15488	finn-b-IPF	Idiopathic pulmonary fibrosis || id:finn-b-IPF	exposure	MR Egger	17	0.755066	4.9315	0.880352	-8.91067	10.4208	2.12775	0.000134942	33550.2
397	M15488	finn-b-IPF	Idiopathic pulmonary fibrosis || id:finn-b-IPF	exposure	Weighted median	17	-1.07217	2.09431	0.608691	-5.17702	3.03269	0.342265	0.00564478	20.7529
398	M15488	finn-b-IPF	Idiopathic pulmonary fibrosis || id:finn-b-IPF	exposure	Inverse variance weighted	17	1.07035	1.50679	0.477487	-1.88296	4.02365	2.91639	0.15214	55.9048
399	M15488	finn-b-IPF	Idiopathic pulmonary fibrosis || id:finn-b-IPF	exposure	Simple mode	17	-1.33089	3.39192	0.699961	-7.97906	5.31728	0.264241	0.00034256	203.828
400	M15488	finn-b-IPF	Idiopathic pulmonary fibrosis || id:finn-b-IPF	exposure	Weighted mode	17	-1.54528	2.98516	0.611783	-7.39618	4.30563	0.213253	0.000613592	74.1159
401	M15500	finn-b-IPF	Idiopathic pulmonary fibrosis || id:finn-b-IPF	exposure	MR Egger	161	0.245178	2.45266	0.920499	-4.56204	5.05239	1.27785	0.0104407	156.397
402	M15500	finn-b-IPF	Idiopathic pulmonary fibrosis || id:finn-b-IPF	exposure	Weighted median	161	-0.61316	1.2327	0.618897	-3.02925	1.80293	0.541636	0.048352	6.06738
403	M15500	finn-b-IPF	Idiopathic pulmonary fibrosis || id:finn-b-IPF	exposure	Inverse variance weighted	161	-0.159325	0.771046	0.836295	-1.67058	1.35193	0.852719	0.188139	3.86486
404	M15500	finn-b-IPF	Idiopathic pulmonary fibrosis || id:finn-b-IPF	exposure	Simple mode	161	0.960563	3.18433	0.763308	-5.28072	7.20184	2.61317	0.00508877	1341.9
405	M15500	finn-b-IPF	Idiopathic pulmonary fibrosis || id:finn-b-IPF	exposure	Weighted mode	161	-1.28329	2.28551	0.575251	-5.76289	3.19632	0.277125	0.003142	24.4424
406	M15506	finn-b-IPF	Idiopathic pulmonary fibrosis || id:finn-b-IPF	exposure	MR Egger	23	-2.45381	4.41552	0.584272	-11.1082	6.20061	0.0859656	1.5e-05	493.048
407	M15506	finn-b-IPF	Idiopathic pulmonary fibrosis || id:finn-b-IPF	exposure	Weighted median	23	-0.189188	2.11582	0.928751	-4.3362	3.95782	0.827631	0.0130862	52.3432
408	M15506	finn-b-IPF	Idiopathic pulmonary fibrosis || id:finn-b-IPF	exposure	Inverse variance weighted	23	2.09231	1.59777	0.190358	-1.03932	5.22394	8.10361	0.353697	185.664
409	M15506	finn-b-IPF	Idiopathic pulmonary fibrosis || id:finn-b-IPF	exposure	Simple mode	23	-1.98403	3.78003	0.604921	-9.39288	5.42482	0.137514	8.33e-05	226.97
410	M15506	finn-b-IPF	Idiopathic pulmonary fibrosis || id:finn-b-IPF	exposure	Weighted mode	23	-1.5864	3.79873	0.680278	-9.0319	5.85911	0.204662	0.000119535	350.411
411	M15630	finn-b-IPF	Idiopathic pulmonary fibrosis || id:finn-b-IPF	exposure	MR Egger	14	0.218849	0.409595	0.602889	-0.583958	1.02166	1.24464	0.557686	2.77779
412	M15630	finn-b-IPF	Idiopathic pulmonary fibrosis || id:finn-b-IPF	exposure	Weighted median	14	0.319152	0.330072	0.333586	-0.327789	0.966093	1.37596	0.720515	2.62766
413	M15630	finn-b-IPF	Idiopathic pulmonary fibrosis || id:finn-b-IPF	exposure	Inverse variance weighted	14	0.363531	0.303532	0.231045	-0.231391	0.958453	1.4384	0.793429	2.60766
414	M15630	finn-b-IPF	Idiopathic pulmonary fibrosis || id:finn-b-IPF	exposure	Simple mode	14	1.22486	1.09722	0.28449	-0.925691	3.37541	3.40369	0.396257	29.2362
415	M15630	finn-b-IPF	Idiopathic pulmonary fibrosis || id:finn-b-IPF	exposure	Weighted mode	14	0.319	0.33519	0.35861	-0.337973	0.975972	1.37575	0.713215	2.65375
416	M15650	finn-b-IPF	Idiopathic pulmonary fibrosis || id:finn-b-IPF	exposure	MR Egger	8	4.37224	10.1224	0.680876	-15.4676	24.2121	79.2212	1.92e-07	32746204458
417	M15650	finn-b-IPF	Idiopathic pulmonary fibrosis || id:finn-b-IPF	exposure	Weighted median	8	-2.18506	3.69466	0.554246	-9.4266	5.05648	0.112471	8.06e-05	157.037
418	M15650	finn-b-IPF	Idiopathic pulmonary fibrosis || id:finn-b-IPF	exposure	Inverse variance weighted	8	-3.07787	2.74805	0.262706	-8.46405	2.30831	0.0460572	0.000210915	10.0574
419	M15650	finn-b-IPF	Idiopathic pulmonary fibrosis || id:finn-b-IPF	exposure	Simple mode	8	-2.39298	5.6467	0.684441	-13.4605	8.67456	0.0913567	1.43e-06	5852.1
420	M15650	finn-b-IPF	Idiopathic pulmonary fibrosis || id:finn-b-IPF	exposure	Weighted mode	8	-2.29953	4.22055	0.60278	-10.5718	5.97276	0.100306	2.56e-05	392.586
421	M15676	finn-b-IPF	Idiopathic pulmonary fibrosis || id:finn-b-IPF	exposure	MR Egger	32	1.68173	1.53882	0.28315	-1.33436	4.69782	5.37484	0.263326	109.708
422	M15676	finn-b-IPF	Idiopathic pulmonary fibrosis || id:finn-b-IPF	exposure	Weighted median	32	0.522497	1.12211	0.641475	-1.67684	2.72183	1.68623	0.186964	15.2082
423	M15676	finn-b-IPF	Idiopathic pulmonary fibrosis || id:finn-b-IPF	exposure	Inverse variance weighted	32	0.683843	0.773768	0.376813	-0.832742	2.20043	1.98148	0.434855	9.02887
424	M15676	finn-b-IPF	Idiopathic pulmonary fibrosis || id:finn-b-IPF	exposure	Simple mode	32	0.438615	2.02377	0.829837	-3.52797	4.4052	1.55056	0.0293644	81.8755
425	M15676	finn-b-IPF	Idiopathic pulmonary fibrosis || id:finn-b-IPF	exposure	Weighted mode	32	0.381404	1.5027	0.801317	-2.56389	3.3267	1.46434	0.0770043	27.8464
426	M15677	finn-b-IPF	Idiopathic pulmonary fibrosis || id:finn-b-IPF	exposure	MR Egger	8	0.276334	0.925605	0.775357	-1.53785	2.09052	1.31829	0.214842	8.08911
427	M15677	finn-b-IPF	Idiopathic pulmonary fibrosis || id:finn-b-IPF	exposure	Weighted median	8	0.0161381	0.494592	0.97397	-0.953263	0.985539	1.01627	0.385481	2.67926
428	M15677	finn-b-IPF	Idiopathic pulmonary fibrosis || id:finn-b-IPF	exposure	Inverse variance weighted	8	-0.136582	0.352859	0.698702	-0.828185	0.555021	0.872335	0.436842	1.74198
429	M15677	finn-b-IPF	Idiopathic pulmonary fibrosis || id:finn-b-IPF	exposure	Simple mode	8	-0.192329	0.707062	0.793461	-1.57817	1.19351	0.825035	0.206352	3.29864
430	M15677	finn-b-IPF	Idiopathic pulmonary fibrosis || id:finn-b-IPF	exposure	Weighted mode	8	-0.00474583	0.493765	0.992599	-0.972524	0.963033	0.995265	0.378127	2.61963
431	M15749	finn-b-IPF	Idiopathic pulmonary fibrosis || id:finn-b-IPF	exposure	MR Egger	14	0.53058	0.913823	0.572242	-1.26051	2.32167	1.69992	0.283509	10.1927
432	M15749	finn-b-IPF	Idiopathic pulmonary fibrosis || id:finn-b-IPF	exposure	Weighted median	14	0.178119	0.667226	0.789504	-1.12964	1.48588	1.19497	0.323148	4.41886
433	M15749	finn-b-IPF	Idiopathic pulmonary fibrosis || id:finn-b-IPF	exposure	Inverse variance weighted	14	0.56772	0.511874	0.267387	-0.435554	1.57099	1.76424	0.646906	4.81142
434	M15749	finn-b-IPF	Idiopathic pulmonary fibrosis || id:finn-b-IPF	exposure	Simple mode	14	1.61155	1.2574	0.222355	-0.852966	4.07606	5.01055	0.426149	58.9128
435	M15749	finn-b-IPF	Idiopathic pulmonary fibrosis || id:finn-b-IPF	exposure	Weighted mode	14	0.483863	0.700777	0.502043	-0.889659	1.85738	1.62233	0.410796	6.40696
436	M15753	finn-b-IPF	Idiopathic pulmonary fibrosis || id:finn-b-IPF	exposure	MR Egger	14	0.635244	1.08408	0.568749	-1.48955	2.76004	1.88748	0.225474	15.8004
437	M15753	finn-b-IPF	Idiopathic pulmonary fibrosis || id:finn-b-IPF	exposure	Weighted median	14	0.518825	0.54269	0.33906	-0.544847	1.5825	1.68005	0.579931	4.86709
438	M15753	finn-b-IPF	Idiopathic pulmonary fibrosis || id:finn-b-IPF	exposure	Inverse variance weighted	14	0.419724	0.525198	0.42419	-0.609664	1.44911	1.52154	0.543533	4.25933
439	M15753	finn-b-IPF	Idiopathic pulmonary fibrosis || id:finn-b-IPF	exposure	Simple mode	14	1.39303	0.964618	0.172369	-0.497616	3.28368	4.02705	0.607978	26.6739
440	M15753	finn-b-IPF	Idiopathic pulmonary fibrosis || id:finn-b-IPF	exposure	Weighted mode	14	0.575789	0.546009	0.310842	-0.49439	1.64597	1.77853	0.609943	5.18602
441	M15778	finn-b-IPF	Idiopathic pulmonary fibrosis || id:finn-b-IPF	exposure	MR Egger	35	1.9203	2.61197	0.467417	-3.19917	7.03976	6.82298	0.040796	1141.12
442	M15778	finn-b-IPF	Idiopathic pulmonary fibrosis || id:finn-b-IPF	exposure	Weighted median	35	1.09909	1.22085	0.367979	-1.29378	3.49196	3.00144	0.274232	32.8503
443	M15778	finn-b-IPF	Idiopathic pulmonary fibrosis || id:finn-b-IPF	exposure	Inverse variance weighted	35	0.373119	0.94186	0.691994	-1.47293	2.21916	1.45226	0.229254	9.19964
444	M15778	finn-b-IPF	Idiopathic pulmonary fibrosis || id:finn-b-IPF	exposure	Simple mode	35	1.68073	3.02898	0.582606	-4.25606	7.61752	5.36948	0.014178	2033.52
445	M15778	finn-b-IPF	Idiopathic pulmonary fibrosis || id:finn-b-IPF	exposure	Weighted mode	35	1.68073	2.30381	0.470666	-2.83474	6.1962	5.36948	0.0587338	490.881
446	M15958	finn-b-IPF	Idiopathic pulmonary fibrosis || id:finn-b-IPF	exposure	MR Egger	9	0.667678	0.841861	0.453759	-0.98237	2.31773	1.94971	0.374423	10.1526
447	M15958	finn-b-IPF	Idiopathic pulmonary fibrosis || id:finn-b-IPF	exposure	Weighted median	9	0.774019	0.668704	0.247071	-0.53664	2.08468	2.16846	0.584709	8.04201
448	M15958	finn-b-IPF	Idiopathic pulmonary fibrosis || id:finn-b-IPF	exposure	Inverse variance weighted	9	0.829973	0.562452	0.140043	-0.272434	1.93238	2.29326	0.761524	6.90592
449	M15958	finn-b-IPF	Idiopathic pulmonary fibrosis || id:finn-b-IPF	exposure	Simple mode	9	0.60873	1.4542	0.686519	-2.2415	3.45896	1.8381	0.106299	31.7839
450	M15958	finn-b-IPF	Idiopathic pulmonary fibrosis || id:finn-b-IPF	exposure	Weighted mode	9	0.784317	0.633611	0.250865	-0.45756	2.02619	2.19091	0.632826	7.58517
451	M15990	finn-b-IPF	Idiopathic pulmonary fibrosis || id:finn-b-IPF	exposure	MR Egger	18	0.34452	0.649877	0.603301	-0.929239	1.61828	1.41131	0.394854	5.0444
452	M15990	finn-b-IPF	Idiopathic pulmonary fibrosis || id:finn-b-IPF	exposure	Weighted median	18	0.442742	0.561783	0.430637	-0.658353	1.54384	1.55697	0.517703	4.68252
453	M15990	finn-b-IPF	Idiopathic pulmonary fibrosis || id:finn-b-IPF	exposure	Inverse variance weighted	18	0.394841	0.448221	0.378369	-0.483673	1.27336	1.48415	0.616515	3.57282
454	M15990	finn-b-IPF	Idiopathic pulmonary fibrosis || id:finn-b-IPF	exposure	Simple mode	18	-0.482634	1.44221	0.741983	-3.30936	2.34409	0.617155	0.0365395	10.4238
455	M15990	finn-b-IPF	Idiopathic pulmonary fibrosis || id:finn-b-IPF	exposure	Weighted mode	18	0.418698	0.536319	0.445721	-0.632486	1.46988	1.51998	0.531269	4.34872
456	M15996	finn-b-IPF	Idiopathic pulmonary fibrosis || id:finn-b-IPF	exposure	MR Egger	4	-1.31479	3.15256	0.717141	-7.4938	4.86422	0.268531	0.000556525	129.57
457	M15996	finn-b-IPF	Idiopathic pulmonary fibrosis || id:finn-b-IPF	exposure	Weighted median	4	-0.482859	1.30472	0.711317	-3.0401	2.07439	0.617017	0.0478299	7.95965
458	M15996	finn-b-IPF	Idiopathic pulmonary fibrosis || id:finn-b-IPF	exposure	Inverse variance weighted	4	-0.238642	1.10968	0.829724	-2.41361	1.93633	0.787697	0.0894917	6.93323
459	M15996	finn-b-IPF	Idiopathic pulmonary fibrosis || id:finn-b-IPF	exposure	Simple mode	4	-0.429798	1.62364	0.808377	-3.61214	2.75255	0.650641	0.026994	15.6825
460	M15996	finn-b-IPF	Idiopathic pulmonary fibrosis || id:finn-b-IPF	exposure	Weighted mode	4	-0.727847	1.5835	0.677035	-3.83151	2.37582	0.482948	0.0216768	10.7598
461	M16634	finn-b-IPF	Idiopathic pulmonary fibrosis || id:finn-b-IPF	exposure	MR Egger	10	1.49194	1.29194	0.281497	-1.04026	4.02413	4.44569	0.353362	55.9318
462	M16634	finn-b-IPF	Idiopathic pulmonary fibrosis || id:finn-b-IPF	exposure	Weighted median	10	-0.126424	0.792025	0.87318	-1.67879	1.42595	0.881241	0.186599	4.16179
463	M16634	finn-b-IPF	Idiopathic pulmonary fibrosis || id:finn-b-IPF	exposure	Inverse variance weighted	10	-0.918477	0.615369	0.135552	-2.1246	0.287646	0.399126	0.119481	1.33329
464	M16634	finn-b-IPF	Idiopathic pulmonary fibrosis || id:finn-b-IPF	exposure	Simple mode	10	-0.00868803	1.0197	0.993388	-2.0073	1.98992	0.99135	0.134351	7.31497
465	M16634	finn-b-IPF	Idiopathic pulmonary fibrosis || id:finn-b-IPF	exposure	Weighted mode	10	-0.0652717	1.02419	0.950578	-2.07267	1.94213	0.936813	0.125849	6.9736
466	M16816	finn-b-IPF	Idiopathic pulmonary fibrosis || id:finn-b-IPF	exposure	MR Egger	14	-1.79456	1.44766	0.238808	-4.63198	1.04285	0.1662	0.00973547	2.8373
467	M16816	finn-b-IPF	Idiopathic pulmonary fibrosis || id:finn-b-IPF	exposure	Weighted median	14	-0.924157	1.13876	0.41705	-3.15612	1.3078	0.396866	0.0425908	3.69804
468	M16816	finn-b-IPF	Idiopathic pulmonary fibrosis || id:finn-b-IPF	exposure	Inverse variance weighted	14	-0.496859	0.831919	0.550344	-2.12742	1.1337	0.608439	0.119144	3.10714
469	M16816	finn-b-IPF	Idiopathic pulmonary fibrosis || id:finn-b-IPF	exposure	Simple mode	14	1.74408	2.11978	0.425477	-2.41069	5.89886	5.72066	0.0897531	364.622
470	M16816	finn-b-IPF	Idiopathic pulmonary fibrosis || id:finn-b-IPF	exposure	Weighted mode	14	-1.32035	1.17533	0.281589	-3.62399	0.983285	0.267041	0.026676	2.67322
471	M16818	finn-b-IPF	Idiopathic pulmonary fibrosis || id:finn-b-IPF	exposure	MR Egger	11	-1.45427	1.75175	0.427907	-4.8877	1.97916	0.23357	0.00753872	7.23664
472	M16818	finn-b-IPF	Idiopathic pulmonary fibrosis || id:finn-b-IPF	exposure	Weighted median	11	0.487953	0.982857	0.619567	-1.43845	2.41435	1.62898	0.237296	11.1825
473	M16818	finn-b-IPF	Idiopathic pulmonary fibrosis || id:finn-b-IPF	exposure	Inverse variance weighted	11	0.549562	0.739493	0.457385	-0.899845	1.99897	1.73249	0.406633	7.38144
474	M16818	finn-b-IPF	Idiopathic pulmonary fibrosis || id:finn-b-IPF	exposure	Simple mode	11	0.775503	1.44044	0.602093	-2.04777	3.59877	2.17168	0.129023	36.5533
475	M16818	finn-b-IPF	Idiopathic pulmonary fibrosis || id:finn-b-IPF	exposure	Weighted mode	11	0.183462	1.26013	0.887138	-2.2864	2.65332	1.20137	0.101632	14.2012
476	M16821	finn-b-IPF	Idiopathic pulmonary fibrosis || id:finn-b-IPF	exposure	MR Egger	20	-0.678735	1.61846	0.679908	-3.85092	2.49345	0.507258	0.0212602	12.103
477	M16821	finn-b-IPF	Idiopathic pulmonary fibrosis || id:finn-b-IPF	exposure	Weighted median	20	0.0805163	0.90951	0.929458	-1.70212	1.86316	1.08385	0.182296	6.44404
478	M16821	finn-b-IPF	Idiopathic pulmonary fibrosis || id:finn-b-IPF	exposure	Inverse variance weighted	20	0.929989	0.673334	0.167226	-0.389745	2.24972	2.53448	0.677229	9.48511
479	M16821	finn-b-IPF	Idiopathic pulmonary fibrosis || id:finn-b-IPF	exposure	Simple mode	20	-0.118356	1.35335	0.931226	-2.77092	2.53421	0.88838	0.0626046	12.6064
480	M16821	finn-b-IPF	Idiopathic pulmonary fibrosis || id:finn-b-IPF	exposure	Weighted mode	20	0.0817261	1.0551	0.939069	-1.98628	2.14973	1.08516	0.137205	8.58256
481	M16822	finn-b-IPF	Idiopathic pulmonary fibrosis || id:finn-b-IPF	exposure	MR Egger	20	1.88105	3.61882	0.60954	-5.21185	8.97394	6.56037	0.00545159	7894.66
482	M16822	finn-b-IPF	Idiopathic pulmonary fibrosis || id:finn-b-IPF	exposure	Weighted median	20	0.116138	1.15938	0.920208	-2.15625	2.38852	1.12315	0.115759	10.8974
483	M16822	finn-b-IPF	Idiopathic pulmonary fibrosis || id:finn-b-IPF	exposure	Inverse variance weighted	20	0.0565673	0.860156	0.947566	-1.62934	1.74247	1.0582	0.196059	5.71145
484	M16822	finn-b-IPF	Idiopathic pulmonary fibrosis || id:finn-b-IPF	exposure	Simple mode	20	-0.0503734	2.0991	0.981105	-4.1646	4.06385	0.950874	0.0155359	58.1982
485	M16822	finn-b-IPF	Idiopathic pulmonary fibrosis || id:finn-b-IPF	exposure	Weighted mode	20	-0.148724	2.01125	0.941826	-4.09077	3.79332	0.861807	0.0167264	44.4035
486	M16823	finn-b-IPF	Idiopathic pulmonary fibrosis || id:finn-b-IPF	exposure	MR Egger	11	0.25724	0.370498	0.505015	-0.468936	0.983415	1.29336	0.625668	2.67357
487	M16823	finn-b-IPF	Idiopathic pulmonary fibrosis || id:finn-b-IPF	exposure	Weighted median	11	0.331832	0.257506	0.197523	-0.172879	0.836544	1.39352	0.841239	2.30838
488	M16823	finn-b-IPF	Idiopathic pulmonary fibrosis || id:finn-b-IPF	exposure	Inverse variance weighted	11	0.221122	0.186976	0.236958	-0.145351	0.587596	1.24748	0.864719	1.79966
489	M16823	finn-b-IPF	Idiopathic pulmonary fibrosis || id:finn-b-IPF	exposure	Simple mode	11	0.606314	0.428134	0.18711	-0.232829	1.44546	1.83366	0.792289	4.24379
490	M16823	finn-b-IPF	Idiopathic pulmonary fibrosis || id:finn-b-IPF	exposure	Weighted mode	11	0.315911	0.323653	0.352046	-0.318449	0.950272	1.37151	0.727276	2.58641
491	M17799	finn-b-IPF	Idiopathic pulmonary fibrosis || id:finn-b-IPF	exposure	MR Egger	104	-0.0930079	0.216906	0.668977	-0.518143	0.332127	0.911186	0.595626	1.39393
492	M17799	finn-b-IPF	Idiopathic pulmonary fibrosis || id:finn-b-IPF	exposure	Weighted median	104	-0.021279	0.111488	0.848632	-0.239795	0.197237	0.978946	0.786789	1.21803
493	M17799	finn-b-IPF	Idiopathic pulmonary fibrosis || id:finn-b-IPF	exposure	Inverse variance weighted	104	-0.0393426	0.0732327	0.591111	-0.182879	0.104193	0.961421	0.832869	1.10982
494	M17799	finn-b-IPF	Idiopathic pulmonary fibrosis || id:finn-b-IPF	exposure	Simple mode	104	-0.075564	0.27102	0.780947	-0.606762	0.455634	0.92722	0.545113	1.57717
495	M17799	finn-b-IPF	Idiopathic pulmonary fibrosis || id:finn-b-IPF	exposure	Weighted mode	104	-0.0185059	0.221932	0.933707	-0.453493	0.416481	0.981664	0.635405	1.51661
496	M17805	finn-b-IPF	Idiopathic pulmonary fibrosis || id:finn-b-IPF	exposure	MR Egger	9	0.562655	3.46959	0.875756	-6.23774	7.36305	1.75533	0.00195427	1576.64
497	M17805	finn-b-IPF	Idiopathic pulmonary fibrosis || id:finn-b-IPF	exposure	Weighted median	9	0.787582	1.27922	0.538109	-1.71969	3.29485	2.19808	0.179122	26.9734
498	M17805	finn-b-IPF	Idiopathic pulmonary fibrosis || id:finn-b-IPF	exposure	Inverse variance weighted	9	1.44827	1.01907	0.155267	-0.549104	3.44564	4.25575	0.577467	31.3635
499	M17805	finn-b-IPF	Idiopathic pulmonary fibrosis || id:finn-b-IPF	exposure	Simple mode	9	0.532691	1.90072	0.786391	-3.19273	4.25811	1.70351	0.0410597	70.6764
500	M17805	finn-b-IPF	Idiopathic pulmonary fibrosis || id:finn-b-IPF	exposure	Weighted mode	9	0.703103	1.4458	0.639792	-2.13067	3.53688	2.02001	0.118757	34.3595
501	M17807	finn-b-IPF	Idiopathic pulmonary fibrosis || id:finn-b-IPF	exposure	MR Egger	20	-0.386116	0.710192	0.593334	-1.77809	1.00586	0.679692	0.16896	2.73426
502	M17807	finn-b-IPF	Idiopathic pulmonary fibrosis || id:finn-b-IPF	exposure	Weighted median	20	-0.487321	0.455396	0.284573	-1.3799	0.405256	0.61427	0.251604	1.49969
503	M17807	finn-b-IPF	Idiopathic pulmonary fibrosis || id:finn-b-IPF	exposure	Inverse variance weighted	20	-0.522335	0.339653	0.124086	-1.18806	0.143385	0.593134	0.304813	1.15417
504	M17807	finn-b-IPF	Idiopathic pulmonary fibrosis || id:finn-b-IPF	exposure	Simple mode	20	-0.478884	0.756986	0.534522	-1.96258	1.00481	0.619474	0.140496	2.73138
505	M17807	finn-b-IPF	Idiopathic pulmonary fibrosis || id:finn-b-IPF	exposure	Weighted mode	20	-0.679195	0.651639	0.31036	-1.95641	0.598016	0.507025	0.141365	1.81851
506	M17945	finn-b-IPF	Idiopathic pulmonary fibrosis || id:finn-b-IPF	exposure	MR Egger	34	-0.0798879	1.33674	0.952716	-2.69989	2.54011	0.92322	0.0672129	12.6811
507	M17945	finn-b-IPF	Idiopathic pulmonary fibrosis || id:finn-b-IPF	exposure	Weighted median	34	0.309879	1.1718	0.791436	-1.98686	2.60661	1.36326	0.137126	13.5531
508	M17945	finn-b-IPF	Idiopathic pulmonary fibrosis || id:finn-b-IPF	exposure	Inverse variance weighted	34	1.02993	0.747427	0.168214	-0.435029	2.49488	2.80086	0.647246	12.1203
509	M17945	finn-b-IPF	Idiopathic pulmonary fibrosis || id:finn-b-IPF	exposure	Simple mode	34	1.05659	2.36528	0.658003	-3.57936	5.69254	2.87655	0.0278936	296.646
510	M17945	finn-b-IPF	Idiopathic pulmonary fibrosis || id:finn-b-IPF	exposure	Weighted mode	34	0.376267	1.10694	0.736073	-1.79333	2.54587	1.45684	0.166405	12.7543
511	M18254	finn-b-IPF	Idiopathic pulmonary fibrosis || id:finn-b-IPF	exposure	MR Egger	13	-0.927766	1.00087	0.373838	-2.88947	1.03394	0.395436	0.0556057	2.81211
512	M18254	finn-b-IPF	Idiopathic pulmonary fibrosis || id:finn-b-IPF	exposure	Weighted median	13	-0.401019	0.47036	0.393893	-1.32293	0.520887	0.669637	0.266355	1.68352
513	M18254	finn-b-IPF	Idiopathic pulmonary fibrosis || id:finn-b-IPF	exposure	Inverse variance weighted	13	-0.51895	0.32972	0.115508	-1.1652	0.1273	0.595145	0.31186	1.13576
514	M18254	finn-b-IPF	Idiopathic pulmonary fibrosis || id:finn-b-IPF	exposure	Simple mode	13	-0.176599	0.722303	0.810978	-1.59231	1.23912	0.838116	0.203454	3.45256
515	M18254	finn-b-IPF	Idiopathic pulmonary fibrosis || id:finn-b-IPF	exposure	Weighted mode	13	-0.367757	0.576293	0.535369	-1.49729	0.761776	0.692285	0.223735	2.14208
516	M18281	finn-b-IPF	Idiopathic pulmonary fibrosis || id:finn-b-IPF	exposure	MR Egger	13	0.0954954	0.175757	0.597735	-0.248988	0.439978	1.1002	0.77959	1.55267
517	M18281	finn-b-IPF	Idiopathic pulmonary fibrosis || id:finn-b-IPF	exposure	Weighted median	13	0.055242	0.131728	0.67495	-0.202945	0.313429	1.0568	0.816323	1.36811
518	M18281	finn-b-IPF	Idiopathic pulmonary fibrosis || id:finn-b-IPF	exposure	Inverse variance weighted	13	-0.00842798	0.0933761	0.928082	-0.191445	0.174589	0.991607	0.825765	1.19076
519	M18281	finn-b-IPF	Idiopathic pulmonary fibrosis || id:finn-b-IPF	exposure	Simple mode	13	-0.260746	0.238385	0.295511	-0.72798	0.206488	0.770476	0.482883	1.22935
520	M18281	finn-b-IPF	Idiopathic pulmonary fibrosis || id:finn-b-IPF	exposure	Weighted mode	13	0.095769	0.127244	0.466173	-0.153628	0.345166	1.1005	0.857591	1.41222
521	M18283	finn-b-IPF	Idiopathic pulmonary fibrosis || id:finn-b-IPF	exposure	MR Egger	10	-0.639824	1.44223	0.669059	-3.46659	2.18694	0.527385	0.0312233	8.90792
522	M18283	finn-b-IPF	Idiopathic pulmonary fibrosis || id:finn-b-IPF	exposure	Weighted median	10	0.0624873	0.670742	0.925775	-1.25217	1.37714	1.06448	0.285884	3.96356
523	M18283	finn-b-IPF	Idiopathic pulmonary fibrosis || id:finn-b-IPF	exposure	Inverse variance weighted	10	0.0205236	0.477821	0.965739	-0.916006	0.957054	1.02074	0.400114	2.60401
524	M18283	finn-b-IPF	Idiopathic pulmonary fibrosis || id:finn-b-IPF	exposure	Simple mode	10	-0.337854	0.94982	0.730257	-2.1995	1.52379	0.713299	0.110859	4.5896
525	M18283	finn-b-IPF	Idiopathic pulmonary fibrosis || id:finn-b-IPF	exposure	Weighted mode	10	0.0122362	0.854859	0.988892	-1.66329	1.68776	1.01231	0.189515	5.40735
526	M18335	finn-b-IPF	Idiopathic pulmonary fibrosis || id:finn-b-IPF	exposure	MR Egger	6	-0.939968	1.06813	0.428547	-3.0335	1.15356	0.39064	0.0481468	3.16947
527	M18335	finn-b-IPF	Idiopathic pulmonary fibrosis || id:finn-b-IPF	exposure	Weighted median	6	-0.302568	0.470744	0.520391	-1.22523	0.62009	0.738919	0.293692	1.8591
528	M18335	finn-b-IPF	Idiopathic pulmonary fibrosis || id:finn-b-IPF	exposure	Inverse variance weighted	6	-0.0780057	0.381811	0.838116	-0.826355	0.670344	0.924959	0.437642	1.95491
529	M18335	finn-b-IPF	Idiopathic pulmonary fibrosis || id:finn-b-IPF	exposure	Simple mode	6	-0.370379	0.628478	0.581262	-1.6022	0.861439	0.690473	0.201453	2.36656
530	M18335	finn-b-IPF	Idiopathic pulmonary fibrosis || id:finn-b-IPF	exposure	Weighted mode	6	-0.345748	0.575032	0.573879	-1.47281	0.781313	0.707691	0.22928	2.18434
531	M18349	finn-b-IPF	Idiopathic pulmonary fibrosis || id:finn-b-IPF	exposure	MR Egger	16	-1.49031	1.34524	0.286603	-4.12699	1.14637	0.225303	0.0161314	3.14674
532	M18349	finn-b-IPF	Idiopathic pulmonary fibrosis || id:finn-b-IPF	exposure	Weighted median	16	-0.555881	1.00068	0.578549	-2.51721	1.40545	0.573567	0.0806846	4.07734
533	M18349	finn-b-IPF	Idiopathic pulmonary fibrosis || id:finn-b-IPF	exposure	Inverse variance weighted	16	0.158985	0.748209	0.831727	-1.3075	1.62547	1.17232	0.270494	5.08083
534	M18349	finn-b-IPF	Idiopathic pulmonary fibrosis || id:finn-b-IPF	exposure	Simple mode	16	3.79582	1.85858	0.0591077	0.153016	7.43863	44.5149	1.16534	1700.42
535	M18349	finn-b-IPF	Idiopathic pulmonary fibrosis || id:finn-b-IPF	exposure	Weighted mode	16	-0.6117	0.936418	0.523493	-2.44708	1.22368	0.542428	0.0865461	3.39967
536	M18357	finn-b-IPF	Idiopathic pulmonary fibrosis || id:finn-b-IPF	exposure	MR Egger	7	3.16761	2.42761	0.248775	-1.59051	7.92573	23.7508	0.203823	2767.6
537	M18357	finn-b-IPF	Idiopathic pulmonary fibrosis || id:finn-b-IPF	exposure	Weighted median	7	0.243633	0.671554	0.716762	-1.07261	1.55988	1.27588	0.342114	4.75824
538	M18357	finn-b-IPF	Idiopathic pulmonary fibrosis || id:finn-b-IPF	exposure	Inverse variance weighted	7	0.10572	0.53281	0.842717	-0.938587	1.15003	1.11151	0.39118	3.15828
539	M18357	finn-b-IPF	Idiopathic pulmonary fibrosis || id:finn-b-IPF	exposure	Simple mode	7	0.0135666	1.15403	0.991002	-2.24833	2.27546	1.01366	0.105575	9.73242
540	M18357	finn-b-IPF	Idiopathic pulmonary fibrosis || id:finn-b-IPF	exposure	Weighted mode	7	0.389223	1.12525	0.741224	-1.81626	2.59471	1.47583	0.162633	13.3927
541	M18369	finn-b-IPF	Idiopathic pulmonary fibrosis || id:finn-b-IPF	exposure	MR Egger	33	0.466563	1.982	0.815447	-3.41816	4.35129	1.5945	0.0327726	77.5784
542	M18369	finn-b-IPF	Idiopathic pulmonary fibrosis || id:finn-b-IPF	exposure	Weighted median	33	-0.291513	1.24191	0.814418	-2.72565	2.14262	0.747132	0.0655036	8.52177
543	M18369	finn-b-IPF	Idiopathic pulmonary fibrosis || id:finn-b-IPF	exposure	Inverse variance weighted	33	-0.140143	0.908799	0.877446	-1.92139	1.6411	0.869234	0.146403	5.16086
544	M18369	finn-b-IPF	Idiopathic pulmonary fibrosis || id:finn-b-IPF	exposure	Simple mode	33	-1.98508	2.29696	0.3939	-6.48712	2.51696	0.13737	0.00152294	12.3909
545	M18369	finn-b-IPF	Idiopathic pulmonary fibrosis || id:finn-b-IPF	exposure	Weighted mode	33	-1.04832	1.77971	0.559969	-4.53655	2.43991	0.350526	0.0107103	11.472
546	M18392	finn-b-IPF	Idiopathic pulmonary fibrosis || id:finn-b-IPF	exposure	MR Egger	4	-6.23799	6.2353	0.422484	-18.4592	5.9832	0.00195378	9.62e-09	396.709
547	M18392	finn-b-IPF	Idiopathic pulmonary fibrosis || id:finn-b-IPF	exposure	Weighted median	4	-0.416884	1.02326	0.683707	-2.42247	1.5887	0.659097	0.0887025	4.89737
548	M18392	finn-b-IPF	Idiopathic pulmonary fibrosis || id:finn-b-IPF	exposure	Inverse variance weighted	4	-0.811919	0.837566	0.332356	-2.45355	0.82971	0.444005	0.085988	2.29265
549	M18392	finn-b-IPF	Idiopathic pulmonary fibrosis || id:finn-b-IPF	exposure	Simple mode	4	-0.243494	1.44736	0.877103	-3.08032	2.59334	0.783884	0.0459443	13.3743
550	M18392	finn-b-IPF	Idiopathic pulmonary fibrosis || id:finn-b-IPF	exposure	Weighted mode	4	-0.190421	1.26039	0.889499	-2.66079	2.27994	0.826611	0.0698932	9.77614
551	M18394	finn-b-IPF	Idiopathic pulmonary fibrosis || id:finn-b-IPF	exposure	MR Egger	13	-0.845062	1.01681	0.423594	-2.838	1.14788	0.429531	0.0585424	3.15151
552	M18394	finn-b-IPF	Idiopathic pulmonary fibrosis || id:finn-b-IPF	exposure	Weighted median	13	0.0278781	0.507491	0.956192	-0.966805	1.02256	1.02827	0.380296	2.78031
553	M18394	finn-b-IPF	Idiopathic pulmonary fibrosis || id:finn-b-IPF	exposure	Inverse variance weighted	13	-0.333866	0.438909	0.446853	-1.19413	0.526395	0.71615	0.302968	1.69282
554	M18394	finn-b-IPF	Idiopathic pulmonary fibrosis || id:finn-b-IPF	exposure	Simple mode	13	-0.692008	0.91266	0.462944	-2.48082	1.09681	0.50057	0.0836744	2.99459
555	M18394	finn-b-IPF	Idiopathic pulmonary fibrosis || id:finn-b-IPF	exposure	Weighted mode	13	0.0923969	0.619151	0.88385	-1.12114	1.30593	1.0968	0.325908	3.69113
556	M18467	finn-b-IPF	Idiopathic pulmonary fibrosis || id:finn-b-IPF	exposure	MR Egger	12	-0.99446	1.72238	0.576454	-4.37033	2.38141	0.369923	0.0126471	10.8202
557	M18467	finn-b-IPF	Idiopathic pulmonary fibrosis || id:finn-b-IPF	exposure	Weighted median	12	-0.395684	0.827666	0.632599	-2.01791	1.22654	0.673219	0.132933	3.40942
558	M18467	finn-b-IPF	Idiopathic pulmonary fibrosis || id:finn-b-IPF	exposure	Inverse variance weighted	12	-0.196311	0.745967	0.792425	-1.65841	1.26578	0.821757	0.190442	3.54587
559	M18467	finn-b-IPF	Idiopathic pulmonary fibrosis || id:finn-b-IPF	exposure	Simple mode	12	-0.331161	1.27357	0.799647	-2.82736	2.16504	0.71809	0.0591688	8.71495
560	M18467	finn-b-IPF	Idiopathic pulmonary fibrosis || id:finn-b-IPF	exposure	Weighted mode	12	-0.221215	0.889015	0.808076	-1.96368	1.52125	0.801544	0.14034	4.57796
561	M18474	finn-b-IPF	Idiopathic pulmonary fibrosis || id:finn-b-IPF	exposure	MR Egger	11	0.219623	0.199183	0.298803	-0.170776	0.610022	1.24561	0.84301	1.84047
562	M18474	finn-b-IPF	Idiopathic pulmonary fibrosis || id:finn-b-IPF	exposure	Weighted median	11	0.0709859	0.179978	0.693275	-0.281771	0.423743	1.07357	0.754446	1.52767
563	M18474	finn-b-IPF	Idiopathic pulmonary fibrosis || id:finn-b-IPF	exposure	Inverse variance weighted	11	-0.0105821	0.132717	0.936449	-0.270707	0.249542	0.989474	0.76284	1.28344
564	M18474	finn-b-IPF	Idiopathic pulmonary fibrosis || id:finn-b-IPF	exposure	Simple mode	11	-0.104764	0.267214	0.703241	-0.628504	0.418976	0.900537	0.533389	1.5204
565	M18474	finn-b-IPF	Idiopathic pulmonary fibrosis || id:finn-b-IPF	exposure	Weighted mode	11	0.118856	0.182153	0.528787	-0.238163	0.475876	1.12621	0.788074	1.60942
566	M18476	finn-b-IPF	Idiopathic pulmonary fibrosis || id:finn-b-IPF	exposure	MR Egger	7	-0.360858	1.08926	0.753861	-2.4958	1.77408	0.697078	0.0824305	5.89488
567	M18476	finn-b-IPF	Idiopathic pulmonary fibrosis || id:finn-b-IPF	exposure	Weighted median	7	-0.0462649	0.618134	0.940337	-1.25781	1.16528	0.954789	0.284277	3.20681
568	M18476	finn-b-IPF	Idiopathic pulmonary fibrosis || id:finn-b-IPF	exposure	Inverse variance weighted	7	-0.33293	0.493528	0.499935	-1.30025	0.634385	0.71682	0.272465	1.88586
569	M18476	finn-b-IPF	Idiopathic pulmonary fibrosis || id:finn-b-IPF	exposure	Simple mode	7	0.735645	1.0296	0.501761	-1.28238	2.75367	2.08683	0.277376	15.7001
570	M18476	finn-b-IPF	Idiopathic pulmonary fibrosis || id:finn-b-IPF	exposure	Weighted mode	7	0.146065	0.696264	0.840778	-1.21861	1.51074	1.15727	0.29564	4.5301
571	M18477	finn-b-IPF	Idiopathic pulmonary fibrosis || id:finn-b-IPF	exposure	MR Egger	6	-0.503201	1.01684	0.646643	-2.49621	1.48981	0.604592	0.0823968	4.43624
572	M18477	finn-b-IPF	Idiopathic pulmonary fibrosis || id:finn-b-IPF	exposure	Weighted median	6	-0.138474	0.334671	0.67905	-0.79443	0.517482	0.870686	0.451839	1.6778
573	M18477	finn-b-IPF	Idiopathic pulmonary fibrosis || id:finn-b-IPF	exposure	Inverse variance weighted	6	0.143924	0.259541	0.579215	-0.364777	0.652625	1.1548	0.694351	1.92058
574	M18477	finn-b-IPF	Idiopathic pulmonary fibrosis || id:finn-b-IPF	exposure	Simple mode	6	-0.0831666	0.467639	0.865826	-0.999738	0.833405	0.920198	0.367976	2.30114
575	M18477	finn-b-IPF	Idiopathic pulmonary fibrosis || id:finn-b-IPF	exposure	Weighted mode	6	-0.144352	0.402206	0.734327	-0.932676	0.643972	0.865583	0.393499	1.90403
576	M18494	finn-b-IPF	Idiopathic pulmonary fibrosis || id:finn-b-IPF	exposure	MR Egger	13	-0.0954594	0.586104	0.873573	-1.24422	1.0533	0.908955	0.288165	2.86711
577	M18494	finn-b-IPF	Idiopathic pulmonary fibrosis || id:finn-b-IPF	exposure	Weighted median	13	-0.184802	0.378145	0.625049	-0.925965	0.556361	0.831269	0.396149	1.74431
578	M18494	finn-b-IPF	Idiopathic pulmonary fibrosis || id:finn-b-IPF	exposure	Inverse variance weighted	13	0.116031	0.334365	0.728577	-0.539324	0.771385	1.12303	0.583142	2.16276
579	M18494	finn-b-IPF	Idiopathic pulmonary fibrosis || id:finn-b-IPF	exposure	Simple mode	13	-0.157003	0.527848	0.771218	-1.19159	0.87758	0.854702	0.303739	2.40507
580	M18494	finn-b-IPF	Idiopathic pulmonary fibrosis || id:finn-b-IPF	exposure	Weighted mode	13	-0.248407	0.402823	0.548976	-1.03794	0.541125	0.780042	0.354184	1.71794
581	M18497	finn-b-IPF	Idiopathic pulmonary fibrosis || id:finn-b-IPF	exposure	MR Egger	16	0.265745	0.363403	0.476678	-0.446525	0.978016	1.3044	0.639847	2.65918
582	M18497	finn-b-IPF	Idiopathic pulmonary fibrosis || id:finn-b-IPF	exposure	Weighted median	16	-0.462146	0.330477	0.161986	-1.10988	0.185589	0.62993	0.329598	1.20393
583	M18497	finn-b-IPF	Idiopathic pulmonary fibrosis || id:finn-b-IPF	exposure	Inverse variance weighted	16	-0.233658	0.227578	0.304553	-0.67971	0.212394	0.791632	0.506764	1.23663
584	M18497	finn-b-IPF	Idiopathic pulmonary fibrosis || id:finn-b-IPF	exposure	Simple mode	16	-0.747416	0.616545	0.24416	-1.95584	0.461012	0.473589	0.141445	1.58568
585	M18497	finn-b-IPF	Idiopathic pulmonary fibrosis || id:finn-b-IPF	exposure	Weighted mode	16	-0.582706	0.455916	0.220639	-1.4763	0.31089	0.558385	0.228481	1.36464
586	M18929	finn-b-IPF	Idiopathic pulmonary fibrosis || id:finn-b-IPF	exposure	MR Egger	12	3.09554	2.97101	0.321985	-2.72764	8.91871	22.0991	0.0653736	7470.46
587	M18929	finn-b-IPF	Idiopathic pulmonary fibrosis || id:finn-b-IPF	exposure	Weighted median	12	1.39524	1.41431	0.323883	-1.37682	4.16729	4.03593	0.25238	64.5406
588	M18929	finn-b-IPF	Idiopathic pulmonary fibrosis || id:finn-b-IPF	exposure	Inverse variance weighted	12	0.183782	1.18457	0.876706	-2.13797	2.50554	1.20175	0.117894	12.2501
589	M18929	finn-b-IPF	Idiopathic pulmonary fibrosis || id:finn-b-IPF	exposure	Simple mode	12	1.3529	2.34982	0.576375	-3.25275	5.95856	3.86865	0.0386677	387.053
590	M18929	finn-b-IPF	Idiopathic pulmonary fibrosis || id:finn-b-IPF	exposure	Weighted mode	12	1.41317	1.5012	0.366733	-1.52918	4.35552	4.10896	0.216714	77.9071
591	M19323	finn-b-IPF	Idiopathic pulmonary fibrosis || id:finn-b-IPF	exposure	MR Egger	6	1.60339	1.64958	0.386091	-1.62978	4.83656	4.96985	0.195972	126.036
592	M19323	finn-b-IPF	Idiopathic pulmonary fibrosis || id:finn-b-IPF	exposure	Weighted median	6	-1.94191	1.19326	0.103652	-4.28071	0.396876	0.143429	0.0138329	1.48717
593	M19323	finn-b-IPF	Idiopathic pulmonary fibrosis || id:finn-b-IPF	exposure	Inverse variance weighted	6	-0.909425	0.95115	0.339006	-2.77368	0.954829	0.402756	0.0624319	2.59823
594	M19323	finn-b-IPF	Idiopathic pulmonary fibrosis || id:finn-b-IPF	exposure	Simple mode	6	-2.65065	2.04876	0.252279	-6.66621	1.36492	0.0706056	0.00127321	3.91542
595	M19323	finn-b-IPF	Idiopathic pulmonary fibrosis || id:finn-b-IPF	exposure	Weighted mode	6	1.24423	1.2027	0.348307	-1.11306	3.60151	3.47025	0.328552	36.6537
596	M19324	finn-b-IPF	Idiopathic pulmonary fibrosis || id:finn-b-IPF	exposure	MR Egger	7	0.933883	1.15235	0.454529	-1.32473	3.19249	2.54437	0.265875	24.3491
597	M19324	finn-b-IPF	Idiopathic pulmonary fibrosis || id:finn-b-IPF	exposure	Weighted median	7	1.1147	0.821708	0.174921	-0.495851	2.72524	3.04864	0.609053	15.2601
598	M19324	finn-b-IPF	Idiopathic pulmonary fibrosis || id:finn-b-IPF	exposure	Inverse variance weighted	7	1.10191	0.624336	0.0775764	-0.121792	2.3256	3.0099	0.885332	10.2329
599	M19324	finn-b-IPF	Idiopathic pulmonary fibrosis || id:finn-b-IPF	exposure	Simple mode	7	1.27728	1.09838	0.289034	-0.875545	3.43011	3.58688	0.416635	30.88
600	M19324	finn-b-IPF	Idiopathic pulmonary fibrosis || id:finn-b-IPF	exposure	Weighted mode	7	1.12749	0.882656	0.248667	-0.602518	2.85749	3.08789	0.547431	17.4178
601	M19362	finn-b-IPF	Idiopathic pulmonary fibrosis || id:finn-b-IPF	exposure	MR Egger	22	-1.04291	2.07677	0.621027	-5.11339	3.02757	0.352428	0.00601568	20.647
602	M19362	finn-b-IPF	Idiopathic pulmonary fibrosis || id:finn-b-IPF	exposure	Weighted median	22	0.197567	1.48173	0.893928	-2.70663	3.10177	1.21843	0.0667612	22.2372
603	M19362	finn-b-IPF	Idiopathic pulmonary fibrosis || id:finn-b-IPF	exposure	Inverse variance weighted	22	1.65703	1.03294	0.10867	-0.367521	3.68159	5.24374	0.692449	39.7095
604	M19362	finn-b-IPF	Idiopathic pulmonary fibrosis || id:finn-b-IPF	exposure	Simple mode	22	5.76117	2.74256	0.0479255	0.385742	11.1366	317.719	1.47071	68637.4
605	M19362	finn-b-IPF	Idiopathic pulmonary fibrosis || id:finn-b-IPF	exposure	Weighted mode	22	-0.0990911	2.30427	0.966105	-4.61546	4.41728	0.90566	0.00989765	82.8702
606	M19364	finn-b-IPF	Idiopathic pulmonary fibrosis || id:finn-b-IPF	exposure	MR Egger	19	-3.43185	1.81634	0.076014	-6.99189	0.128187	0.0323271	0.000919312	1.13677
607	M19364	finn-b-IPF	Idiopathic pulmonary fibrosis || id:finn-b-IPF	exposure	Weighted median	19	-0.943982	1.04371	0.365757	-2.98965	1.10169	0.389076	0.0503051	3.00923
608	M19364	finn-b-IPF	Idiopathic pulmonary fibrosis || id:finn-b-IPF	exposure	Inverse variance weighted	19	-0.723228	0.732734	0.32363	-2.15939	0.712932	0.485184	0.115396	2.03996
609	M19364	finn-b-IPF	Idiopathic pulmonary fibrosis || id:finn-b-IPF	exposure	Simple mode	19	-0.750232	1.80265	0.682196	-4.28342	2.78295	0.472257	0.0137954	16.1667
610	M19364	finn-b-IPF	Idiopathic pulmonary fibrosis || id:finn-b-IPF	exposure	Weighted mode	19	-0.750232	1.52094	0.627787	-3.73128	2.23082	0.472257	0.0239622	9.30745
611	M19368	finn-b-IPF	Idiopathic pulmonary fibrosis || id:finn-b-IPF	exposure	MR Egger	12	2.12514	2.5103	0.417033	-2.79504	7.04532	8.37409	0.0611126	1147.48
612	M19368	finn-b-IPF	Idiopathic pulmonary fibrosis || id:finn-b-IPF	exposure	Weighted median	12	1.70662	1.44332	0.237036	-1.12229	4.53553	5.51032	0.325535	93.273
613	M19368	finn-b-IPF	Idiopathic pulmonary fibrosis || id:finn-b-IPF	exposure	Inverse variance weighted	12	0.664085	1.01127	0.511386	-1.31801	2.64618	1.94271	0.267667	14.1001
614	M19368	finn-b-IPF	Idiopathic pulmonary fibrosis || id:finn-b-IPF	exposure	Simple mode	12	-1.97998	2.68163	0.47576	-7.23598	3.27601	0.138072	0.000720203	26.4701
615	M19368	finn-b-IPF	Idiopathic pulmonary fibrosis || id:finn-b-IPF	exposure	Weighted mode	12	2.41069	1.76556	0.199399	-1.0498	5.87118	11.1416	0.350007	354.667
616	M19396	finn-b-IPF	Idiopathic pulmonary fibrosis || id:finn-b-IPF	exposure	MR Egger	7	6.11214	4.9816	0.274461	-3.65179	15.8761	451.302	0.0259446	7.85031e+06
617	M19396	finn-b-IPF	Idiopathic pulmonary fibrosis || id:finn-b-IPF	exposure	Weighted median	7	0.675769	1.30732	0.605219	-1.88659	3.23812	1.96554	0.151589	25.4858
618	M19396	finn-b-IPF	Idiopathic pulmonary fibrosis || id:finn-b-IPF	exposure	Inverse variance weighted	7	-0.255575	1.0038	0.799026	-2.22302	1.71187	0.774471	0.108282	5.53929
619	M19396	finn-b-IPF	Idiopathic pulmonary fibrosis || id:finn-b-IPF	exposure	Simple mode	7	0.900261	1.94727	0.660143	-2.91639	4.71692	2.46025	0.0541285	111.823
620	M19396	finn-b-IPF	Idiopathic pulmonary fibrosis || id:finn-b-IPF	exposure	Weighted mode	7	0.975382	1.91459	0.628628	-2.77721	4.72797	2.65218	0.0622119	113.066
621	M19414	finn-b-IPF	Idiopathic pulmonary fibrosis || id:finn-b-IPF	exposure	MR Egger	13	-1.05559	1.51981	0.50174	-4.03441	1.92323	0.347987	0.0176961	6.84303
622	M19414	finn-b-IPF	Idiopathic pulmonary fibrosis || id:finn-b-IPF	exposure	Weighted median	13	0.115535	1.07443	0.914367	-1.99035	2.22142	1.12247	0.136648	9.22039
623	M19414	finn-b-IPF	Idiopathic pulmonary fibrosis || id:finn-b-IPF	exposure	Inverse variance weighted	13	1.31746	0.786119	0.0937571	-0.223334	2.85825	3.73392	0.799848	17.431
624	M19414	finn-b-IPF	Idiopathic pulmonary fibrosis || id:finn-b-IPF	exposure	Simple mode	13	-0.0584564	1.76245	0.974086	-3.51285	3.39594	0.943219	0.0298117	29.8428
625	M19414	finn-b-IPF	Idiopathic pulmonary fibrosis || id:finn-b-IPF	exposure	Weighted mode	13	-0.195963	1.25152	0.878179	-2.64894	2.25701	0.822042	0.0707262	9.5545
626	M19415	finn-b-IPF	Idiopathic pulmonary fibrosis || id:finn-b-IPF	exposure	MR Egger	6	0.813989	2.96658	0.797375	-5.0005	6.62848	2.25689	0.00673456	756.332
627	M19415	finn-b-IPF	Idiopathic pulmonary fibrosis || id:finn-b-IPF	exposure	Weighted median	6	0.619465	1.33156	0.641775	-1.99039	3.22932	1.85793	0.136643	25.2624
628	M19415	finn-b-IPF	Idiopathic pulmonary fibrosis || id:finn-b-IPF	exposure	Inverse variance weighted	6	0.358871	1.44019	0.803219	-2.46389	3.18163	1.43171	0.085103	24.0861
629	M19415	finn-b-IPF	Idiopathic pulmonary fibrosis || id:finn-b-IPF	exposure	Simple mode	6	0.495722	2.0655	0.819858	-3.55265	4.54409	1.64168	0.0286487	94.075
630	M19415	finn-b-IPF	Idiopathic pulmonary fibrosis || id:finn-b-IPF	exposure	Weighted mode	6	0.685317	1.43681	0.653501	-2.13084	3.50147	1.9844	0.118738	33.1642
631	M19934	finn-b-IPF	Idiopathic pulmonary fibrosis || id:finn-b-IPF	exposure	MR Egger	37	2.39672	1.42324	0.101084	-0.392838	5.18627	10.9871	0.675138	178.801
632	M19934	finn-b-IPF	Idiopathic pulmonary fibrosis || id:finn-b-IPF	exposure	Weighted median	37	0.117167	0.99373	0.906142	-1.83054	2.06488	1.12431	0.160326	7.88434
633	M19934	finn-b-IPF	Idiopathic pulmonary fibrosis || id:finn-b-IPF	exposure	Inverse variance weighted	37	0.042878	0.733138	0.953362	-1.39407	1.47983	1.04381	0.248063	4.39219
634	M19934	finn-b-IPF	Idiopathic pulmonary fibrosis || id:finn-b-IPF	exposure	Simple mode	37	-1.08472	2.04591	0.599235	-5.09471	2.92527	0.337995	0.00612907	18.6392
635	M19934	finn-b-IPF	Idiopathic pulmonary fibrosis || id:finn-b-IPF	exposure	Weighted mode	37	0.510702	1.50073	0.735606	-2.43073	3.45213	1.66646	0.0879729	31.5676
636	M20489	finn-b-IPF	Idiopathic pulmonary fibrosis || id:finn-b-IPF	exposure	MR Egger	36	-2.47316	1.89873	0.201487	-6.19468	1.24835	0.0843176	0.00204027	3.48457
637	M20489	finn-b-IPF	Idiopathic pulmonary fibrosis || id:finn-b-IPF	exposure	Weighted median	36	-1.35853	1.34611	0.312867	-3.99691	1.27985	0.257038	0.0183723	3.5961
638	M20489	finn-b-IPF	Idiopathic pulmonary fibrosis || id:finn-b-IPF	exposure	Inverse variance weighted	36	-1.78992	0.916888	0.0509186	-3.58702	0.00718378	0.166974	0.0276808	1.00721
639	M20489	finn-b-IPF	Idiopathic pulmonary fibrosis || id:finn-b-IPF	exposure	Simple mode	36	-1.1781	2.56268	0.648566	-6.20096	3.84476	0.307865	0.00202749	46.7477
640	M20489	finn-b-IPF	Idiopathic pulmonary fibrosis || id:finn-b-IPF	exposure	Weighted mode	36	-1.1781	1.84434	0.527135	-4.793	2.43681	0.307865	0.00828755	11.4365
641	M20675	finn-b-IPF	Idiopathic pulmonary fibrosis || id:finn-b-IPF	exposure	MR Egger	27	-1.92367	1.65676	0.256566	-5.17093	1.32358	0.146069	0.0056793	3.75684
642	M20675	finn-b-IPF	Idiopathic pulmonary fibrosis || id:finn-b-IPF	exposure	Weighted median	27	-1.5213	0.881747	0.0844684	-3.24953	0.206921	0.218427	0.0387925	1.22989
643	M20675	finn-b-IPF	Idiopathic pulmonary fibrosis || id:finn-b-IPF	exposure	Inverse variance weighted	27	-0.669608	0.669528	0.317253	-1.98188	0.642668	0.511909	0.137809	1.90155
644	M20675	finn-b-IPF	Idiopathic pulmonary fibrosis || id:finn-b-IPF	exposure	Simple mode	27	-2.83614	1.46708	0.0641734	-5.71162	0.0393474	0.0586517	0.00330729	1.04013
645	M20675	finn-b-IPF	Idiopathic pulmonary fibrosis || id:finn-b-IPF	exposure	Weighted mode	27	-1.98465	1.08477	0.0788078	-4.11081	0.141508	0.137429	0.0163946	1.15201
646	M20699	finn-b-IPF	Idiopathic pulmonary fibrosis || id:finn-b-IPF	exposure	MR Egger	23	0.436497	0.782336	0.582785	-1.09688	1.96988	1.54728	0.333911	7.16979
647	M20699	finn-b-IPF	Idiopathic pulmonary fibrosis || id:finn-b-IPF	exposure	Weighted median	23	0.461968	0.721538	0.522007	-0.952246	1.87618	1.58719	0.385873	6.52853
648	M20699	finn-b-IPF	Idiopathic pulmonary fibrosis || id:finn-b-IPF	exposure	Inverse variance weighted	23	0.321321	0.487503	0.509821	-0.634184	1.27683	1.37895	0.530368	3.58524
649	M20699	finn-b-IPF	Idiopathic pulmonary fibrosis || id:finn-b-IPF	exposure	Simple mode	23	0.328999	1.22467	0.790707	-2.07135	2.72935	1.38958	0.126016	15.3229
650	M20699	finn-b-IPF	Idiopathic pulmonary fibrosis || id:finn-b-IPF	exposure	Weighted mode	23	0.415604	0.662652	0.536994	-0.883194	1.7144	1.51529	0.41346	5.55336
651	M21044	finn-b-IPF	Idiopathic pulmonary fibrosis || id:finn-b-IPF	exposure	MR Egger	15	2.84117	2.11928	0.202998	-1.31262	6.99495	17.1358	0.269115	1091.11
652	M21044	finn-b-IPF	Idiopathic pulmonary fibrosis || id:finn-b-IPF	exposure	Weighted median	15	2.33951	1.10753	0.0346544	0.168758	4.51026	10.3762	1.18383	90.9459
653	M21044	finn-b-IPF	Idiopathic pulmonary fibrosis || id:finn-b-IPF	exposure	Inverse variance weighted	15	0.8255	0.930241	0.374861	-0.997772	2.64877	2.28302	0.3687	14.1367
654	M21044	finn-b-IPF	Idiopathic pulmonary fibrosis || id:finn-b-IPF	exposure	Simple mode	15	3.30171	1.98316	0.118148	-0.585275	7.1887	27.1591	0.556953	1324.38
655	M21044	finn-b-IPF	Idiopathic pulmonary fibrosis || id:finn-b-IPF	exposure	Weighted mode	15	3.21317	1.99681	0.129894	-0.700581	7.12692	24.8578	0.496297	1245.04
656	M21047	finn-b-IPF	Idiopathic pulmonary fibrosis || id:finn-b-IPF	exposure	MR Egger	17	0.821571	5.0307	0.872453	-9.03859	10.6817	2.27407	0.000118738	43553
657	M21047	finn-b-IPF	Idiopathic pulmonary fibrosis || id:finn-b-IPF	exposure	Weighted median	17	-0.186648	1.679	0.911485	-3.47748	3.10419	0.829736	0.030885	22.2911
658	M21047	finn-b-IPF	Idiopathic pulmonary fibrosis || id:finn-b-IPF	exposure	Inverse variance weighted	17	0.39146	1.2626	0.756528	-2.08324	2.86616	1.47914	0.124526	17.5694
659	M21047	finn-b-IPF	Idiopathic pulmonary fibrosis || id:finn-b-IPF	exposure	Simple mode	17	0.637407	2.99212	0.833996	-5.22716	6.50197	1.89157	0.00536877	666.454
660	M21047	finn-b-IPF	Idiopathic pulmonary fibrosis || id:finn-b-IPF	exposure	Weighted mode	17	1.03058	2.91965	0.728711	-4.69194	6.75309	2.80269	0.00916891	856.706
661	M21049	finn-b-IPF	Idiopathic pulmonary fibrosis || id:finn-b-IPF	exposure	MR Egger	15	0.323586	0.660309	0.632264	-0.97062	1.61779	1.38207	0.378848	5.04194
662	M21049	finn-b-IPF	Idiopathic pulmonary fibrosis || id:finn-b-IPF	exposure	Weighted median	15	-0.0365248	0.417145	0.930227	-0.854128	0.781079	0.964134	0.425654	2.18383
663	M21049	finn-b-IPF	Idiopathic pulmonary fibrosis || id:finn-b-IPF	exposure	Inverse variance weighted	15	-0.232753	0.321016	0.468421	-0.861944	0.396439	0.792349	0.42234	1.48652
664	M21049	finn-b-IPF	Idiopathic pulmonary fibrosis || id:finn-b-IPF	exposure	Simple mode	15	-1.28159	0.862017	0.159257	-2.97114	0.407964	0.277596	0.0512447	1.50375
665	M21049	finn-b-IPF	Idiopathic pulmonary fibrosis || id:finn-b-IPF	exposure	Weighted mode	15	0.0729044	0.418438	0.864179	-0.747234	0.893042	1.07563	0.473675	2.44255
666	M21127	finn-b-IPF	Idiopathic pulmonary fibrosis || id:finn-b-IPF	exposure	MR Egger	12	-2.67178	2.90843	0.379912	-8.37231	3.02874	0.0691288	0.000231181	20.6713
667	M21127	finn-b-IPF	Idiopathic pulmonary fibrosis || id:finn-b-IPF	exposure	Weighted median	12	-1.48259	1.21479	0.222295	-3.86357	0.898397	0.22705	0.0209929	2.45566
668	M21127	finn-b-IPF	Idiopathic pulmonary fibrosis || id:finn-b-IPF	exposure	Inverse variance weighted	12	-0.616671	0.922507	0.503832	-2.42478	1.19144	0.539738	0.0884972	3.29183
669	M21127	finn-b-IPF	Idiopathic pulmonary fibrosis || id:finn-b-IPF	exposure	Simple mode	12	-1.13787	1.89033	0.559415	-4.84291	2.56718	0.320501	0.00788406	13.029
670	M21127	finn-b-IPF	Idiopathic pulmonary fibrosis || id:finn-b-IPF	exposure	Weighted mode	12	-1.39855	1.38709	0.334991	-4.11725	1.32014	0.246954	0.0162892	3.74395
671	M21151	finn-b-IPF	Idiopathic pulmonary fibrosis || id:finn-b-IPF	exposure	MR Egger	10	-0.309721	0.489219	0.544342	-1.26859	0.649148	0.733652	0.281228	1.91391
672	M21151	finn-b-IPF	Idiopathic pulmonary fibrosis || id:finn-b-IPF	exposure	Weighted median	10	0.211493	0.298394	0.478466	-0.373359	0.796345	1.23552	0.688418	2.21742
673	M21151	finn-b-IPF	Idiopathic pulmonary fibrosis || id:finn-b-IPF	exposure	Inverse variance weighted	10	-0.163736	0.242257	0.499119	-0.638559	0.311088	0.848966	0.528053	1.36491
674	M21151	finn-b-IPF	Idiopathic pulmonary fibrosis || id:finn-b-IPF	exposure	Simple mode	10	0.226352	0.377589	0.563647	-0.513723	0.966427	1.25402	0.598264	2.62854
675	M21151	finn-b-IPF	Idiopathic pulmonary fibrosis || id:finn-b-IPF	exposure	Weighted mode	10	0.205931	0.340618	0.560388	-0.46168	0.873542	1.22867	0.630224	2.39538
676	M21184	finn-b-IPF	Idiopathic pulmonary fibrosis || id:finn-b-IPF	exposure	MR Egger	15	-3.70673	2.15496	0.109116	-7.93045	0.516999	0.0245578	0.000359623	1.67699
677	M21184	finn-b-IPF	Idiopathic pulmonary fibrosis || id:finn-b-IPF	exposure	Weighted median	15	-0.343175	0.651671	0.598466	-1.62045	0.9341	0.709514	0.19781	2.54492
678	M21184	finn-b-IPF	Idiopathic pulmonary fibrosis || id:finn-b-IPF	exposure	Inverse variance weighted	15	-0.0353798	0.487735	0.942173	-0.991341	0.920582	0.965239	0.371079	2.51075
679	M21184	finn-b-IPF	Idiopathic pulmonary fibrosis || id:finn-b-IPF	exposure	Simple mode	15	-0.547109	1.12107	0.633089	-2.74442	1.6502	0.57862	0.0642859	5.20801
680	M21184	finn-b-IPF	Idiopathic pulmonary fibrosis || id:finn-b-IPF	exposure	Weighted mode	15	-0.682828	1.13581	0.557328	-2.90901	1.54336	0.505186	0.0545296	4.68027
681	M21188	finn-b-IPF	Idiopathic pulmonary fibrosis || id:finn-b-IPF	exposure	MR Egger	24	1.33675	1.81725	0.469752	-2.22507	4.89857	3.80666	0.10806	134.098
682	M21188	finn-b-IPF	Idiopathic pulmonary fibrosis || id:finn-b-IPF	exposure	Weighted median	24	0.131516	1.01102	0.896501	-1.85007	2.11311	1.14056	0.157226	8.2739
683	M21188	finn-b-IPF	Idiopathic pulmonary fibrosis || id:finn-b-IPF	exposure	Inverse variance weighted	24	0.0341089	0.68962	0.960552	-1.31755	1.38576	1.0347	0.267792	3.99788
684	M21188	finn-b-IPF	Idiopathic pulmonary fibrosis || id:finn-b-IPF	exposure	Simple mode	24	1.18922	1.7729	0.509041	-2.28565	4.6641	3.28453	0.101708	106.07
685	M21188	finn-b-IPF	Idiopathic pulmonary fibrosis || id:finn-b-IPF	exposure	Weighted mode	24	1.08228	1.31104	0.417561	-1.48736	3.65191	2.9514	0.225969	38.5483
686	M21630	finn-b-IPF	Idiopathic pulmonary fibrosis || id:finn-b-IPF	exposure	MR Egger	22	0.940916	1.00214	0.358981	-1.02328	2.90511	2.56233	0.359413	18.2673
687	M21630	finn-b-IPF	Idiopathic pulmonary fibrosis || id:finn-b-IPF	exposure	Weighted median	22	0.268003	0.894421	0.764453	-1.48506	2.02107	1.30735	0.226488	7.54637
688	M21630	finn-b-IPF	Idiopathic pulmonary fibrosis || id:finn-b-IPF	exposure	Inverse variance weighted	22	0.321392	0.594808	0.58897	-0.844431	1.48722	1.37905	0.429802	4.42476
689	M21630	finn-b-IPF	Idiopathic pulmonary fibrosis || id:finn-b-IPF	exposure	Simple mode	22	0.196203	1.48661	0.896257	-2.71756	3.10997	1.21677	0.0660355	22.4203
690	M21630	finn-b-IPF	Idiopathic pulmonary fibrosis || id:finn-b-IPF	exposure	Weighted mode	22	0.253183	0.855384	0.770147	-1.42337	1.92974	1.28812	0.240901	6.88769
691	M22030	finn-b-IPF	Idiopathic pulmonary fibrosis || id:finn-b-IPF	exposure	MR Egger	19	0.880952	2.34635	0.711965	-3.71789	5.47979	2.4132	0.0242851	239.797
692	M22030	finn-b-IPF	Idiopathic pulmonary fibrosis || id:finn-b-IPF	exposure	Weighted median	19	0.0562081	1.25447	0.964262	-2.40255	2.51497	1.05782	0.0904869	12.3662
693	M22030	finn-b-IPF	Idiopathic pulmonary fibrosis || id:finn-b-IPF	exposure	Inverse variance weighted	19	-0.408095	0.812729	0.615576	-2.00104	1.18485	0.664916	0.135194	3.27021
694	M22030	finn-b-IPF	Idiopathic pulmonary fibrosis || id:finn-b-IPF	exposure	Simple mode	19	2.23223	2.19949	0.323608	-2.07876	6.54323	9.32065	0.125085	694.526
695	M22030	finn-b-IPF	Idiopathic pulmonary fibrosis || id:finn-b-IPF	exposure	Weighted mode	19	0.787356	1.58517	0.625412	-2.31958	3.89429	2.19758	0.0983147	49.1214
696	M22032	finn-b-IPF	Idiopathic pulmonary fibrosis || id:finn-b-IPF	exposure	MR Egger	15	2.92705	1.53076	0.0781462	-0.0732358	5.92734	18.6725	0.929382	375.154
697	M22032	finn-b-IPF	Idiopathic pulmonary fibrosis || id:finn-b-IPF	exposure	Weighted median	15	0.959775	1.03221	0.352462	-1.06336	2.98291	2.61111	0.345295	19.7451
698	M22032	finn-b-IPF	Idiopathic pulmonary fibrosis || id:finn-b-IPF	exposure	Inverse variance weighted	15	0.194912	0.782824	0.803372	-1.33942	1.72925	1.2152	0.261997	5.63641
699	M22032	finn-b-IPF	Idiopathic pulmonary fibrosis || id:finn-b-IPF	exposure	Simple mode	15	0.959727	1.6761	0.575999	-2.32542	4.24488	2.61098	0.0977421	69.7471
700	M22032	finn-b-IPF	Idiopathic pulmonary fibrosis || id:finn-b-IPF	exposure	Weighted mode	15	1.11553	0.9792	0.273726	-0.803699	3.03477	3.0512	0.44767	20.7961
701	M22116	finn-b-IPF	Idiopathic pulmonary fibrosis || id:finn-b-IPF	exposure	MR Egger	14	0.154694	3.56013	0.966056	-6.82317	7.13256	1.1673	0.00108827	1252.07
702	M22116	finn-b-IPF	Idiopathic pulmonary fibrosis || id:finn-b-IPF	exposure	Weighted median	14	-0.559673	1.31927	0.671399	-3.14544	2.02609	0.571396	0.043048	7.5844
703	M22116	finn-b-IPF	Idiopathic pulmonary fibrosis || id:finn-b-IPF	exposure	Inverse variance weighted	14	0.00703684	1.01681	0.994478	-1.98592	1.99999	1.00706	0.137255	7.38899
704	M22116	finn-b-IPF	Idiopathic pulmonary fibrosis || id:finn-b-IPF	exposure	Simple mode	14	-0.63312	2.10717	0.768577	-4.76316	3.49692	0.530933	0.00853855	33.0137
705	M22116	finn-b-IPF	Idiopathic pulmonary fibrosis || id:finn-b-IPF	exposure	Weighted mode	14	-0.602313	2.033	0.771705	-4.58698	3.38236	0.547544	0.0101835	29.4401
706	M22130	finn-b-IPF	Idiopathic pulmonary fibrosis || id:finn-b-IPF	exposure	MR Egger	18	-0.197622	2.43704	0.936375	-4.97422	4.57898	0.82068	0.00691389	97.4149
707	M22130	finn-b-IPF	Idiopathic pulmonary fibrosis || id:finn-b-IPF	exposure	Weighted median	18	0.558428	1.10612	0.613663	-1.60957	2.72643	1.74792	0.199973	15.2782
708	M22130	finn-b-IPF	Idiopathic pulmonary fibrosis || id:finn-b-IPF	exposure	Inverse variance weighted	18	-0.186758	0.893501	0.834434	-1.93802	1.5645	0.829645	0.143989	4.7803
709	M22130	finn-b-IPF	Idiopathic pulmonary fibrosis || id:finn-b-IPF	exposure	Simple mode	18	0.318028	2.05544	0.87886	-3.71063	4.34668	1.37442	0.0244622	77.222
710	M22130	finn-b-IPF	Idiopathic pulmonary fibrosis || id:finn-b-IPF	exposure	Weighted mode	18	0.846997	1.2531	0.508182	-1.60908	3.30307	2.33263	0.200072	27.1961
711	M22138	finn-b-IPF	Idiopathic pulmonary fibrosis || id:finn-b-IPF	exposure	MR Egger	7	-2.69345	2.52438	0.33477	-7.64124	2.25434	0.0676473	0.000480234	9.52902
712	M22138	finn-b-IPF	Idiopathic pulmonary fibrosis || id:finn-b-IPF	exposure	Weighted median	7	-1.29051	1.04148	0.215303	-3.3318	0.750785	0.275131	0.0357287	2.11866
713	M22138	finn-b-IPF	Idiopathic pulmonary fibrosis || id:finn-b-IPF	exposure	Inverse variance weighted	7	-1.19359	0.860442	0.165385	-2.88006	0.492872	0.30313	0.0561313	1.63701
714	M22138	finn-b-IPF	Idiopathic pulmonary fibrosis || id:finn-b-IPF	exposure	Simple mode	7	-3.14923	1.79419	0.129747	-6.66584	0.367376	0.042885	0.00127369	1.44394
715	M22138	finn-b-IPF	Idiopathic pulmonary fibrosis || id:finn-b-IPF	exposure	Weighted mode	7	-2.13219	1.49188	0.202881	-5.05628	0.791907	0.118578	0.00636923	2.2076
716	M22175	finn-b-IPF	Idiopathic pulmonary fibrosis || id:finn-b-IPF	exposure	MR Egger	5	1.73539	2.02892	0.455244	-2.2413	5.71207	5.67111	0.10632	302.497
717	M22175	finn-b-IPF	Idiopathic pulmonary fibrosis || id:finn-b-IPF	exposure	Weighted median	5	1.5506	0.861388	0.0718424	-0.137723	3.23892	4.71429	0.87134	25.5062
718	M22175	finn-b-IPF	Idiopathic pulmonary fibrosis || id:finn-b-IPF	exposure	Inverse variance weighted	5	1.46084	0.704128	0.0380167	0.0807455	2.84093	4.30956	1.08409	17.1316
719	M22175	finn-b-IPF	Idiopathic pulmonary fibrosis || id:finn-b-IPF	exposure	Simple mode	5	2.93838	1.40701	0.105023	0.180631	5.69612	18.8851	1.19797	297.71
720	M22175	finn-b-IPF	Idiopathic pulmonary fibrosis || id:finn-b-IPF	exposure	Weighted mode	5	0.692261	0.990901	0.523277	-1.2499	2.63443	1.99823	0.286532	13.9353
721	M22177	finn-b-IPF	Idiopathic pulmonary fibrosis || id:finn-b-IPF	exposure	MR Egger	48	0.404146	2.11776	0.849494	-3.74667	4.55496	1.49802	0.0235961	95.1034
722	M22177	finn-b-IPF	Idiopathic pulmonary fibrosis || id:finn-b-IPF	exposure	Weighted median	48	-0.557891	1.0073	0.579682	-2.53219	1.41641	0.572415	0.0794844	4.12231
723	M22177	finn-b-IPF	Idiopathic pulmonary fibrosis || id:finn-b-IPF	exposure	Inverse variance weighted	48	0.148027	0.728374	0.838956	-1.27959	1.57564	1.15954	0.278153	4.83383
724	M22177	finn-b-IPF	Idiopathic pulmonary fibrosis || id:finn-b-IPF	exposure	Simple mode	48	0.322198	2.24735	0.886613	-4.08261	4.727	1.38016	0.0168635	112.956
725	M22177	finn-b-IPF	Idiopathic pulmonary fibrosis || id:finn-b-IPF	exposure	Weighted mode	48	-0.386812	1.98933	0.846667	-4.2859	3.51228	0.679218	0.0137612	33.5246
726	M22189	finn-b-IPF	Idiopathic pulmonary fibrosis || id:finn-b-IPF	exposure	MR Egger	9	0.88995	2.36029	0.717307	-3.73622	5.51612	2.43501	0.0238439	248.669
727	M22189	finn-b-IPF	Idiopathic pulmonary fibrosis || id:finn-b-IPF	exposure	Weighted median	9	1.70852	1.17468	0.145822	-0.593862	4.0109	5.52078	0.55219	55.1965
728	M22189	finn-b-IPF	Idiopathic pulmonary fibrosis || id:finn-b-IPF	exposure	Inverse variance weighted	9	0.889469	0.951006	0.349637	-0.974502	2.75344	2.43384	0.37738	15.6965
729	M22189	finn-b-IPF	Idiopathic pulmonary fibrosis || id:finn-b-IPF	exposure	Simple mode	9	1.84491	2.07014	0.398832	-2.21256	5.90238	6.32751	0.10942	365.907
730	M22189	finn-b-IPF	Idiopathic pulmonary fibrosis || id:finn-b-IPF	exposure	Weighted mode	9	2.0056	1.4855	0.21393	-0.905978	4.91718	7.43057	0.404147	136.617
731	M22481	finn-b-IPF	Idiopathic pulmonary fibrosis || id:finn-b-IPF	exposure	MR Egger	32	0.549458	0.697762	0.437191	-0.818156	1.91707	1.73231	0.441245	6.80102
732	M22481	finn-b-IPF	Idiopathic pulmonary fibrosis || id:finn-b-IPF	exposure	Weighted median	32	0.846324	0.757138	0.263655	-0.637665	2.33031	2.33106	0.528525	10.2812
733	M22481	finn-b-IPF	Idiopathic pulmonary fibrosis || id:finn-b-IPF	exposure	Inverse variance weighted	32	0.412806	0.481965	0.391718	-0.531845	1.35746	1.51105	0.58752	3.8863
734	M22481	finn-b-IPF	Idiopathic pulmonary fibrosis || id:finn-b-IPF	exposure	Simple mode	32	0.8998	1.52891	0.560444	-2.09686	3.89646	2.45911	0.122842	49.2279
735	M22481	finn-b-IPF	Idiopathic pulmonary fibrosis || id:finn-b-IPF	exposure	Weighted mode	32	0.78893	0.710053	0.275074	-0.602773	2.18063	2.20104	0.547292	8.85191
736	M22548	finn-b-IPF	Idiopathic pulmonary fibrosis || id:finn-b-IPF	exposure	MR Egger	14	-6.71787	4.5753	0.167745	-15.6855	2.24973	0.00120911	1.54e-07	9.48513
737	M22548	finn-b-IPF	Idiopathic pulmonary fibrosis || id:finn-b-IPF	exposure	Weighted median	14	0.291007	1.46089	0.842108	-2.57234	3.15435	1.33777	0.0763568	23.4378
738	M22548	finn-b-IPF	Idiopathic pulmonary fibrosis || id:finn-b-IPF	exposure	Inverse variance weighted	14	0.576398	1.20664	0.632873	-1.78862	2.94142	1.77962	0.16719	18.9427
739	M22548	finn-b-IPF	Idiopathic pulmonary fibrosis || id:finn-b-IPF	exposure	Simple mode	14	2.05182	2.52515	0.431102	-2.89746	7.0011	7.78205	0.0551629	1097.84
740	M22548	finn-b-IPF	Idiopathic pulmonary fibrosis || id:finn-b-IPF	exposure	Weighted mode	14	-2.00111	2.08392	0.354444	-6.08559	2.08337	0.135185	0.00227543	8.0315
741	M22649	finn-b-IPF	Idiopathic pulmonary fibrosis || id:finn-b-IPF	exposure	MR Egger	13	-3.02508	5.00715	0.557997	-12.8391	6.78894	0.0485538	2.65e-06	887.968
742	M22649	finn-b-IPF	Idiopathic pulmonary fibrosis || id:finn-b-IPF	exposure	Weighted median	13	1.1747	1.90823	0.53816	-2.56543	4.91482	3.23717	0.0768865	136.295
743	M22649	finn-b-IPF	Idiopathic pulmonary fibrosis || id:finn-b-IPF	exposure	Inverse variance weighted	13	0.443828	1.48231	0.764623	-2.4615	3.34916	1.55866	0.0853067	28.4787
744	M22649	finn-b-IPF	Idiopathic pulmonary fibrosis || id:finn-b-IPF	exposure	Simple mode	13	4.57038	4.0469	0.280819	-3.36153	12.5023	96.5812	0.034682	268956
745	M22649	finn-b-IPF	Idiopathic pulmonary fibrosis || id:finn-b-IPF	exposure	Weighted mode	13	-3.92016	3.69436	0.309525	-11.1611	3.32079	0.0198379	1.42e-05	27.6821
746	M22842	finn-b-IPF	Idiopathic pulmonary fibrosis || id:finn-b-IPF	exposure	MR Egger	9	0.26228	0.405454	0.538336	-0.532411	1.05697	1.29989	0.587188	2.87764
747	M22842	finn-b-IPF	Idiopathic pulmonary fibrosis || id:finn-b-IPF	exposure	Weighted median	9	0.157577	0.30087	0.600461	-0.432128	0.747282	1.17067	0.649126	2.11125
748	M22842	finn-b-IPF	Idiopathic pulmonary fibrosis || id:finn-b-IPF	exposure	Inverse variance weighted	9	0.141085	0.217069	0.51572	-0.284369	0.56654	1.15152	0.752489	1.76216
749	M22842	finn-b-IPF	Idiopathic pulmonary fibrosis || id:finn-b-IPF	exposure	Simple mode	9	0.169965	0.430462	0.703277	-0.673741	1.01367	1.18526	0.509798	2.7557
750	M22842	finn-b-IPF	Idiopathic pulmonary fibrosis || id:finn-b-IPF	exposure	Weighted mode	9	0.135335	0.303583	0.667564	-0.459688	0.730358	1.14492	0.631481	2.07582
751	M24074	finn-b-IPF	Idiopathic pulmonary fibrosis || id:finn-b-IPF	exposure	MR Egger	20	-2.08221	1.77285	0.255501	-5.55699	1.39258	0.124655	0.00386037	4.02523
752	M24074	finn-b-IPF	Idiopathic pulmonary fibrosis || id:finn-b-IPF	exposure	Weighted median	20	0.0759601	1.10834	0.94536	-2.09639	2.24831	1.07892	0.122899	9.47173
753	M24074	finn-b-IPF	Idiopathic pulmonary fibrosis || id:finn-b-IPF	exposure	Inverse variance weighted	20	-0.256118	0.755361	0.734559	-1.73663	1.22439	0.774051	0.176114	3.40209
754	M24074	finn-b-IPF	Idiopathic pulmonary fibrosis || id:finn-b-IPF	exposure	Simple mode	20	0.575156	1.8654	0.761187	-3.08103	4.23135	1.77741	0.0459118	68.8097
755	M24074	finn-b-IPF	Idiopathic pulmonary fibrosis || id:finn-b-IPF	exposure	Weighted mode	20	0.369282	1.56096	0.81552	-2.69021	3.42877	1.4467	0.0678669	30.8387
756	M25459	finn-b-IPF	Idiopathic pulmonary fibrosis || id:finn-b-IPF	exposure	MR Egger	29	1.07494	0.750062	0.163299	-0.395185	2.54506	2.92981	0.673556	12.744
757	M25459	finn-b-IPF	Idiopathic pulmonary fibrosis || id:finn-b-IPF	exposure	Weighted median	29	1.49966	0.766996	0.0505546	-0.0036498	3.00297	4.48018	0.996357	20.1454
758	M25459	finn-b-IPF	Idiopathic pulmonary fibrosis || id:finn-b-IPF	exposure	Inverse variance weighted	29	1.27882	0.532951	0.0164169	0.234239	2.32341	3.59241	1.26395	10.2104
759	M25459	finn-b-IPF	Idiopathic pulmonary fibrosis || id:finn-b-IPF	exposure	Simple mode	29	2.46747	1.69106	0.155659	-0.847012	5.78196	11.7926	0.428694	324.395
760	M25459	finn-b-IPF	Idiopathic pulmonary fibrosis || id:finn-b-IPF	exposure	Weighted mode	29	1.18336	0.693357	0.0989435	-0.175616	2.54235	3.26534	0.83894	12.7094
761	M25599	finn-b-IPF	Idiopathic pulmonary fibrosis || id:finn-b-IPF	exposure	MR Egger	21	0.921013	1.64148	0.581297	-2.2963	4.13832	2.51183	0.100631	62.6975
762	M25599	finn-b-IPF	Idiopathic pulmonary fibrosis || id:finn-b-IPF	exposure	Weighted median	21	0.761811	0.941763	0.418561	-1.08405	2.60767	2.14215	0.338225	13.5674
763	M25599	finn-b-IPF	Idiopathic pulmonary fibrosis || id:finn-b-IPF	exposure	Inverse variance weighted	21	1.33619	0.736815	0.0697587	-0.107963	2.78035	3.80454	0.897661	16.1247
764	M25599	finn-b-IPF	Idiopathic pulmonary fibrosis || id:finn-b-IPF	exposure	Simple mode	21	0.382846	1.59574	0.812835	-2.7448	3.51049	1.46645	0.0642614	33.4646
765	M25599	finn-b-IPF	Idiopathic pulmonary fibrosis || id:finn-b-IPF	exposure	Weighted mode	21	0.63583	1.18128	0.596341	-1.67948	2.95114	1.88859	0.186472	19.1277
766	M27256	finn-b-IPF	Idiopathic pulmonary fibrosis || id:finn-b-IPF	exposure	MR Egger	33	1.30183	2.85229	0.651273	-4.28865	6.89231	3.67601	0.0137234	984.675
767	M27256	finn-b-IPF	Idiopathic pulmonary fibrosis || id:finn-b-IPF	exposure	Weighted median	33	0.508802	1.43242	0.722437	-2.29875	3.31635	1.6633	0.100385	27.5596
768	M27256	finn-b-IPF	Idiopathic pulmonary fibrosis || id:finn-b-IPF	exposure	Inverse variance weighted	33	0.168002	0.94417	0.858773	-1.68257	2.01858	1.18294	0.185895	7.5276
769	M27256	finn-b-IPF	Idiopathic pulmonary fibrosis || id:finn-b-IPF	exposure	Simple mode	33	-0.283938	2.67172	0.916027	-5.52051	4.95264	0.752813	0.00400379	141.548
770	M27256	finn-b-IPF	Idiopathic pulmonary fibrosis || id:finn-b-IPF	exposure	Weighted mode	33	0.429572	1.75675	0.808384	-3.01365	3.8728	1.5366	0.049112	48.0766
771	M27273	finn-b-IPF	Idiopathic pulmonary fibrosis || id:finn-b-IPF	exposure	MR Egger	13	-1.33788	2.06959	0.531246	-5.39428	2.71852	0.262401	0.00454247	15.1579
772	M27273	finn-b-IPF	Idiopathic pulmonary fibrosis || id:finn-b-IPF	exposure	Weighted median	13	0.258712	1.38964	0.85231	-2.46498	2.98241	1.29526	0.0850104	19.7352
773	M27273	finn-b-IPF	Idiopathic pulmonary fibrosis || id:finn-b-IPF	exposure	Inverse variance weighted	13	0.94051	0.943185	0.318685	-0.908132	2.78915	2.56129	0.403277	16.2672
774	M27273	finn-b-IPF	Idiopathic pulmonary fibrosis || id:finn-b-IPF	exposure	Simple mode	13	0.443222	2.13257	0.838844	-3.73662	4.62306	1.55772	0.0238345	101.806
775	M27273	finn-b-IPF	Idiopathic pulmonary fibrosis || id:finn-b-IPF	exposure	Weighted mode	13	0.218333	1.51373	0.887709	-2.74858	3.18524	1.244	0.0640188	24.1732
776	M27278	finn-b-IPF	Idiopathic pulmonary fibrosis || id:finn-b-IPF	exposure	MR Egger	21	1.05473	1.9797	0.600369	-2.82549	4.93494	2.87119	0.0592795	139.065
777	M27278	finn-b-IPF	Idiopathic pulmonary fibrosis || id:finn-b-IPF	exposure	Weighted median	21	0.0784891	1.07084	0.94157	-2.02037	2.17734	1.08165	0.132607	8.82284
778	M27278	finn-b-IPF	Idiopathic pulmonary fibrosis || id:finn-b-IPF	exposure	Inverse variance weighted	21	0.0399288	0.853246	0.962676	-1.63243	1.71229	1.04074	0.195453	5.54164
779	M27278	finn-b-IPF	Idiopathic pulmonary fibrosis || id:finn-b-IPF	exposure	Simple mode	21	0.991247	1.7528	0.578008	-2.44423	4.42673	2.69459	0.0867925	83.6572
780	M27278	finn-b-IPF	Idiopathic pulmonary fibrosis || id:finn-b-IPF	exposure	Weighted mode	21	0.160969	1.1819	0.893029	-2.15556	2.4775	1.17465	0.115838	11.9114
781	M27447	finn-b-IPF	Idiopathic pulmonary fibrosis || id:finn-b-IPF	exposure	MR Egger	14	-0.0480476	0.977936	0.961623	-1.9648	1.86871	0.953088	0.140184	6.47991
782	M27447	finn-b-IPF	Idiopathic pulmonary fibrosis || id:finn-b-IPF	exposure	Weighted median	14	-0.222777	0.482488	0.644278	-1.16845	0.7229	0.800293	0.310847	2.0604
783	M27447	finn-b-IPF	Idiopathic pulmonary fibrosis || id:finn-b-IPF	exposure	Inverse variance weighted	14	-0.124919	0.375105	0.739117	-0.860125	0.610288	0.882569	0.423109	1.84096
784	M27447	finn-b-IPF	Idiopathic pulmonary fibrosis || id:finn-b-IPF	exposure	Simple mode	14	-0.641085	0.801454	0.43814	-2.21193	0.929765	0.526721	0.109489	2.53391
785	M27447	finn-b-IPF	Idiopathic pulmonary fibrosis || id:finn-b-IPF	exposure	Weighted mode	14	-0.575018	0.691566	0.420717	-1.93049	0.780451	0.562695	0.145077	2.18246
786	M27513	finn-b-IPF	Idiopathic pulmonary fibrosis || id:finn-b-IPF	exposure	MR Egger	19	-0.284392	0.753356	0.710474	-1.76097	1.19219	0.752472	0.171878	3.29428
787	M27513	finn-b-IPF	Idiopathic pulmonary fibrosis || id:finn-b-IPF	exposure	Weighted median	19	-0.501354	0.746071	0.501589	-1.96365	0.960945	0.60571	0.140345	2.61417
788	M27513	finn-b-IPF	Idiopathic pulmonary fibrosis || id:finn-b-IPF	exposure	Inverse variance weighted	19	-0.316144	0.496923	0.524645	-1.29011	0.657826	0.728955	0.27524	1.93059
789	M27513	finn-b-IPF	Idiopathic pulmonary fibrosis || id:finn-b-IPF	exposure	Simple mode	19	1.01791	1.261	0.430077	-1.45366	3.48948	2.7674	0.233714	32.7688
790	M27513	finn-b-IPF	Idiopathic pulmonary fibrosis || id:finn-b-IPF	exposure	Weighted mode	19	-0.569346	0.74372	0.453873	-2.02704	0.888344	0.565895	0.131725	2.4311
791	M27531	finn-b-IPF	Idiopathic pulmonary fibrosis || id:finn-b-IPF	exposure	MR Egger	16	0.364133	0.43108	0.412481	-0.480784	1.20905	1.43927	0.618298	3.3503
792	M27531	finn-b-IPF	Idiopathic pulmonary fibrosis || id:finn-b-IPF	exposure	Weighted median	16	0.0960248	0.349539	0.783533	-0.589072	0.781121	1.10079	0.554842	2.18392
793	M27531	finn-b-IPF	Idiopathic pulmonary fibrosis || id:finn-b-IPF	exposure	Inverse variance weighted	16	-0.000283953	0.249192	0.999091	-0.488699	0.488132	0.999716	0.613424	1.62927
794	M27531	finn-b-IPF	Idiopathic pulmonary fibrosis || id:finn-b-IPF	exposure	Simple mode	16	-0.336461	0.570037	0.563814	-1.45373	0.780811	0.714293	0.233696	2.18324
795	M27531	finn-b-IPF	Idiopathic pulmonary fibrosis || id:finn-b-IPF	exposure	Weighted mode	16	0.14825	0.480156	0.761756	-0.792856	1.08936	1.1598	0.452551	2.97236
796	M27672	finn-b-IPF	Idiopathic pulmonary fibrosis || id:finn-b-IPF	exposure	MR Egger	5	10.6188	8.29434	0.290476	-5.63815	26.8757	40895.1	0.00355946	469850000000
797	M27672	finn-b-IPF	Idiopathic pulmonary fibrosis || id:finn-b-IPF	exposure	Weighted median	5	0.663299	0.958932	0.489122	-1.21621	2.54281	1.94119	0.296352	12.7153
798	M27672	finn-b-IPF	Idiopathic pulmonary fibrosis || id:finn-b-IPF	exposure	Inverse variance weighted	5	0.551068	0.938351	0.55702	-1.2881	2.39024	1.73511	0.275795	10.9161
799	M27672	finn-b-IPF	Idiopathic pulmonary fibrosis || id:finn-b-IPF	exposure	Simple mode	5	1.06342	1.39675	0.488858	-1.6742	3.80105	2.89627	0.187457	44.7481
800	M27672	finn-b-IPF	Idiopathic pulmonary fibrosis || id:finn-b-IPF	exposure	Weighted mode	5	1.03061	1.22739	0.448346	-1.37507	3.43629	2.80277	0.252821	31.0714
801	M27710	finn-b-IPF	Idiopathic pulmonary fibrosis || id:finn-b-IPF	exposure	MR Egger	14	-0.15965	0.676041	0.817296	-1.48469	1.16539	0.852442	0.226573	3.20717
802	M27710	finn-b-IPF	Idiopathic pulmonary fibrosis || id:finn-b-IPF	exposure	Weighted median	14	-0.173853	0.457771	0.704107	-1.07108	0.723377	0.84042	0.342637	2.06138
803	M27710	finn-b-IPF	Idiopathic pulmonary fibrosis || id:finn-b-IPF	exposure	Inverse variance weighted	14	0.215908	0.352325	0.540003	-0.474649	0.906465	1.24099	0.622103	2.47556
804	M27710	finn-b-IPF	Idiopathic pulmonary fibrosis || id:finn-b-IPF	exposure	Simple mode	14	0.101103	0.895544	0.911838	-1.65416	1.85637	1.10639	0.191252	6.40046
805	M27710	finn-b-IPF	Idiopathic pulmonary fibrosis || id:finn-b-IPF	exposure	Weighted mode	14	-0.2349	0.47356	0.628154	-1.16308	0.693278	0.79065	0.312523	2.00026
806	M27716	finn-b-IPF	Idiopathic pulmonary fibrosis || id:finn-b-IPF	exposure	MR Egger	9	-0.641102	0.395484	0.149037	-1.41625	0.134048	0.526712	0.242622	1.14345
807	M27716	finn-b-IPF	Idiopathic pulmonary fibrosis || id:finn-b-IPF	exposure	Weighted median	9	-0.112054	0.278834	0.687783	-0.658568	0.43446	0.893996	0.517592	1.54413
808	M27716	finn-b-IPF	Idiopathic pulmonary fibrosis || id:finn-b-IPF	exposure	Inverse variance weighted	9	-0.0597073	0.229493	0.794732	-0.509514	0.390099	0.94204	0.600788	1.47713
809	M27716	finn-b-IPF	Idiopathic pulmonary fibrosis || id:finn-b-IPF	exposure	Simple mode	9	0.244998	0.55059	0.668133	-0.834159	1.32415	1.27762	0.434239	3.75901
810	M27716	finn-b-IPF	Idiopathic pulmonary fibrosis || id:finn-b-IPF	exposure	Weighted mode	9	-0.210489	0.270531	0.458924	-0.740729	0.319751	0.810188	0.476766	1.37678
811	M27718	finn-b-IPF	Idiopathic pulmonary fibrosis || id:finn-b-IPF	exposure	MR Egger	8	-2.86881	1.26641	0.0640791	-5.35097	-0.386647	0.0567664	0.00474354	0.679331
812	M27718	finn-b-IPF	Idiopathic pulmonary fibrosis || id:finn-b-IPF	exposure	Weighted median	8	-0.948015	0.741649	0.20116	-2.40165	0.505616	0.387509	0.0905687	1.65801
813	M27718	finn-b-IPF	Idiopathic pulmonary fibrosis || id:finn-b-IPF	exposure	Inverse variance weighted	8	-0.361773	0.644052	0.574312	-1.62412	0.90057	0.696441	0.197086	2.46101
814	M27718	finn-b-IPF	Idiopathic pulmonary fibrosis || id:finn-b-IPF	exposure	Simple mode	8	-0.858277	0.952088	0.397294	-2.72437	1.00781	0.423892	0.0655876	2.73961
815	M27718	finn-b-IPF	Idiopathic pulmonary fibrosis || id:finn-b-IPF	exposure	Weighted mode	8	-0.944178	0.869128	0.313311	-2.64767	0.759313	0.388999	0.0708162	2.13681
816	M27722	finn-b-IPF	Idiopathic pulmonary fibrosis || id:finn-b-IPF	exposure	MR Egger	8	-1.43416	1.83754	0.464777	-5.03573	2.16742	0.238316	0.00650145	8.73568
817	M27722	finn-b-IPF	Idiopathic pulmonary fibrosis || id:finn-b-IPF	exposure	Weighted median	8	0.487404	1.0353	0.637794	-1.54178	2.51659	1.62808	0.214	12.3863
818	M27722	finn-b-IPF	Idiopathic pulmonary fibrosis || id:finn-b-IPF	exposure	Inverse variance weighted	8	0.0507196	0.861891	0.953074	-1.63859	1.74003	1.05203	0.194254	5.69749
819	M27722	finn-b-IPF	Idiopathic pulmonary fibrosis || id:finn-b-IPF	exposure	Simple mode	8	0.446633	1.54638	0.781082	-2.58428	3.47755	1.56304	0.0754504	32.3802
820	M27722	finn-b-IPF	Idiopathic pulmonary fibrosis || id:finn-b-IPF	exposure	Weighted mode	8	0.163204	1.16748	0.892762	-2.12506	2.45147	1.17728	0.119425	11.6054
821	M27728	finn-b-IPF	Idiopathic pulmonary fibrosis || id:finn-b-IPF	exposure	MR Egger	31	1.92791	1.03004	0.0713678	-0.0909628	3.94678	6.8751	0.913052	51.7682
822	M27728	finn-b-IPF	Idiopathic pulmonary fibrosis || id:finn-b-IPF	exposure	Weighted median	31	1.105	0.845433	0.191204	-0.552047	2.76205	3.01923	0.57577	15.8323
823	M27728	finn-b-IPF	Idiopathic pulmonary fibrosis || id:finn-b-IPF	exposure	Inverse variance weighted	31	0.900632	0.597236	0.131555	-0.269951	2.07121	2.46116	0.763417	7.93445
824	M27728	finn-b-IPF	Idiopathic pulmonary fibrosis || id:finn-b-IPF	exposure	Simple mode	31	-0.709719	1.848	0.703653	-4.3318	2.91236	0.491783	0.0131438	18.4002
825	M27728	finn-b-IPF	Idiopathic pulmonary fibrosis || id:finn-b-IPF	exposure	Weighted mode	31	0.789666	0.916908	0.395944	-1.00747	2.58681	2.20266	0.36514	13.2873
826	M27738	finn-b-IPF	Idiopathic pulmonary fibrosis || id:finn-b-IPF	exposure	MR Egger	18	-0.40848	0.494861	0.421257	-1.37841	0.561448	0.66466	0.251979	1.75321
827	M27738	finn-b-IPF	Idiopathic pulmonary fibrosis || id:finn-b-IPF	exposure	Weighted median	18	-0.28602	0.481751	0.552706	-1.23025	0.658212	0.751247	0.292219	1.93134
828	M27738	finn-b-IPF	Idiopathic pulmonary fibrosis || id:finn-b-IPF	exposure	Inverse variance weighted	18	-0.141563	0.343655	0.680387	-0.815127	0.532	0.868	0.442583	1.70233
829	M27738	finn-b-IPF	Idiopathic pulmonary fibrosis || id:finn-b-IPF	exposure	Simple mode	18	-0.363703	0.663873	0.590916	-1.66489	0.937487	0.695098	0.189211	2.55356
830	M27738	finn-b-IPF	Idiopathic pulmonary fibrosis || id:finn-b-IPF	exposure	Weighted mode	18	-0.307269	0.473063	0.524675	-1.23447	0.619934	0.735452	0.290988	1.85881
831	M30805	finn-b-IPF	Idiopathic pulmonary fibrosis || id:finn-b-IPF	exposure	MR Egger	16	0.8445	0.739342	0.272517	-0.60461	2.29361	2.32682	0.546288	9.91066
832	M30805	finn-b-IPF	Idiopathic pulmonary fibrosis || id:finn-b-IPF	exposure	Weighted median	16	1.15166	0.686417	0.0933893	-0.193718	2.49704	3.16344	0.82389	12.1464
833	M30805	finn-b-IPF	Idiopathic pulmonary fibrosis || id:finn-b-IPF	exposure	Inverse variance weighted	16	1.22894	0.513058	0.0166057	0.223346	2.23453	3.4176	1.25025	9.34211
834	M30805	finn-b-IPF	Idiopathic pulmonary fibrosis || id:finn-b-IPF	exposure	Simple mode	16	2.44408	1.45996	0.114834	-0.417434	5.3056	11.52	0.658735	201.461
835	M30805	finn-b-IPF	Idiopathic pulmonary fibrosis || id:finn-b-IPF	exposure	Weighted mode	16	1.18543	0.637033	0.0824801	-0.0631551	2.43401	3.27209	0.938798	11.4046
836	M31453	finn-b-IPF	Idiopathic pulmonary fibrosis || id:finn-b-IPF	exposure	MR Egger	17	-0.0869218	1.27776	0.946663	-2.59133	2.41748	0.916749	0.0749207	11.2176
837	M31453	finn-b-IPF	Idiopathic pulmonary fibrosis || id:finn-b-IPF	exposure	Weighted median	17	-0.0453308	0.950042	0.961944	-1.90741	1.81675	0.955681	0.148464	6.15184
838	M31453	finn-b-IPF	Idiopathic pulmonary fibrosis || id:finn-b-IPF	exposure	Inverse variance weighted	17	-0.349614	0.822289	0.670711	-1.9613	1.26207	0.70496	0.140675	3.53273
839	M31453	finn-b-IPF	Idiopathic pulmonary fibrosis || id:finn-b-IPF	exposure	Simple mode	17	-0.0023439	1.49823	0.998771	-2.93887	2.93418	0.997659	0.0529256	18.8061
840	M31453	finn-b-IPF	Idiopathic pulmonary fibrosis || id:finn-b-IPF	exposure	Weighted mode	17	-0.212482	0.862809	0.808606	-1.90359	1.47862	0.808575	0.149033	4.3869
841	M31522	finn-b-IPF	Idiopathic pulmonary fibrosis || id:finn-b-IPF	exposure	MR Egger	4	1.31948	1.88394	0.556197	-2.37303	5.012	3.74148	0.0931975	150.205
842	M31522	finn-b-IPF	Idiopathic pulmonary fibrosis || id:finn-b-IPF	exposure	Weighted median	4	-0.656322	0.653187	0.314993	-1.93657	0.623924	0.518756	0.144198	1.86624
843	M31522	finn-b-IPF	Idiopathic pulmonary fibrosis || id:finn-b-IPF	exposure	Inverse variance weighted	4	-0.540717	0.614451	0.378858	-1.74504	0.663606	0.58233	0.174638	1.94178
844	M31522	finn-b-IPF	Idiopathic pulmonary fibrosis || id:finn-b-IPF	exposure	Simple mode	4	-1.11108	0.949451	0.326414	-2.972	0.749845	0.329204	0.0512008	2.11667
845	M31522	finn-b-IPF	Idiopathic pulmonary fibrosis || id:finn-b-IPF	exposure	Weighted mode	4	-0.783275	0.83408	0.416963	-2.41807	0.851522	0.456907	0.0890932	2.34321
846	M31536	finn-b-IPF	Idiopathic pulmonary fibrosis || id:finn-b-IPF	exposure	MR Egger	25	-0.100019	0.16457	0.549303	-0.422575	0.222538	0.904821	0.655357	1.24924
847	M31536	finn-b-IPF	Idiopathic pulmonary fibrosis || id:finn-b-IPF	exposure	Weighted median	25	-0.0918818	0.125462	0.463957	-0.337788	0.154024	0.912213	0.713347	1.16652
848	M31536	finn-b-IPF	Idiopathic pulmonary fibrosis || id:finn-b-IPF	exposure	Inverse variance weighted	25	-0.0514943	0.101518	0.611984	-0.25047	0.147481	0.949809	0.778435	1.15891
849	M31536	finn-b-IPF	Idiopathic pulmonary fibrosis || id:finn-b-IPF	exposure	Simple mode	25	-0.351742	0.25417	0.17913	-0.849916	0.146432	0.703462	0.427451	1.1577
850	M31536	finn-b-IPF	Idiopathic pulmonary fibrosis || id:finn-b-IPF	exposure	Weighted mode	25	-0.0960663	0.112453	0.401399	-0.316475	0.124342	0.908404	0.728713	1.1324
851	M31536	finn-b-IPF	Idiopathic pulmonary fibrosis || id:finn-b-IPF	exposure	MR Egger	22	0.454657	0.282968	0.123784	-0.0999599	1.00927	1.57563	0.904874	2.74361
852	M31536	finn-b-IPF	Idiopathic pulmonary fibrosis || id:finn-b-IPF	exposure	Weighted median	22	0.0629494	0.21531	0.770006	-0.359058	0.484957	1.06497	0.698334	1.6241
853	M31536	finn-b-IPF	Idiopathic pulmonary fibrosis || id:finn-b-IPF	exposure	Inverse variance weighted	22	0.0712059	0.1613	0.658888	-0.244942	0.387354	1.0738	0.78275	1.47308
854	M31536	finn-b-IPF	Idiopathic pulmonary fibrosis || id:finn-b-IPF	exposure	Simple mode	22	-0.102244	0.396237	0.798891	-0.878869	0.674382	0.90281	0.415252	1.96282
855	M31536	finn-b-IPF	Idiopathic pulmonary fibrosis || id:finn-b-IPF	exposure	Weighted mode	22	0.149498	0.282486	0.602201	-0.404174	0.70317	1.16125	0.667528	2.02015
856	M31548	finn-b-IPF	Idiopathic pulmonary fibrosis || id:finn-b-IPF	exposure	MR Egger	13	0.0850348	1.2908	0.948657	-2.44492	2.61499	1.08875	0.0867327	13.6671
857	M31548	finn-b-IPF	Idiopathic pulmonary fibrosis || id:finn-b-IPF	exposure	Weighted median	13	0.274206	0.573084	0.632312	-0.849038	1.39745	1.31549	0.427826	4.04487
858	M31548	finn-b-IPF	Idiopathic pulmonary fibrosis || id:finn-b-IPF	exposure	Inverse variance weighted	13	-0.0616604	0.414673	0.881793	-0.87442	0.7511	0.940202	0.417104	2.11933
859	M31548	finn-b-IPF	Idiopathic pulmonary fibrosis || id:finn-b-IPF	exposure	Simple mode	13	0.631646	1.00971	0.54331	-1.34738	2.61068	1.8807	0.25992	13.6082
860	M31548	finn-b-IPF	Idiopathic pulmonary fibrosis || id:finn-b-IPF	exposure	Weighted mode	13	0.713604	0.78244	0.379714	-0.819979	2.24719	2.04134	0.440441	9.46109
861	M31555	finn-b-IPF	Idiopathic pulmonary fibrosis || id:finn-b-IPF	exposure	MR Egger	11	1.87859	0.857108	0.0560879	0.198655	3.55852	6.54425	1.21976	35.1111
862	M31555	finn-b-IPF	Idiopathic pulmonary fibrosis || id:finn-b-IPF	exposure	Weighted median	11	0.957761	0.730125	0.189595	-0.473284	2.38881	2.60586	0.622953	10.9005
863	M31555	finn-b-IPF	Idiopathic pulmonary fibrosis || id:finn-b-IPF	exposure	Inverse variance weighted	11	0.418239	0.63141	0.507722	-0.819326	1.6558	1.51928	0.440729	5.23729
864	M31555	finn-b-IPF	Idiopathic pulmonary fibrosis || id:finn-b-IPF	exposure	Simple mode	11	0.171334	1.49536	0.911048	-2.75958	3.10225	1.18689	0.0633184	22.2479
865	M31555	finn-b-IPF	Idiopathic pulmonary fibrosis || id:finn-b-IPF	exposure	Weighted mode	11	1.0778	0.761068	0.187114	-0.413896	2.56949	2.9382	0.66107	13.0592
866	M31591	finn-b-IPF	Idiopathic pulmonary fibrosis || id:finn-b-IPF	exposure	MR Egger	19	0.114999	0.213963	0.597907	-0.304368	0.534366	1.12187	0.737589	1.70637
867	M31591	finn-b-IPF	Idiopathic pulmonary fibrosis || id:finn-b-IPF	exposure	Weighted median	19	0.0764974	0.182144	0.674497	-0.280504	0.433499	1.0795	0.755403	1.54265
868	M31591	finn-b-IPF	Idiopathic pulmonary fibrosis || id:finn-b-IPF	exposure	Inverse variance weighted	19	0.127622	0.156848	0.415836	-0.1798	0.435044	1.13612	0.835437	1.54503
869	M31591	finn-b-IPF	Idiopathic pulmonary fibrosis || id:finn-b-IPF	exposure	Simple mode	19	0.433062	0.538125	0.43146	-0.621663	1.48779	1.54197	0.537051	4.42728
870	M31591	finn-b-IPF	Idiopathic pulmonary fibrosis || id:finn-b-IPF	exposure	Weighted mode	19	0.099831	0.175146	0.575732	-0.243455	0.443117	1.10498	0.783915	1.55755
871	M31787	finn-b-IPF	Idiopathic pulmonary fibrosis || id:finn-b-IPF	exposure	MR Egger	13	0.846255	0.591643	0.180404	-0.313366	2.00588	2.3309	0.730982	7.4326
872	M31787	finn-b-IPF	Idiopathic pulmonary fibrosis || id:finn-b-IPF	exposure	Weighted median	13	0.148284	0.362343	0.682366	-0.561909	0.858477	1.15984	0.57012	2.35956
873	M31787	finn-b-IPF	Idiopathic pulmonary fibrosis || id:finn-b-IPF	exposure	Inverse variance weighted	13	-0.265205	0.251525	0.291705	-0.758193	0.227784	0.767049	0.468512	1.25581
874	M31787	finn-b-IPF	Idiopathic pulmonary fibrosis || id:finn-b-IPF	exposure	Simple mode	13	0.330624	0.579721	0.578985	-0.805628	1.46688	1.39184	0.446807	4.33567
875	M31787	finn-b-IPF	Idiopathic pulmonary fibrosis || id:finn-b-IPF	exposure	Weighted mode	13	0.213448	0.345417	0.548161	-0.463569	0.890464	1.23794	0.629035	2.43626
876	M32197	finn-b-IPF	Idiopathic pulmonary fibrosis || id:finn-b-IPF	exposure	MR Egger	22	4.26401	1.95985	0.0417424	0.422704	8.10532	71.0948	1.52608	3312.06
877	M32197	finn-b-IPF	Idiopathic pulmonary fibrosis || id:finn-b-IPF	exposure	Weighted median	22	-1.80184	1.14288	0.114892	-4.04188	0.438203	0.164995	0.0175644	1.54992
878	M32197	finn-b-IPF	Idiopathic pulmonary fibrosis || id:finn-b-IPF	exposure	Inverse variance weighted	22	-0.540064	0.916705	0.55577	-2.33681	1.25668	0.582711	0.0966358	3.51373
879	M32197	finn-b-IPF	Idiopathic pulmonary fibrosis || id:finn-b-IPF	exposure	Simple mode	22	-1.7281	1.98783	0.394489	-5.62424	2.16804	0.177622	0.00360931	8.74117
880	M32197	finn-b-IPF	Idiopathic pulmonary fibrosis || id:finn-b-IPF	exposure	Weighted mode	22	-2.04508	1.88669	0.290676	-5.743	1.65284	0.12937	0.00320515	5.22177
881	M32198	finn-b-IPF	Idiopathic pulmonary fibrosis || id:finn-b-IPF	exposure	MR Egger	18	1.37725	1.89445	0.477734	-2.33587	5.09036	3.96397	0.0967265	162.448
882	M32198	finn-b-IPF	Idiopathic pulmonary fibrosis || id:finn-b-IPF	exposure	Weighted median	18	0.922452	1.07783	0.392084	-1.19009	3.03499	2.51545	0.304194	20.8008
883	M32198	finn-b-IPF	Idiopathic pulmonary fibrosis || id:finn-b-IPF	exposure	Inverse variance weighted	18	1.75226	0.72294	0.0153591	0.3353	3.16923	5.76764	1.39836	23.789
884	M32198	finn-b-IPF	Idiopathic pulmonary fibrosis || id:finn-b-IPF	exposure	Simple mode	18	0.920296	1.94999	0.642965	-2.90169	4.74228	2.51003	0.0549302	114.696
885	M32198	finn-b-IPF	Idiopathic pulmonary fibrosis || id:finn-b-IPF	exposure	Weighted mode	18	0.368621	1.64641	0.825508	-2.85834	3.59558	1.44574	0.057364	36.4368
886	M32315	finn-b-IPF	Idiopathic pulmonary fibrosis || id:finn-b-IPF	exposure	MR Egger	31	-0.480938	2.50605	0.849149	-5.39279	4.43091	0.618203	0.00454926	84.0082
887	M32315	finn-b-IPF	Idiopathic pulmonary fibrosis || id:finn-b-IPF	exposure	Weighted median	31	-0.866649	1.2341	0.482521	-3.28548	1.55218	0.420358	0.0374227	4.72176
888	M32315	finn-b-IPF	Idiopathic pulmonary fibrosis || id:finn-b-IPF	exposure	Inverse variance weighted	31	-0.288371	0.892103	0.746507	-2.03689	1.46015	0.749484	0.130433	4.30661
889	M32315	finn-b-IPF	Idiopathic pulmonary fibrosis || id:finn-b-IPF	exposure	Simple mode	31	-1.43546	2.03658	0.486347	-5.42717	2.55624	0.238005	0.00439553	12.8873
890	M32315	finn-b-IPF	Idiopathic pulmonary fibrosis || id:finn-b-IPF	exposure	Weighted mode	31	-0.792353	1.4185	0.580592	-3.57262	1.98792	0.452778	0.0280821	7.3003
891	M32319	finn-b-IPF	Idiopathic pulmonary fibrosis || id:finn-b-IPF	exposure	MR Egger	6	-0.771456	1.63039	0.660756	-3.96703	2.42412	0.462339	0.0189296	11.2922
892	M32319	finn-b-IPF	Idiopathic pulmonary fibrosis || id:finn-b-IPF	exposure	Weighted median	6	0.19987	1.05018	0.849058	-1.85848	2.25822	1.22124	0.15591	9.566
893	M32319	finn-b-IPF	Idiopathic pulmonary fibrosis || id:finn-b-IPF	exposure	Inverse variance weighted	6	0.342304	0.781431	0.661352	-1.1893	1.87391	1.40819	0.304434	6.5137
894	M32319	finn-b-IPF	Idiopathic pulmonary fibrosis || id:finn-b-IPF	exposure	Simple mode	6	-0.428026	1.41003	0.773691	-3.19169	2.33564	0.651795	0.0411022	10.3361
895	M32319	finn-b-IPF	Idiopathic pulmonary fibrosis || id:finn-b-IPF	exposure	Weighted mode	6	0.0210036	1.2791	0.987534	-2.48603	2.52804	1.02123	0.0832396	12.5289
896	M32322	finn-b-IPF	Idiopathic pulmonary fibrosis || id:finn-b-IPF	exposure	Inverse variance weighted	2	3.12051	4.23012	0.460703	-5.17052	11.4115	22.658	0.0056816	90359.3
897	M32328	finn-b-IPF	Idiopathic pulmonary fibrosis || id:finn-b-IPF	exposure	MR Egger	16	0.770311	1.22024	0.538029	-1.62136	3.16198	2.16044	0.197631	23.6173
898	M32328	finn-b-IPF	Idiopathic pulmonary fibrosis || id:finn-b-IPF	exposure	Weighted median	16	0.0330014	0.622892	0.957747	-1.18787	1.25387	1.03355	0.304871	3.50388
899	M32328	finn-b-IPF	Idiopathic pulmonary fibrosis || id:finn-b-IPF	exposure	Inverse variance weighted	16	-0.297523	0.630462	0.636989	-1.53323	0.938182	0.742655	0.215838	2.55533
900	M32328	finn-b-IPF	Idiopathic pulmonary fibrosis || id:finn-b-IPF	exposure	Simple mode	16	1.49548	1.23917	0.246183	-0.933296	3.92425	4.46146	0.393256	50.6151
901	M32328	finn-b-IPF	Idiopathic pulmonary fibrosis || id:finn-b-IPF	exposure	Weighted mode	16	0.19354	0.648069	0.769311	-1.07668	1.46376	1.21354	0.340726	4.32216
902	M32338	finn-b-IPF	Idiopathic pulmonary fibrosis || id:finn-b-IPF	exposure	MR Egger	25	-0.0931773	0.771845	0.904961	-1.60599	1.41964	0.911032	0.20069	4.13563
903	M32338	finn-b-IPF	Idiopathic pulmonary fibrosis || id:finn-b-IPF	exposure	Weighted median	25	-0.260504	0.623348	0.676012	-1.48227	0.961257	0.770663	0.227122	2.61498
904	M32338	finn-b-IPF	Idiopathic pulmonary fibrosis || id:finn-b-IPF	exposure	Inverse variance weighted	25	0.0163468	0.485789	0.973156	-0.935799	0.968493	1.01648	0.392272	2.63397
905	M32338	finn-b-IPF	Idiopathic pulmonary fibrosis || id:finn-b-IPF	exposure	Simple mode	25	-0.0376028	1.22335	0.975733	-2.43536	2.36015	0.963095	0.0875663	10.5926
906	M32338	finn-b-IPF	Idiopathic pulmonary fibrosis || id:finn-b-IPF	exposure	Weighted mode	25	-0.246587	0.673338	0.717413	-1.56633	1.07316	0.781463	0.20881	2.92459
907	M32339	finn-b-IPF	Idiopathic pulmonary fibrosis || id:finn-b-IPF	exposure	MR Egger	37	-0.522831	3.13672	0.868581	-6.67081	5.62515	0.59284	0.00126737	277.314
908	M32339	finn-b-IPF	Idiopathic pulmonary fibrosis || id:finn-b-IPF	exposure	Weighted median	37	-0.315751	1.17506	0.788152	-2.61887	1.98737	0.729241	0.0728853	7.29629
909	M32339	finn-b-IPF	Idiopathic pulmonary fibrosis || id:finn-b-IPF	exposure	Inverse variance weighted	37	-0.235125	0.837496	0.778904	-1.87662	1.40637	0.790472	0.153107	4.0811
910	M32339	finn-b-IPF	Idiopathic pulmonary fibrosis || id:finn-b-IPF	exposure	Simple mode	37	-1.03283	2.22825	0.645785	-5.4002	3.33454	0.355999	0.00451569	28.0655
911	M32339	finn-b-IPF	Idiopathic pulmonary fibrosis || id:finn-b-IPF	exposure	Weighted mode	37	-0.60974	1.85334	0.744066	-4.24229	3.02281	0.543492	0.0143746	20.549
912	M32346	finn-b-IPF	Idiopathic pulmonary fibrosis || id:finn-b-IPF	exposure	MR Egger	14	0.0998859	0.558974	0.861158	-0.995703	1.19547	1.10504	0.369464	3.30513
913	M32346	finn-b-IPF	Idiopathic pulmonary fibrosis || id:finn-b-IPF	exposure	Weighted median	14	-0.0388641	0.363358	0.914822	-0.751046	0.673318	0.961881	0.471873	1.96073
914	M32346	finn-b-IPF	Idiopathic pulmonary fibrosis || id:finn-b-IPF	exposure	Inverse variance weighted	14	0.225833	0.266931	0.397533	-0.297352	0.749018	1.25337	0.742783	2.11492
915	M32346	finn-b-IPF	Idiopathic pulmonary fibrosis || id:finn-b-IPF	exposure	Simple mode	14	-0.081326	0.566428	0.888036	-1.19153	1.02887	0.921893	0.303758	2.79791
916	M32346	finn-b-IPF	Idiopathic pulmonary fibrosis || id:finn-b-IPF	exposure	Weighted mode	14	0.00568379	0.41106	0.989178	-0.799993	0.811361	1.0057	0.449332	2.25097
917	M32348	finn-b-IPF	Idiopathic pulmonary fibrosis || id:finn-b-IPF	exposure	MR Egger	40	-1.40432	2.39318	0.560807	-6.09495	3.28631	0.245533	0.00225421	26.7439
918	M32348	finn-b-IPF	Idiopathic pulmonary fibrosis || id:finn-b-IPF	exposure	Weighted median	40	-1.48058	1.1302	0.190188	-3.69577	0.7346	0.227505	0.0248284	2.08465
919	M32348	finn-b-IPF	Idiopathic pulmonary fibrosis || id:finn-b-IPF	exposure	Inverse variance weighted	40	-1.8639	0.778626	0.0166736	-3.39	-0.337789	0.155067	0.0337086	0.713346
920	M32348	finn-b-IPF	Idiopathic pulmonary fibrosis || id:finn-b-IPF	exposure	Simple mode	40	-5.09902	2.48482	0.0469189	-9.96927	-0.228773	0.00610271	4.68e-05	0.795509
921	M32348	finn-b-IPF	Idiopathic pulmonary fibrosis || id:finn-b-IPF	exposure	Weighted mode	40	-1.46207	1.96286	0.460819	-5.30927	2.38514	0.231757	0.00494551	10.8606
922	M32379	finn-b-IPF	Idiopathic pulmonary fibrosis || id:finn-b-IPF	exposure	MR Egger	11	-1.00475	1.44923	0.505616	-3.84524	1.83573	0.366135	0.0213814	6.26971
923	M32379	finn-b-IPF	Idiopathic pulmonary fibrosis || id:finn-b-IPF	exposure	Weighted median	11	-0.872858	0.82131	0.287889	-2.48263	0.73691	0.417756	0.0835236	2.08947
924	M32379	finn-b-IPF	Idiopathic pulmonary fibrosis || id:finn-b-IPF	exposure	Inverse variance weighted	11	-0.404295	0.616958	0.512272	-1.61353	0.804943	0.667447	0.199183	2.23657
925	M32379	finn-b-IPF	Idiopathic pulmonary fibrosis || id:finn-b-IPF	exposure	Simple mode	11	0.902177	1.54217	0.571508	-2.12048	3.92483	2.46496	0.119974	50.6446
926	M32379	finn-b-IPF	Idiopathic pulmonary fibrosis || id:finn-b-IPF	exposure	Weighted mode	11	-1.67868	1.17004	0.181893	-3.97197	0.614602	0.18662	0.0188363	1.84892
927	M32388	finn-b-IPF	Idiopathic pulmonary fibrosis || id:finn-b-IPF	exposure	MR Egger	7	-3.8346	2.43147	0.175605	-8.60027	0.931073	0.02161	0.000184056	2.53723
928	M32388	finn-b-IPF	Idiopathic pulmonary fibrosis || id:finn-b-IPF	exposure	Weighted median	7	-0.671439	0.82896	0.417953	-2.2962	0.953322	0.510973	0.100641	2.59431
929	M32388	finn-b-IPF	Idiopathic pulmonary fibrosis || id:finn-b-IPF	exposure	Inverse variance weighted	7	-0.145226	0.640938	0.820748	-1.40146	1.11101	0.864827	0.246236	3.03743
930	M32388	finn-b-IPF	Idiopathic pulmonary fibrosis || id:finn-b-IPF	exposure	Simple mode	7	-0.569728	0.942866	0.567806	-2.41774	1.27829	0.565679	0.0891224	3.59049
931	M32388	finn-b-IPF	Idiopathic pulmonary fibrosis || id:finn-b-IPF	exposure	Weighted mode	7	-0.635262	0.79828	0.456476	-2.19989	0.929367	0.529797	0.110815	2.53291
932	M32393	finn-b-IPF	Idiopathic pulmonary fibrosis || id:finn-b-IPF	exposure	MR Egger	15	4.41506	4.10535	0.301733	-3.63143	12.4616	82.687	0.0264782	258217
933	M32393	finn-b-IPF	Idiopathic pulmonary fibrosis || id:finn-b-IPF	exposure	Weighted median	15	-1.02099	1.46276	0.485187	-3.888	1.84603	0.360239	0.0204862	6.33463
934	M32393	finn-b-IPF	Idiopathic pulmonary fibrosis || id:finn-b-IPF	exposure	Inverse variance weighted	15	-1.41	1.01685	0.165554	-3.40303	0.583032	0.244144	0.0332724	1.79146
935	M32393	finn-b-IPF	Idiopathic pulmonary fibrosis || id:finn-b-IPF	exposure	Simple mode	15	-2.06031	2.62132	0.444978	-7.1981	3.07747	0.127414	0.000748008	21.7035
936	M32393	finn-b-IPF	Idiopathic pulmonary fibrosis || id:finn-b-IPF	exposure	Weighted mode	15	-0.8995	1.94581	0.650985	-4.71328	2.91428	0.406773	0.00897529	18.4355
937	M32405	finn-b-IPF	Idiopathic pulmonary fibrosis || id:finn-b-IPF	exposure	MR Egger	16	-1.48279	0.901363	0.122216	-3.24946	0.28388	0.227003	0.038795	1.32827
938	M32405	finn-b-IPF	Idiopathic pulmonary fibrosis || id:finn-b-IPF	exposure	Weighted median	16	-0.72267	0.60934	0.235626	-1.91698	0.471635	0.485454	0.147051	1.60261
939	M32405	finn-b-IPF	Idiopathic pulmonary fibrosis || id:finn-b-IPF	exposure	Inverse variance weighted	16	-0.0454518	0.479992	0.924559	-0.986236	0.895332	0.955566	0.372978	2.44815
940	M32405	finn-b-IPF	Idiopathic pulmonary fibrosis || id:finn-b-IPF	exposure	Simple mode	16	-0.70301	0.975532	0.48221	-2.61505	1.20903	0.495093	0.073164	3.35024
941	M32405	finn-b-IPF	Idiopathic pulmonary fibrosis || id:finn-b-IPF	exposure	Weighted mode	16	-0.864334	0.625422	0.187207	-2.09016	0.361493	0.421332	0.123667	1.43547
942	M32412	finn-b-IPF	Idiopathic pulmonary fibrosis || id:finn-b-IPF	exposure	MR Egger	24	0.144958	0.364029	0.694317	-0.568539	0.858455	1.15599	0.566352	2.35951
943	M32412	finn-b-IPF	Idiopathic pulmonary fibrosis || id:finn-b-IPF	exposure	Weighted median	24	0.151679	0.321097	0.636657	-0.47767	0.781028	1.16379	0.620227	2.18372
944	M32412	finn-b-IPF	Idiopathic pulmonary fibrosis || id:finn-b-IPF	exposure	Inverse variance weighted	24	0.287487	0.246785	0.244048	-0.196212	0.771185	1.33307	0.821838	2.16233
945	M32412	finn-b-IPF	Idiopathic pulmonary fibrosis || id:finn-b-IPF	exposure	Simple mode	24	-0.00632744	0.707792	0.992944	-1.3936	1.38095	0.993693	0.24818	3.97866
946	M32412	finn-b-IPF	Idiopathic pulmonary fibrosis || id:finn-b-IPF	exposure	Weighted mode	24	0.126598	0.320185	0.696198	-0.500964	0.754161	1.13496	0.605946	2.12583
947	M32418	finn-b-IPF	Idiopathic pulmonary fibrosis || id:finn-b-IPF	exposure	MR Egger	14	-0.774834	0.949618	0.430432	-2.63609	1.08642	0.46078	0.0716412	2.96364
948	M32418	finn-b-IPF	Idiopathic pulmonary fibrosis || id:finn-b-IPF	exposure	Weighted median	14	-0.299324	0.71597	0.675898	-1.70263	1.10398	0.741319	0.182204	3.01614
949	M32418	finn-b-IPF	Idiopathic pulmonary fibrosis || id:finn-b-IPF	exposure	Inverse variance weighted	14	-0.131327	0.505452	0.795001	-1.12201	0.859358	0.876931	0.325624	2.36164
950	M32418	finn-b-IPF	Idiopathic pulmonary fibrosis || id:finn-b-IPF	exposure	Simple mode	14	-1.50715	1.25786	0.252233	-3.97255	0.958253	0.221541	0.0188254	2.60714
951	M32418	finn-b-IPF	Idiopathic pulmonary fibrosis || id:finn-b-IPF	exposure	Weighted mode	14	-0.418497	0.704714	0.562802	-1.79974	0.962743	0.658035	0.165342	2.61887
952	M32425	finn-b-IPF	Idiopathic pulmonary fibrosis || id:finn-b-IPF	exposure	MR Egger	19	0.617528	1.16985	0.604413	-1.67538	2.91044	1.85434	0.187237	18.3648
953	M32425	finn-b-IPF	Idiopathic pulmonary fibrosis || id:finn-b-IPF	exposure	Weighted median	19	-0.325619	0.554378	0.556962	-1.4122	0.760961	0.72208	0.243607	2.14033
954	M32425	finn-b-IPF	Idiopathic pulmonary fibrosis || id:finn-b-IPF	exposure	Inverse variance weighted	19	-0.0689271	0.406117	0.865228	-0.864916	0.727062	0.933395	0.421087	2.06899
955	M32425	finn-b-IPF	Idiopathic pulmonary fibrosis || id:finn-b-IPF	exposure	Simple mode	19	-0.555563	0.951212	0.56643	-2.41994	1.30881	0.573749	0.0889271	3.70178
956	M32425	finn-b-IPF	Idiopathic pulmonary fibrosis || id:finn-b-IPF	exposure	Weighted mode	19	-0.307697	0.837737	0.717681	-1.94966	1.33427	0.735138	0.142322	3.79721
957	M32445	finn-b-IPF	Idiopathic pulmonary fibrosis || id:finn-b-IPF	exposure	MR Egger	13	1.21393	1.22945	0.344682	-1.1958	3.62366	3.36668	0.302461	37.4744
958	M32445	finn-b-IPF	Idiopathic pulmonary fibrosis || id:finn-b-IPF	exposure	Weighted median	13	-0.397913	0.618756	0.520168	-1.61067	0.814848	0.67172	0.199753	2.25883
959	M32445	finn-b-IPF	Idiopathic pulmonary fibrosis || id:finn-b-IPF	exposure	Inverse variance weighted	13	0.00787397	0.453586	0.98615	-0.881154	0.896902	1.00791	0.414305	2.45199
960	M32445	finn-b-IPF	Idiopathic pulmonary fibrosis || id:finn-b-IPF	exposure	Simple mode	13	-1.13278	1.15718	0.346945	-3.40086	1.13529	0.322136	0.0333447	3.11208
961	M32445	finn-b-IPF	Idiopathic pulmonary fibrosis || id:finn-b-IPF	exposure	Weighted mode	13	-0.788261	0.984521	0.438896	-2.71792	1.1414	0.454635	0.0660118	3.13115
962	M32452	finn-b-IPF	Idiopathic pulmonary fibrosis || id:finn-b-IPF	exposure	MR Egger	30	-0.0709051	1.48756	0.962321	-2.98652	2.84471	0.93155	0.0504628	17.1965
963	M32452	finn-b-IPF	Idiopathic pulmonary fibrosis || id:finn-b-IPF	exposure	Weighted median	30	-0.195377	0.981077	0.842149	-2.11829	1.72753	0.822525	0.120237	5.62676
964	M32452	finn-b-IPF	Idiopathic pulmonary fibrosis || id:finn-b-IPF	exposure	Inverse variance weighted	30	-0.326646	0.680222	0.631082	-1.65988	1.00659	0.721339	0.190162	2.73625
965	M32452	finn-b-IPF	Idiopathic pulmonary fibrosis || id:finn-b-IPF	exposure	Simple mode	30	-0.353359	1.51407	0.817103	-3.32094	2.61422	0.702325	0.0361189	13.6566
966	M32452	finn-b-IPF	Idiopathic pulmonary fibrosis || id:finn-b-IPF	exposure	Weighted mode	30	-0.687261	1.30267	0.601806	-3.2405	1.86597	0.502952	0.0391445	6.46223
967	M32489	finn-b-IPF	Idiopathic pulmonary fibrosis || id:finn-b-IPF	exposure	MR Egger	32	5.73757	2.68925	0.0411759	0.46664	11.0085	310.309	1.59463	60384.9
968	M32489	finn-b-IPF	Idiopathic pulmonary fibrosis || id:finn-b-IPF	exposure	Weighted median	32	2.3343	1.37453	0.0894597	-0.359777	5.02838	10.3222	0.697832	152.685
969	M32489	finn-b-IPF	Idiopathic pulmonary fibrosis || id:finn-b-IPF	exposure	Inverse variance weighted	32	1.10179	0.878146	0.209595	-0.619375	2.82296	3.00955	0.538281	16.8265
970	M32489	finn-b-IPF	Idiopathic pulmonary fibrosis || id:finn-b-IPF	exposure	Simple mode	32	0.858324	2.71868	0.754336	-4.47028	6.18693	2.3592	0.0114441	486.351
971	M32489	finn-b-IPF	Idiopathic pulmonary fibrosis || id:finn-b-IPF	exposure	Weighted mode	32	2.79451	1.59336	0.089339	-0.328467	5.91749	16.3547	0.720027	371.479
972	M32492	finn-b-IPF	Idiopathic pulmonary fibrosis || id:finn-b-IPF	exposure	MR Egger	43	-0.670056	1.10597	0.547951	-2.83776	1.49764	0.51168	0.0585569	4.47114
973	M32492	finn-b-IPF	Idiopathic pulmonary fibrosis || id:finn-b-IPF	exposure	Weighted median	43	0.120624	1.05891	0.909307	-1.95484	2.19609	1.1282	0.141587	8.9898
974	M32492	finn-b-IPF	Idiopathic pulmonary fibrosis || id:finn-b-IPF	exposure	Inverse variance weighted	43	-0.184145	0.61043	0.762908	-1.38059	1.0123	0.831815	0.251431	2.75192
975	M32492	finn-b-IPF	Idiopathic pulmonary fibrosis || id:finn-b-IPF	exposure	Simple mode	43	-3.75849	2.3319	0.114502	-8.32901	0.812034	0.023319	0.000241411	2.25249
976	M32492	finn-b-IPF	Idiopathic pulmonary fibrosis || id:finn-b-IPF	exposure	Weighted mode	43	0.248454	1.05623	0.815175	-1.82176	2.31867	1.28204	0.161741	10.1621
977	M32497	finn-b-IPF	Idiopathic pulmonary fibrosis || id:finn-b-IPF	exposure	MR Egger	22	-0.383303	0.477866	0.431915	-1.31992	0.553314	0.681606	0.267156	1.73901
978	M32497	finn-b-IPF	Idiopathic pulmonary fibrosis || id:finn-b-IPF	exposure	Weighted median	22	-0.147339	0.468894	0.753349	-1.06637	0.771693	0.863001	0.344255	2.16343
979	M32497	finn-b-IPF	Idiopathic pulmonary fibrosis || id:finn-b-IPF	exposure	Inverse variance weighted	22	-0.269128	0.347922	0.43921	-0.951056	0.4128	0.764046	0.386333	1.51104
980	M32497	finn-b-IPF	Idiopathic pulmonary fibrosis || id:finn-b-IPF	exposure	Simple mode	22	0.0734339	1.06313	0.945585	-2.0103	2.15717	1.0762	0.133948	8.64664
981	M32497	finn-b-IPF	Idiopathic pulmonary fibrosis || id:finn-b-IPF	exposure	Weighted mode	22	-0.16728	0.417974	0.693039	-0.986509	0.651949	0.845963	0.372876	1.91928
982	M32504	finn-b-IPF	Idiopathic pulmonary fibrosis || id:finn-b-IPF	exposure	MR Egger	10	-0.902023	1.9169	0.650514	-4.65914	2.85509	0.405748	0.00947463	17.376
983	M32504	finn-b-IPF	Idiopathic pulmonary fibrosis || id:finn-b-IPF	exposure	Weighted median	10	-2.08013	0.960235	0.0302907	-3.96219	-0.198066	0.124914	0.0190214	0.820316
984	M32504	finn-b-IPF	Idiopathic pulmonary fibrosis || id:finn-b-IPF	exposure	Inverse variance weighted	10	-1.54116	0.693178	0.0261936	-2.89979	-0.182534	0.214132	0.0550347	0.833156
985	M32504	finn-b-IPF	Idiopathic pulmonary fibrosis || id:finn-b-IPF	exposure	Simple mode	10	-2.10741	1.57364	0.213342	-5.19174	0.976913	0.121552	0.00556232	2.65624
986	M32504	finn-b-IPF	Idiopathic pulmonary fibrosis || id:finn-b-IPF	exposure	Weighted mode	10	-2.33105	1.63461	0.187602	-5.53488	0.872782	0.0971937	0.00394668	2.39356
987	M32518	finn-b-IPF	Idiopathic pulmonary fibrosis || id:finn-b-IPF	exposure	MR Egger	37	-0.321416	3.44856	0.926274	-7.0806	6.43777	0.725122	0.000841266	625.012
988	M32518	finn-b-IPF	Idiopathic pulmonary fibrosis || id:finn-b-IPF	exposure	Weighted median	37	-1.19781	1.33286	0.368824	-3.81022	1.4146	0.301854	0.0221433	4.11482
989	M32518	finn-b-IPF	Idiopathic pulmonary fibrosis || id:finn-b-IPF	exposure	Inverse variance weighted	37	-0.268991	0.944062	0.775699	-2.11935	1.58137	0.76415	0.120109	4.86162
990	M32518	finn-b-IPF	Idiopathic pulmonary fibrosis || id:finn-b-IPF	exposure	Simple mode	37	-3.11663	3.06509	0.316026	-9.1242	2.89094	0.0443062	0.000108996	18.0102
991	M32518	finn-b-IPF	Idiopathic pulmonary fibrosis || id:finn-b-IPF	exposure	Weighted mode	37	-3.11663	2.79204	0.271708	-8.58902	2.35576	0.0443062	0.000186138	10.5461
992	M32549	finn-b-IPF	Idiopathic pulmonary fibrosis || id:finn-b-IPF	exposure	MR Egger	8	-0.829695	2.35738	0.736903	-5.45016	3.79078	0.436182	0.0042956	44.2907
993	M32549	finn-b-IPF	Idiopathic pulmonary fibrosis || id:finn-b-IPF	exposure	Weighted median	8	-0.378277	0.647792	0.559255	-1.64795	0.891396	0.685041	0.192444	2.43853
994	M32549	finn-b-IPF	Idiopathic pulmonary fibrosis || id:finn-b-IPF	exposure	Inverse variance weighted	8	0.214148	0.640439	0.738095	-1.04111	1.46941	1.23881	0.353061	4.34667
995	M32549	finn-b-IPF	Idiopathic pulmonary fibrosis || id:finn-b-IPF	exposure	Simple mode	8	-0.567356	0.965129	0.575095	-2.45901	1.3243	0.567023	0.0855197	3.75954
996	M32549	finn-b-IPF	Idiopathic pulmonary fibrosis || id:finn-b-IPF	exposure	Weighted mode	8	-0.515669	0.99263	0.619431	-2.46122	1.42989	0.597101	0.0853304	4.17822
997	M32553	finn-b-IPF	Idiopathic pulmonary fibrosis || id:finn-b-IPF	exposure	MR Egger	13	0.378575	1.44482	0.798146	-2.45327	3.21042	1.4602	0.0860115	24.7896
998	M32553	finn-b-IPF	Idiopathic pulmonary fibrosis || id:finn-b-IPF	exposure	Weighted median	13	-0.566184	0.685237	0.408656	-1.90925	0.776881	0.567687	0.148192	2.17468
999	M32553	finn-b-IPF	Idiopathic pulmonary fibrosis || id:finn-b-IPF	exposure	Inverse variance weighted	13	-0.0988387	0.501874	0.843875	-1.08251	0.884834	0.905889	0.338744	2.42258
1000	M32553	finn-b-IPF	Idiopathic pulmonary fibrosis || id:finn-b-IPF	exposure	Simple mode	13	-1.25616	1.35784	0.373136	-3.91754	1.40521	0.284745	0.01989	4.07638
1001	M32553	finn-b-IPF	Idiopathic pulmonary fibrosis || id:finn-b-IPF	exposure	Weighted mode	13	-0.926849	1.11508	0.422094	-3.1124	1.2587	0.395799	0.044494	3.52085
1002	M32557	finn-b-IPF	Idiopathic pulmonary fibrosis || id:finn-b-IPF	exposure	MR Egger	14	1.18358	1.68409	0.495589	-2.11724	4.4844	3.26605	0.120363	88.6239
1003	M32557	finn-b-IPF	Idiopathic pulmonary fibrosis || id:finn-b-IPF	exposure	Weighted median	14	0.180513	0.597027	0.762383	-0.98966	1.35068	1.19783	0.371703	3.86007
1004	M32557	finn-b-IPF	Idiopathic pulmonary fibrosis || id:finn-b-IPF	exposure	Inverse variance weighted	14	-0.0305008	0.436886	0.944342	-0.886797	0.825795	0.96996	0.411973	2.2837
1005	M32557	finn-b-IPF	Idiopathic pulmonary fibrosis || id:finn-b-IPF	exposure	Simple mode	14	0.154689	0.935163	0.871163	-1.67823	1.98761	1.16729	0.186704	7.29805
1006	M32557	finn-b-IPF	Idiopathic pulmonary fibrosis || id:finn-b-IPF	exposure	Weighted mode	14	0.174948	0.849974	0.840114	-1.491	1.8409	1.19118	0.225147	6.30219
1007	M32560	finn-b-IPF	Idiopathic pulmonary fibrosis || id:finn-b-IPF	exposure	MR Egger	13	0.253128	0.474684	0.604464	-0.677252	1.18351	1.28805	0.508011	3.26581
1008	M32560	finn-b-IPF	Idiopathic pulmonary fibrosis || id:finn-b-IPF	exposure	Weighted median	13	0.58253	0.364479	0.109987	-0.131849	1.29691	1.79056	0.876473	3.65797
1009	M32560	finn-b-IPF	Idiopathic pulmonary fibrosis || id:finn-b-IPF	exposure	Inverse variance weighted	13	0.469092	0.261651	0.0730024	-0.0437439	0.981927	1.59854	0.957199	2.6696
1010	M32560	finn-b-IPF	Idiopathic pulmonary fibrosis || id:finn-b-IPF	exposure	Simple mode	13	0.821912	0.53308	0.149066	-0.222925	1.86675	2.27485	0.800175	6.46724
1011	M32560	finn-b-IPF	Idiopathic pulmonary fibrosis || id:finn-b-IPF	exposure	Weighted mode	13	0.632534	0.447558	0.182979	-0.244679	1.50975	1.88237	0.782956	4.52559
1012	M32564	finn-b-IPF	Idiopathic pulmonary fibrosis || id:finn-b-IPF	exposure	MR Egger	18	-0.536339	0.746338	0.482734	-1.99916	0.926484	0.584886	0.135449	2.52561
1013	M32564	finn-b-IPF	Idiopathic pulmonary fibrosis || id:finn-b-IPF	exposure	Weighted median	18	0.407161	0.420802	0.333253	-0.417612	1.23193	1.50255	0.658618	3.42785
1014	M32564	finn-b-IPF	Idiopathic pulmonary fibrosis || id:finn-b-IPF	exposure	Inverse variance weighted	18	-0.101642	0.296453	0.731704	-0.682689	0.479406	0.903353	0.505257	1.61511
1015	M32564	finn-b-IPF	Idiopathic pulmonary fibrosis || id:finn-b-IPF	exposure	Simple mode	18	0.876751	0.827427	0.304145	-0.745005	2.49851	2.40308	0.474732	12.1643
1016	M32564	finn-b-IPF	Idiopathic pulmonary fibrosis || id:finn-b-IPF	exposure	Weighted mode	18	0.769617	0.759113	0.324874	-0.718244	2.25748	2.15894	0.487608	9.55896
1017	M32578	finn-b-IPF	Idiopathic pulmonary fibrosis || id:finn-b-IPF	exposure	MR Egger	16	1.68181	1.03013	0.124831	-0.337249	3.70086	5.37525	0.713731	40.4821
1018	M32578	finn-b-IPF	Idiopathic pulmonary fibrosis || id:finn-b-IPF	exposure	Weighted median	16	1.31514	0.585133	0.0246023	0.168279	2.462	3.72527	1.18327	11.7282
1019	M32578	finn-b-IPF	Idiopathic pulmonary fibrosis || id:finn-b-IPF	exposure	Inverse variance weighted	16	0.84212	0.424656	0.0473603	0.00979428	1.67445	2.32128	1.00984	5.33584
1020	M32578	finn-b-IPF	Idiopathic pulmonary fibrosis || id:finn-b-IPF	exposure	Simple mode	16	1.53549	0.814222	0.0788339	-0.0603851	3.13136	4.6436	0.941402	22.9052
1021	M32578	finn-b-IPF	Idiopathic pulmonary fibrosis || id:finn-b-IPF	exposure	Weighted mode	16	1.44711	0.699718	0.056325	0.0756658	2.81856	4.25083	1.0786	16.7527
1022	M32586	finn-b-IPF	Idiopathic pulmonary fibrosis || id:finn-b-IPF	exposure	MR Egger	9	-0.384478	0.529986	0.491711	-1.42325	0.654295	0.680806	0.24093	1.92379
1023	M32586	finn-b-IPF	Idiopathic pulmonary fibrosis || id:finn-b-IPF	exposure	Weighted median	9	-0.384936	0.34838	0.269189	-1.06776	0.297888	0.680494	0.343778	1.34701
1024	M32586	finn-b-IPF	Idiopathic pulmonary fibrosis || id:finn-b-IPF	exposure	Inverse variance weighted	9	-0.523133	0.29624	0.0774112	-1.10376	0.0574977	0.592661	0.331621	1.05918
1025	M32586	finn-b-IPF	Idiopathic pulmonary fibrosis || id:finn-b-IPF	exposure	Simple mode	9	-0.162737	0.657982	0.810884	-1.45238	1.12691	0.849814	0.234012	3.0861
1026	M32586	finn-b-IPF	Idiopathic pulmonary fibrosis || id:finn-b-IPF	exposure	Weighted mode	9	-0.392553	0.342952	0.285451	-1.06474	0.279633	0.675331	0.344818	1.32264
1027	M32587	finn-b-IPF	Idiopathic pulmonary fibrosis || id:finn-b-IPF	exposure	MR Egger	11	-1.04237	3.56251	0.776466	-8.02489	5.94016	0.352619	0.000327215	379.994
1028	M32587	finn-b-IPF	Idiopathic pulmonary fibrosis || id:finn-b-IPF	exposure	Weighted median	11	0.0976202	1.14058	0.931794	-2.13792	2.33317	1.10254	0.117899	10.3105
1029	M32587	finn-b-IPF	Idiopathic pulmonary fibrosis || id:finn-b-IPF	exposure	Inverse variance weighted	11	0.109908	0.994537	0.912004	-1.83939	2.0592	1.11618	0.158915	7.83971
1030	M32587	finn-b-IPF	Idiopathic pulmonary fibrosis || id:finn-b-IPF	exposure	Simple mode	11	2.01053	2.47969	0.436353	-2.84966	6.87073	7.46728	0.0578637	963.649
1031	M32587	finn-b-IPF	Idiopathic pulmonary fibrosis || id:finn-b-IPF	exposure	Weighted mode	11	-2.66938	1.83645	0.176722	-6.26883	0.930067	0.0692952	0.00189445	2.53468
1032	M32593	finn-b-IPF	Idiopathic pulmonary fibrosis || id:finn-b-IPF	exposure	MR Egger	12	0.853303	0.978222	0.403503	-1.06401	2.77062	2.34739	0.345069	15.9685
1033	M32593	finn-b-IPF	Idiopathic pulmonary fibrosis || id:finn-b-IPF	exposure	Weighted median	12	0.125885	0.744746	0.865773	-1.33382	1.58559	1.13415	0.26347	4.88215
1034	M32593	finn-b-IPF	Idiopathic pulmonary fibrosis || id:finn-b-IPF	exposure	Inverse variance weighted	12	0.381476	0.520771	0.46385	-0.639235	1.40219	1.46445	0.527696	4.06408
1035	M32593	finn-b-IPF	Idiopathic pulmonary fibrosis || id:finn-b-IPF	exposure	Simple mode	12	-0.271319	1.18072	0.82247	-2.58552	2.04288	0.762373	0.0753568	7.71281
1036	M32593	finn-b-IPF	Idiopathic pulmonary fibrosis || id:finn-b-IPF	exposure	Weighted mode	12	0.0430742	0.828271	0.959457	-1.58034	1.66648	1.04402	0.205906	5.29353
1037	M32616	finn-b-IPF	Idiopathic pulmonary fibrosis || id:finn-b-IPF	exposure	MR Egger	12	3.58211	1.4999	0.038073	0.642312	6.5219	35.9492	1.90087	679.87
1038	M32616	finn-b-IPF	Idiopathic pulmonary fibrosis || id:finn-b-IPF	exposure	Weighted median	12	-0.180043	0.417206	0.666072	-0.997766	0.63768	0.835234	0.368702	1.89209
1039	M32616	finn-b-IPF	Idiopathic pulmonary fibrosis || id:finn-b-IPF	exposure	Inverse variance weighted	12	0.289074	0.331244	0.382831	-0.360164	0.938313	1.33519	0.697562	2.55567
1040	M32616	finn-b-IPF	Idiopathic pulmonary fibrosis || id:finn-b-IPF	exposure	Simple mode	12	-0.495109	0.711316	0.500842	-1.88929	0.899071	0.609504	0.151179	2.45732
1041	M32616	finn-b-IPF	Idiopathic pulmonary fibrosis || id:finn-b-IPF	exposure	Weighted mode	12	-0.508146	0.740073	0.50654	-1.95869	0.942396	0.60161	0.141043	2.56612
1042	M32632	finn-b-IPF	Idiopathic pulmonary fibrosis || id:finn-b-IPF	exposure	MR Egger	25	-0.432617	0.691896	0.537953	-1.78873	0.923499	0.648809	0.167172	2.51808
1043	M32632	finn-b-IPF	Idiopathic pulmonary fibrosis || id:finn-b-IPF	exposure	Weighted median	25	-0.626826	0.667738	0.34787	-1.93559	0.681941	0.534285	0.144339	1.97771
1044	M32632	finn-b-IPF	Idiopathic pulmonary fibrosis || id:finn-b-IPF	exposure	Inverse variance weighted	25	-0.247235	0.446101	0.579432	-1.12159	0.627122	0.780957	0.325761	1.87221
1045	M32632	finn-b-IPF	Idiopathic pulmonary fibrosis || id:finn-b-IPF	exposure	Simple mode	25	-0.505265	1.09423	0.648416	-2.64996	1.63943	0.603346	0.0706543	5.15222
1046	M32632	finn-b-IPF	Idiopathic pulmonary fibrosis || id:finn-b-IPF	exposure	Weighted mode	25	-0.850103	0.733342	0.257771	-2.28745	0.587247	0.427371	0.101525	1.79903
1047	M32634	finn-b-IPF	Idiopathic pulmonary fibrosis || id:finn-b-IPF	exposure	MR Egger	43	-2.12624	1.78382	0.240131	-5.62254	1.37005	0.119284	0.00361545	3.93554
1048	M32634	finn-b-IPF	Idiopathic pulmonary fibrosis || id:finn-b-IPF	exposure	Weighted median	43	-0.0930766	1.14883	0.935427	-2.34479	2.15863	0.911124	0.0958676	8.6593
1049	M32634	finn-b-IPF	Idiopathic pulmonary fibrosis || id:finn-b-IPF	exposure	Inverse variance weighted	43	-0.228483	0.754766	0.762103	-1.70783	1.25086	0.79574	0.18126	3.49334
1050	M32634	finn-b-IPF	Idiopathic pulmonary fibrosis || id:finn-b-IPF	exposure	Simple mode	43	2.07626	2.19389	0.349368	-2.22378	6.37629	7.97455	0.1082	587.742
1051	M32634	finn-b-IPF	Idiopathic pulmonary fibrosis || id:finn-b-IPF	exposure	Weighted mode	43	-0.203342	1.42229	0.886999	-2.99102	2.58434	0.815999	0.0502359	13.2546
1052	M32635	finn-b-IPF	Idiopathic pulmonary fibrosis || id:finn-b-IPF	exposure	MR Egger	13	0.217493	1.69633	0.900294	-3.10731	3.54229	1.24296	0.0447213	34.546
1053	M32635	finn-b-IPF	Idiopathic pulmonary fibrosis || id:finn-b-IPF	exposure	Weighted median	13	0.4024	0.884476	0.649139	-1.33117	2.13597	1.49541	0.264167	8.46528
1054	M32635	finn-b-IPF	Idiopathic pulmonary fibrosis || id:finn-b-IPF	exposure	Inverse variance weighted	13	0.622837	0.640337	0.330717	-0.632224	1.8779	1.86421	0.531409	6.53974
1055	M32635	finn-b-IPF	Idiopathic pulmonary fibrosis || id:finn-b-IPF	exposure	Simple mode	13	-0.289743	1.436	0.843476	-3.10431	2.52482	0.748456	0.0448556	12.4887
1056	M32635	finn-b-IPF	Idiopathic pulmonary fibrosis || id:finn-b-IPF	exposure	Weighted mode	13	0.294909	0.968147	0.76588	-1.60266	2.19248	1.343	0.20136	8.95737
1057	M32644	finn-b-IPF	Idiopathic pulmonary fibrosis || id:finn-b-IPF	exposure	MR Egger	31	-4.56057	2.7861	0.112459	-10.0213	0.900189	0.0104561	4.44e-05	2.46007
1058	M32644	finn-b-IPF	Idiopathic pulmonary fibrosis || id:finn-b-IPF	exposure	Weighted median	31	-0.472623	1.28894	0.713861	-2.99895	2.0537	0.623365	0.0498393	7.79673
1059	M32644	finn-b-IPF	Idiopathic pulmonary fibrosis || id:finn-b-IPF	exposure	Inverse variance weighted	31	-0.4464	0.982525	0.649584	-2.37215	1.47935	0.639928	0.09328	4.39009
1060	M32644	finn-b-IPF	Idiopathic pulmonary fibrosis || id:finn-b-IPF	exposure	Simple mode	31	-1.94034	2.66317	0.471906	-7.16016	3.27947	0.143655	0.000776931	26.5618
1061	M32644	finn-b-IPF	Idiopathic pulmonary fibrosis || id:finn-b-IPF	exposure	Weighted mode	31	-2.59951	2.21362	0.249503	-6.9382	1.73918	0.07431	0.00097001	5.6927
1062	M32651	finn-b-IPF	Idiopathic pulmonary fibrosis || id:finn-b-IPF	exposure	MR Egger	25	1.0625	2.02455	0.604739	-2.90562	5.03063	2.8936	0.0547147	153.029
1063	M32651	finn-b-IPF	Idiopathic pulmonary fibrosis || id:finn-b-IPF	exposure	Weighted median	25	-0.824097	0.964329	0.392783	-2.71418	1.06599	0.438631	0.0662591	2.9037
1064	M32651	finn-b-IPF	Idiopathic pulmonary fibrosis || id:finn-b-IPF	exposure	Inverse variance weighted	25	0.269132	0.644606	0.676303	-0.994296	1.53256	1.30883	0.369984	4.63001
1065	M32651	finn-b-IPF	Idiopathic pulmonary fibrosis || id:finn-b-IPF	exposure	Simple mode	25	-0.765581	1.65663	0.648148	-4.01257	2.4814	0.465064	0.0180869	11.9581
1066	M32651	finn-b-IPF	Idiopathic pulmonary fibrosis || id:finn-b-IPF	exposure	Weighted mode	25	-0.865044	1.37713	0.535837	-3.56421	1.83412	0.421033	0.0283193	6.25965
1067	M32654	finn-b-IPF	Idiopathic pulmonary fibrosis || id:finn-b-IPF	exposure	MR Egger	21	-1.66894	2.35602	0.487314	-6.28673	2.94885	0.188447	0.00186084	19.084
1068	M32654	finn-b-IPF	Idiopathic pulmonary fibrosis || id:finn-b-IPF	exposure	Weighted median	21	0.912252	1.15873	0.431114	-1.35886	3.18336	2.48992	0.256955	24.1277
1069	M32654	finn-b-IPF	Idiopathic pulmonary fibrosis || id:finn-b-IPF	exposure	Inverse variance weighted	21	0.490146	0.772835	0.525938	-1.02461	2.0049	1.63255	0.358936	7.42536
1070	M32654	finn-b-IPF	Idiopathic pulmonary fibrosis || id:finn-b-IPF	exposure	Simple mode	21	-1.75427	2.02959	0.397646	-5.73226	2.22373	0.173034	0.00323974	9.24171
1071	M32654	finn-b-IPF	Idiopathic pulmonary fibrosis || id:finn-b-IPF	exposure	Weighted mode	21	1.3696	1.8164	0.459624	-2.19054	4.92973	3.93377	0.111856	138.343
1072	M32672	finn-b-IPF	Idiopathic pulmonary fibrosis || id:finn-b-IPF	exposure	MR Egger	18	0.644771	1.29034	0.624095	-1.8843	3.17384	1.90555	0.151935	23.8991
1073	M32672	finn-b-IPF	Idiopathic pulmonary fibrosis || id:finn-b-IPF	exposure	Weighted median	18	-0.400248	0.665106	0.547321	-1.70386	0.903361	0.670154	0.181981	2.46788
1074	M32672	finn-b-IPF	Idiopathic pulmonary fibrosis || id:finn-b-IPF	exposure	Inverse variance weighted	18	-0.402288	0.502163	0.423067	-1.38653	0.581951	0.668788	0.249942	1.78953
1075	M32672	finn-b-IPF	Idiopathic pulmonary fibrosis || id:finn-b-IPF	exposure	Simple mode	18	-0.318759	1.25612	0.802721	-2.78076	2.14324	0.727051	0.0619915	8.52701
1076	M32672	finn-b-IPF	Idiopathic pulmonary fibrosis || id:finn-b-IPF	exposure	Weighted mode	18	-0.217565	0.908524	0.813604	-1.99827	1.56314	0.804475	0.135569	4.7738
1077	M32675	finn-b-IPF	Idiopathic pulmonary fibrosis || id:finn-b-IPF	exposure	MR Egger	22	3.00689	3.55512	0.407674	-3.96114	9.97493	20.2245	0.0190413	21481.1
1078	M32675	finn-b-IPF	Idiopathic pulmonary fibrosis || id:finn-b-IPF	exposure	Weighted median	22	0.34108	1.84266	0.853149	-3.27053	3.95269	1.40647	0.0379865	52.0751
1079	M32675	finn-b-IPF	Idiopathic pulmonary fibrosis || id:finn-b-IPF	exposure	Inverse variance weighted	22	0.823737	1.25565	0.511809	-1.63734	3.28481	2.279	0.194497	26.704
1080	M32675	finn-b-IPF	Idiopathic pulmonary fibrosis || id:finn-b-IPF	exposure	Simple mode	22	1.838	3.37038	0.591267	-4.76796	8.44395	6.28393	0.00849772	4646.87
1081	M32675	finn-b-IPF	Idiopathic pulmonary fibrosis || id:finn-b-IPF	exposure	Weighted mode	22	0.642556	2.72091	0.815601	-4.69043	5.97555	1.90133	0.0091827	393.683
1082	M32691	finn-b-IPF	Idiopathic pulmonary fibrosis || id:finn-b-IPF	exposure	MR Egger	17	-0.174987	0.866144	0.842608	-1.87263	1.52266	0.839468	0.153719	4.58438
1083	M32691	finn-b-IPF	Idiopathic pulmonary fibrosis || id:finn-b-IPF	exposure	Weighted median	17	-0.10664	0.501627	0.831648	-1.08983	0.876549	0.898849	0.336274	2.40259
1084	M32691	finn-b-IPF	Idiopathic pulmonary fibrosis || id:finn-b-IPF	exposure	Inverse variance weighted	17	0.144837	0.35418	0.682586	-0.549355	0.83903	1.15585	0.577322	2.31412
1085	M32691	finn-b-IPF	Idiopathic pulmonary fibrosis || id:finn-b-IPF	exposure	Simple mode	17	0.0807186	0.764763	0.917254	-1.41822	1.57965	1.08407	0.242146	4.85327
1086	M32691	finn-b-IPF	Idiopathic pulmonary fibrosis || id:finn-b-IPF	exposure	Weighted mode	17	-0.0243373	0.596532	0.967962	-1.19354	1.14487	0.975956	0.303146	3.14202
1087	M32698	finn-b-IPF	Idiopathic pulmonary fibrosis || id:finn-b-IPF	exposure	MR Egger	16	0.093591	2.59265	0.971713	-4.988	5.17518	1.09811	0.00681931	176.828
1088	M32698	finn-b-IPF	Idiopathic pulmonary fibrosis || id:finn-b-IPF	exposure	Weighted median	16	0.87545	1.29402	0.4987	-1.66082	3.41172	2.39995	0.189983	30.3174
1089	M32698	finn-b-IPF	Idiopathic pulmonary fibrosis || id:finn-b-IPF	exposure	Inverse variance weighted	16	0.872429	0.973926	0.370367	-1.03647	2.78132	2.39272	0.354706	16.1404
1090	M32698	finn-b-IPF	Idiopathic pulmonary fibrosis || id:finn-b-IPF	exposure	Simple mode	16	3.13131	2.12475	0.161229	-1.0332	7.29581	22.9039	0.355868	1474.11
1091	M32698	finn-b-IPF	Idiopathic pulmonary fibrosis || id:finn-b-IPF	exposure	Weighted mode	16	0.665918	1.89558	0.730248	-3.04941	4.38125	1.94628	0.0473867	79.9378
1092	M32709	finn-b-IPF	Idiopathic pulmonary fibrosis || id:finn-b-IPF	exposure	MR Egger	27	0.597102	0.931125	0.527183	-1.2279	2.42211	1.81685	0.292906	11.2696
1093	M32709	finn-b-IPF	Idiopathic pulmonary fibrosis || id:finn-b-IPF	exposure	Weighted median	27	0.252658	0.706786	0.720736	-1.13264	1.63796	1.28744	0.322181	5.14466
1094	M32709	finn-b-IPF	Idiopathic pulmonary fibrosis || id:finn-b-IPF	exposure	Inverse variance weighted	27	-0.262501	0.498582	0.598544	-1.23972	0.714719	0.769125	0.289465	2.04361
1095	M32709	finn-b-IPF	Idiopathic pulmonary fibrosis || id:finn-b-IPF	exposure	Simple mode	27	-0.56529	1.22827	0.649174	-2.97269	1.84211	0.568195	0.0511655	6.30984
1096	M32709	finn-b-IPF	Idiopathic pulmonary fibrosis || id:finn-b-IPF	exposure	Weighted mode	27	0.16747	0.775337	0.830676	-1.35219	1.68713	1.18231	0.258673	5.40395
1097	M32729	finn-b-IPF	Idiopathic pulmonary fibrosis || id:finn-b-IPF	exposure	MR Egger	42	-1.0098	1.75752	0.568805	-4.45453	2.43493	0.364291	0.0116257	11.415
1098	M32729	finn-b-IPF	Idiopathic pulmonary fibrosis || id:finn-b-IPF	exposure	Weighted median	42	0.166128	1.0823	0.878008	-1.95519	2.28744	1.18072	0.141538	9.84972
1099	M32729	finn-b-IPF	Idiopathic pulmonary fibrosis || id:finn-b-IPF	exposure	Inverse variance weighted	42	0.127823	0.720323	0.859153	-1.28401	1.53966	1.13635	0.276925	4.66299
1100	M32729	finn-b-IPF	Idiopathic pulmonary fibrosis || id:finn-b-IPF	exposure	Simple mode	42	0.182678	2.40521	0.939827	-4.53153	4.89689	1.20043	0.0107642	133.872
1101	M32729	finn-b-IPF	Idiopathic pulmonary fibrosis || id:finn-b-IPF	exposure	Weighted mode	42	0.0389827	1.40996	0.978077	-2.72453	2.80249	1.03975	0.0655771	16.4857
1102	M32735	finn-b-IPF	Idiopathic pulmonary fibrosis || id:finn-b-IPF	exposure	MR Egger	17	-0.478747	1.0329	0.649663	-2.50324	1.54575	0.619559	0.0818195	4.69147
1103	M32735	finn-b-IPF	Idiopathic pulmonary fibrosis || id:finn-b-IPF	exposure	Weighted median	17	-0.0602029	0.465526	0.897103	-0.972635	0.852229	0.941573	0.378086	2.34487
1104	M32735	finn-b-IPF	Idiopathic pulmonary fibrosis || id:finn-b-IPF	exposure	Inverse variance weighted	17	0.18801	0.346571	0.587483	-0.491269	0.867289	1.20685	0.611849	2.38045
1105	M32735	finn-b-IPF	Idiopathic pulmonary fibrosis || id:finn-b-IPF	exposure	Simple mode	17	0.0846475	0.778784	0.914798	-1.44177	1.61106	1.08833	0.236509	5.00813
1106	M32735	finn-b-IPF	Idiopathic pulmonary fibrosis || id:finn-b-IPF	exposure	Weighted mode	17	-0.195946	0.581183	0.740386	-1.33506	0.943173	0.822057	0.263141	2.56812
1107	M32739	finn-b-IPF	Idiopathic pulmonary fibrosis || id:finn-b-IPF	exposure	MR Egger	7	1.49157	3.97237	0.722702	-6.29428	9.27741	4.44405	0.00184684	10693.7
1108	M32739	finn-b-IPF	Idiopathic pulmonary fibrosis || id:finn-b-IPF	exposure	Weighted median	7	1.44979	1.65963	0.382358	-1.80309	4.70267	4.26222	0.164788	110.241
1109	M32739	finn-b-IPF	Idiopathic pulmonary fibrosis || id:finn-b-IPF	exposure	Inverse variance weighted	7	0.710559	1.28002	0.578815	-1.79828	3.21939	2.03513	0.165584	25.0129
1110	M32739	finn-b-IPF	Idiopathic pulmonary fibrosis || id:finn-b-IPF	exposure	Simple mode	7	1.96152	2.45809	0.455293	-2.85634	6.77938	7.11013	0.057479	879.521
1111	M32739	finn-b-IPF	Idiopathic pulmonary fibrosis || id:finn-b-IPF	exposure	Weighted mode	7	1.98585	2.16532	0.39445	-2.25818	6.22989	7.28527	0.104541	507.698
1112	M32740	finn-b-IPF	Idiopathic pulmonary fibrosis || id:finn-b-IPF	exposure	MR Egger	45	1.09036	2.66293	0.684236	-4.12899	6.30971	2.97535	0.0160992	549.886
1113	M32740	finn-b-IPF	Idiopathic pulmonary fibrosis || id:finn-b-IPF	exposure	Weighted median	45	0.848272	1.17713	0.471137	-1.45889	3.15544	2.33561	0.232493	23.4633
1114	M32740	finn-b-IPF	Idiopathic pulmonary fibrosis || id:finn-b-IPF	exposure	Inverse variance weighted	45	0.730845	0.834052	0.38089	-0.903898	2.36559	2.07683	0.404988	10.6503
1115	M32740	finn-b-IPF	Idiopathic pulmonary fibrosis || id:finn-b-IPF	exposure	Simple mode	45	4.55488	2.45947	0.0707455	-0.26567	9.37544	95.0958	0.766692	11795.1
1116	M32740	finn-b-IPF	Idiopathic pulmonary fibrosis || id:finn-b-IPF	exposure	Weighted mode	45	3.79863	2.30379	0.106298	-0.716788	8.31405	44.6401	0.488318	4080.82
1117	M32753	finn-b-IPF	Idiopathic pulmonary fibrosis || id:finn-b-IPF	exposure	MR Egger	12	1.75633	1.70157	0.326303	-1.57875	5.09141	5.79117	0.206234	162.62
1118	M32753	finn-b-IPF	Idiopathic pulmonary fibrosis || id:finn-b-IPF	exposure	Weighted median	12	0.795938	0.592566	0.179206	-0.365492	1.95737	2.21652	0.693855	7.08066
1119	M32753	finn-b-IPF	Idiopathic pulmonary fibrosis || id:finn-b-IPF	exposure	Inverse variance weighted	12	0.207926	0.49371	0.673646	-0.759747	1.1756	1.23112	0.467785	3.24008
1120	M32753	finn-b-IPF	Idiopathic pulmonary fibrosis || id:finn-b-IPF	exposure	Simple mode	12	0.81929	0.852236	0.357037	-0.851094	2.48967	2.26889	0.426948	12.0573
1121	M32753	finn-b-IPF	Idiopathic pulmonary fibrosis || id:finn-b-IPF	exposure	Weighted mode	12	0.917684	0.715049	0.225735	-0.483812	2.31918	2.50349	0.616429	10.1673
1122	M32754	finn-b-IPF	Idiopathic pulmonary fibrosis || id:finn-b-IPF	exposure	MR Egger	15	0.172363	0.220332	0.448061	-0.259487	0.604213	1.18811	0.771447	1.82981
1123	M32754	finn-b-IPF	Idiopathic pulmonary fibrosis || id:finn-b-IPF	exposure	Weighted median	15	0.144123	0.196162	0.462511	-0.240353	0.5286	1.15503	0.78635	1.69656
1124	M32754	finn-b-IPF	Idiopathic pulmonary fibrosis || id:finn-b-IPF	exposure	Inverse variance weighted	15	0.0979888	0.152887	0.521573	-0.20167	0.397647	1.10295	0.817365	1.48832
1125	M32754	finn-b-IPF	Idiopathic pulmonary fibrosis || id:finn-b-IPF	exposure	Simple mode	15	0.0702686	0.302721	0.819801	-0.523065	0.663602	1.0728	0.592701	1.94177
1126	M32754	finn-b-IPF	Idiopathic pulmonary fibrosis || id:finn-b-IPF	exposure	Weighted mode	15	0.141903	0.191595	0.471151	-0.233622	0.517428	1.15246	0.791661	1.67771
1127	M32755	finn-b-IPF	Idiopathic pulmonary fibrosis || id:finn-b-IPF	exposure	MR Egger	24	0.66201	0.890243	0.46497	-1.08287	2.40689	1.93868	0.338624	11.0993
1128	M32755	finn-b-IPF	Idiopathic pulmonary fibrosis || id:finn-b-IPF	exposure	Weighted median	24	0.139158	0.592954	0.814453	-1.02303	1.30135	1.14931	0.359503	3.67425
1129	M32755	finn-b-IPF	Idiopathic pulmonary fibrosis || id:finn-b-IPF	exposure	Inverse variance weighted	24	-0.0672455	0.43114	0.876056	-0.912279	0.777788	0.934966	0.401608	2.17665
1130	M32755	finn-b-IPF	Idiopathic pulmonary fibrosis || id:finn-b-IPF	exposure	Simple mode	24	-0.0322896	0.967512	0.973664	-1.92861	1.86403	0.968226	0.14535	6.44971
1131	M32755	finn-b-IPF	Idiopathic pulmonary fibrosis || id:finn-b-IPF	exposure	Weighted mode	24	0.272245	0.749172	0.719629	-1.19613	1.74062	1.31291	0.302362	5.70089
1132	M32757	finn-b-IPF	Idiopathic pulmonary fibrosis || id:finn-b-IPF	exposure	MR Egger	18	-0.156221	0.452111	0.734192	-1.04236	0.729917	0.85537	0.352622	2.07491
1133	M32757	finn-b-IPF	Idiopathic pulmonary fibrosis || id:finn-b-IPF	exposure	Weighted median	18	0.0915607	0.355721	0.796874	-0.605652	0.788773	1.09588	0.545719	2.2007
1134	M32757	finn-b-IPF	Idiopathic pulmonary fibrosis || id:finn-b-IPF	exposure	Inverse variance weighted	18	0.120616	0.300071	0.687715	-0.467524	0.708756	1.12819	0.626552	2.03146
1135	M32757	finn-b-IPF	Idiopathic pulmonary fibrosis || id:finn-b-IPF	exposure	Simple mode	18	0.940206	0.950569	0.336485	-0.92291	2.80332	2.56051	0.397361	16.4994
1136	M32757	finn-b-IPF	Idiopathic pulmonary fibrosis || id:finn-b-IPF	exposure	Weighted mode	18	0.0821173	0.362995	0.823727	-0.629353	0.793587	1.08558	0.532937	2.21131
1137	M32758	finn-b-IPF	Idiopathic pulmonary fibrosis || id:finn-b-IPF	exposure	MR Egger	12	-0.792243	0.535397	0.169745	-1.84162	0.257135	0.452828	0.15856	1.29322
1138	M32758	finn-b-IPF	Idiopathic pulmonary fibrosis || id:finn-b-IPF	exposure	Weighted median	12	-0.335157	0.40072	0.402937	-1.12057	0.450254	0.715226	0.326094	1.56871
1139	M32758	finn-b-IPF	Idiopathic pulmonary fibrosis || id:finn-b-IPF	exposure	Inverse variance weighted	12	-0.107168	0.343131	0.754795	-0.779704	0.565369	0.898375	0.458542	1.7601
1140	M32758	finn-b-IPF	Idiopathic pulmonary fibrosis || id:finn-b-IPF	exposure	Simple mode	12	1.79572	1.09232	0.128435	-0.345231	3.93668	6.02383	0.708057	51.248
1141	M32758	finn-b-IPF	Idiopathic pulmonary fibrosis || id:finn-b-IPF	exposure	Weighted mode	12	-0.484341	0.403776	0.255522	-1.27574	0.30706	0.616103	0.279223	1.35942
1142	M32759	finn-b-IPF	Idiopathic pulmonary fibrosis || id:finn-b-IPF	exposure	MR Egger	17	-0.42587	0.460284	0.369491	-1.32803	0.476287	0.653201	0.264999	1.61009
1143	M32759	finn-b-IPF	Idiopathic pulmonary fibrosis || id:finn-b-IPF	exposure	Weighted median	17	-0.388142	0.393062	0.323406	-1.15854	0.38226	0.678316	0.313943	1.46559
1144	M32759	finn-b-IPF	Idiopathic pulmonary fibrosis || id:finn-b-IPF	exposure	Inverse variance weighted	17	0.177245	0.298296	0.552384	-0.407416	0.761906	1.19392	0.665367	2.14236
1145	M32759	finn-b-IPF	Idiopathic pulmonary fibrosis || id:finn-b-IPF	exposure	Simple mode	17	1.93897	0.988968	0.0675752	0.000589555	3.87734	6.95157	1.00059	48.2958
1146	M32759	finn-b-IPF	Idiopathic pulmonary fibrosis || id:finn-b-IPF	exposure	Weighted mode	17	-0.412075	0.364312	0.274681	-1.12613	0.301977	0.662274	0.324287	1.35253
1147	M32761	finn-b-IPF	Idiopathic pulmonary fibrosis || id:finn-b-IPF	exposure	MR Egger	12	0.0684531	2.31411	0.976984	-4.46721	4.60412	1.07085	0.0114793	99.8949
1148	M32761	finn-b-IPF	Idiopathic pulmonary fibrosis || id:finn-b-IPF	exposure	Weighted median	12	-0.656422	1.00615	0.514139	-2.62848	1.31564	0.518704	0.0721878	3.72714
1149	M32761	finn-b-IPF	Idiopathic pulmonary fibrosis || id:finn-b-IPF	exposure	Inverse variance weighted	12	-0.403775	0.93855	0.667042	-2.24333	1.43578	0.667794	0.106104	4.20294
1150	M32761	finn-b-IPF	Idiopathic pulmonary fibrosis || id:finn-b-IPF	exposure	Simple mode	12	-1.0547	1.634	0.531854	-4.25733	2.14793	0.348297	0.01416	8.56715
1151	M32761	finn-b-IPF	Idiopathic pulmonary fibrosis || id:finn-b-IPF	exposure	Weighted mode	12	-0.956881	1.2846	0.471957	-3.47471	1.56094	0.384089	0.0309709	4.76332
1152	M32762	finn-b-IPF	Idiopathic pulmonary fibrosis || id:finn-b-IPF	exposure	MR Egger	15	-1.61228	0.851694	0.0808287	-3.2816	0.0570407	0.199432	0.0375681	1.0587
1153	M32762	finn-b-IPF	Idiopathic pulmonary fibrosis || id:finn-b-IPF	exposure	Weighted median	15	-0.177877	0.390069	0.64838	-0.942412	0.586658	0.837045	0.389687	1.79797
1154	M32762	finn-b-IPF	Idiopathic pulmonary fibrosis || id:finn-b-IPF	exposure	Inverse variance weighted	15	-0.422449	0.271664	0.119937	-0.95491	0.110013	0.65544	0.384847	1.11629
1155	M32762	finn-b-IPF	Idiopathic pulmonary fibrosis || id:finn-b-IPF	exposure	Simple mode	15	0.193079	0.644395	0.768863	-1.06993	1.45609	1.21298	0.343031	4.28917
1156	M32762	finn-b-IPF	Idiopathic pulmonary fibrosis || id:finn-b-IPF	exposure	Weighted mode	15	0.165791	0.628221	0.795698	-1.06552	1.3971	1.18033	0.344548	4.04347
1157	M32769	finn-b-IPF	Idiopathic pulmonary fibrosis || id:finn-b-IPF	exposure	MR Egger	5	-1.96448	2.25275	0.447365	-6.37988	2.45092	0.140228	0.00169532	11.599
1158	M32769	finn-b-IPF	Idiopathic pulmonary fibrosis || id:finn-b-IPF	exposure	Weighted median	5	-0.115239	0.77863	0.882341	-1.64135	1.41088	0.891153	0.193718	4.09954
1159	M32769	finn-b-IPF	Idiopathic pulmonary fibrosis || id:finn-b-IPF	exposure	Inverse variance weighted	5	-0.0876084	0.620688	0.887754	-1.30416	1.12894	0.91612	0.271401	3.09238
1160	M32769	finn-b-IPF	Idiopathic pulmonary fibrosis || id:finn-b-IPF	exposure	Simple mode	5	0.137833	1.1698	0.911885	-2.15498	2.43065	1.14778	0.115906	11.3662
1161	M32769	finn-b-IPF	Idiopathic pulmonary fibrosis || id:finn-b-IPF	exposure	Weighted mode	5	-0.20454	1.16349	0.868993	-2.48498	2.0759	0.815022	0.0833274	7.9717
1162	M32786	finn-b-IPF	Idiopathic pulmonary fibrosis || id:finn-b-IPF	exposure	MR Egger	17	0.728756	1.45319	0.623308	-2.11949	3.57701	2.0725	0.120092	35.7663
1163	M32786	finn-b-IPF	Idiopathic pulmonary fibrosis || id:finn-b-IPF	exposure	Weighted median	17	0.216868	0.461997	0.638773	-0.688645	1.12238	1.24218	0.502256	3.07216
1164	M32786	finn-b-IPF	Idiopathic pulmonary fibrosis || id:finn-b-IPF	exposure	Inverse variance weighted	17	0.0661328	0.333293	0.842714	-0.587121	0.719386	1.06837	0.555926	2.05317
1165	M32786	finn-b-IPF	Idiopathic pulmonary fibrosis || id:finn-b-IPF	exposure	Simple mode	17	0.215204	0.935088	0.820897	-1.61757	2.04798	1.24012	0.19838	7.75221
1166	M32786	finn-b-IPF	Idiopathic pulmonary fibrosis || id:finn-b-IPF	exposure	Weighted mode	17	0.304954	0.840878	0.721604	-1.34317	1.95307	1.35656	0.261018	7.05033
1167	M32787	finn-b-IPF	Idiopathic pulmonary fibrosis || id:finn-b-IPF	exposure	MR Egger	10	0.225826	1.5928	0.89076	-2.89607	3.34772	1.25336	0.0552398	28.4379
1168	M32787	finn-b-IPF	Idiopathic pulmonary fibrosis || id:finn-b-IPF	exposure	Weighted median	10	0.376301	0.870653	0.665592	-1.33018	2.08278	1.45689	0.26443	8.02675
1169	M32787	finn-b-IPF	Idiopathic pulmonary fibrosis || id:finn-b-IPF	exposure	Inverse variance weighted	10	0.279628	0.686392	0.683723	-1.0657	1.62496	1.32264	0.344487	5.0782
1170	M32787	finn-b-IPF	Idiopathic pulmonary fibrosis || id:finn-b-IPF	exposure	Simple mode	10	0.190903	1.27568	0.884343	-2.30944	2.69124	1.21034	0.0993173	14.75
1171	M32787	finn-b-IPF	Idiopathic pulmonary fibrosis || id:finn-b-IPF	exposure	Weighted mode	10	0.43404	1.09599	0.701311	-1.7141	2.58218	1.54348	0.180126	13.2259
1172	M32795	finn-b-IPF	Idiopathic pulmonary fibrosis || id:finn-b-IPF	exposure	MR Egger	11	1.68772	0.644276	0.0278312	0.424936	2.9505	5.40712	1.52949	19.1155
1173	M32795	finn-b-IPF	Idiopathic pulmonary fibrosis || id:finn-b-IPF	exposure	Weighted median	11	1.13642	0.52204	0.0294887	0.113226	2.15962	3.11561	1.11988	8.66787
1174	M32795	finn-b-IPF	Idiopathic pulmonary fibrosis || id:finn-b-IPF	exposure	Inverse variance weighted	11	0.457829	0.447215	0.305961	-0.418713	1.33437	1.58064	0.657893	3.79761
1175	M32795	finn-b-IPF	Idiopathic pulmonary fibrosis || id:finn-b-IPF	exposure	Simple mode	11	0.775527	1.26157	0.552461	-1.69715	3.2482	2.17174	0.183205	25.744
1176	M32795	finn-b-IPF	Idiopathic pulmonary fibrosis || id:finn-b-IPF	exposure	Weighted mode	11	1.12283	0.506693	0.0510396	0.129712	2.11595	3.07354	1.1385	8.29746
1177	M32800	finn-b-IPF	Idiopathic pulmonary fibrosis || id:finn-b-IPF	exposure	MR Egger	10	-0.436038	0.318752	0.208514	-1.06079	0.188717	0.646593	0.346181	1.2077
1178	M32800	finn-b-IPF	Idiopathic pulmonary fibrosis || id:finn-b-IPF	exposure	Weighted median	10	-0.362903	0.326141	0.26583	-1.00214	0.276334	0.695654	0.367093	1.31829
1179	M32800	finn-b-IPF	Idiopathic pulmonary fibrosis || id:finn-b-IPF	exposure	Inverse variance weighted	10	-0.408886	0.236971	0.0844439	-0.87335	0.0555783	0.66439	0.41755	1.05715
1180	M32800	finn-b-IPF	Idiopathic pulmonary fibrosis || id:finn-b-IPF	exposure	Simple mode	10	-0.407813	0.582748	0.501732	-1.55	0.734374	0.665103	0.212248	2.08418
1181	M32800	finn-b-IPF	Idiopathic pulmonary fibrosis || id:finn-b-IPF	exposure	Weighted mode	10	-0.340643	0.293252	0.275275	-0.915417	0.234131	0.711313	0.40035	1.26381
1182	M32802	finn-b-IPF	Idiopathic pulmonary fibrosis || id:finn-b-IPF	exposure	MR Egger	5	2.64476	2.46112	0.361285	-2.17904	7.46856	14.08	0.11315	1752.08
1183	M32802	finn-b-IPF	Idiopathic pulmonary fibrosis || id:finn-b-IPF	exposure	Weighted median	5	1.44001	0.804434	0.0734397	-0.136683	3.0167	4.22073	0.872247	20.4237
1184	M32802	finn-b-IPF	Idiopathic pulmonary fibrosis || id:finn-b-IPF	exposure	Inverse variance weighted	5	0.630237	0.744455	0.397232	-0.828895	2.08937	1.87805	0.436531	8.07981
1185	M32802	finn-b-IPF	Idiopathic pulmonary fibrosis || id:finn-b-IPF	exposure	Simple mode	5	1.08278	1.21215	0.422198	-1.29303	3.45858	2.95286	0.274438	31.7719
1186	M32802	finn-b-IPF	Idiopathic pulmonary fibrosis || id:finn-b-IPF	exposure	Weighted mode	5	1.31224	0.871957	0.206789	-0.396791	3.02128	3.7145	0.672475	20.5175
1187	M32808	finn-b-IPF	Idiopathic pulmonary fibrosis || id:finn-b-IPF	exposure	MR Egger	12	-0.537307	0.702751	0.462185	-1.9147	0.840086	0.58432	0.147386	2.31657
1188	M32808	finn-b-IPF	Idiopathic pulmonary fibrosis || id:finn-b-IPF	exposure	Weighted median	12	-0.489539	0.473742	0.301442	-1.41807	0.438995	0.612909	0.24218	1.55115
1189	M32808	finn-b-IPF	Idiopathic pulmonary fibrosis || id:finn-b-IPF	exposure	Inverse variance weighted	12	-0.561937	0.349391	0.107762	-1.24674	0.122869	0.570104	0.287439	1.13074
1190	M32808	finn-b-IPF	Idiopathic pulmonary fibrosis || id:finn-b-IPF	exposure	Simple mode	12	-0.168232	0.859578	0.848402	-1.853	1.51654	0.845158	0.156765	4.55643
1191	M32808	finn-b-IPF	Idiopathic pulmonary fibrosis || id:finn-b-IPF	exposure	Weighted mode	12	-0.650376	0.617467	0.314792	-1.86061	0.559859	0.52185	0.155578	1.75043
1192	M32814	finn-b-IPF	Idiopathic pulmonary fibrosis || id:finn-b-IPF	exposure	MR Egger	13	-6.21214	5.76181	0.304039	-17.5053	5.08101	0.00200494	2.5e-08	160.937
1193	M32814	finn-b-IPF	Idiopathic pulmonary fibrosis || id:finn-b-IPF	exposure	Weighted median	13	-1.65538	1.33893	0.216332	-4.27969	0.968933	0.19102	0.0138469	2.63513
1194	M32814	finn-b-IPF	Idiopathic pulmonary fibrosis || id:finn-b-IPF	exposure	Inverse variance weighted	13	-1.31785	1.04723	0.208241	-3.37042	0.734718	0.26771	0.0343752	2.08489
1195	M32814	finn-b-IPF	Idiopathic pulmonary fibrosis || id:finn-b-IPF	exposure	Simple mode	13	-1.64363	2.0897	0.446807	-5.73945	2.45218	0.193277	0.00321655	11.6137
1196	M32814	finn-b-IPF	Idiopathic pulmonary fibrosis || id:finn-b-IPF	exposure	Weighted mode	13	-1.50156	2.10196	0.488669	-5.6214	2.61829	0.222783	0.00361956	13.7122
1197	M32836	finn-b-IPF	Idiopathic pulmonary fibrosis || id:finn-b-IPF	exposure	MR Egger	6	0.673547	3.10066	0.838662	-5.40375	6.75084	1.96118	0.00449969	854.776
1198	M32836	finn-b-IPF	Idiopathic pulmonary fibrosis || id:finn-b-IPF	exposure	Weighted median	6	-0.268927	0.733663	0.713952	-1.70691	1.16905	0.764199	0.181426	3.21894
1199	M32836	finn-b-IPF	Idiopathic pulmonary fibrosis || id:finn-b-IPF	exposure	Inverse variance weighted	6	0.175309	0.621959	0.778047	-1.04373	1.39435	1.19161	0.352138	4.03235
1200	M32836	finn-b-IPF	Idiopathic pulmonary fibrosis || id:finn-b-IPF	exposure	Simple mode	6	-0.402956	0.913167	0.677444	-2.19276	1.38685	0.668341	0.111608	4.00223
1201	M32836	finn-b-IPF	Idiopathic pulmonary fibrosis || id:finn-b-IPF	exposure	Weighted mode	6	-0.344597	0.786357	0.679513	-1.88586	1.19666	0.708505	0.151699	3.30905
1202	M32838	finn-b-IPF	Idiopathic pulmonary fibrosis || id:finn-b-IPF	exposure	MR Egger	11	2.5283	2.18395	0.276798	-1.75225	6.80885	12.5321	0.173383	905.825
1203	M32838	finn-b-IPF	Idiopathic pulmonary fibrosis || id:finn-b-IPF	exposure	Weighted median	11	1.26865	0.921946	0.168805	-0.538368	3.07566	3.55603	0.5837	21.6642
1204	M32838	finn-b-IPF	Idiopathic pulmonary fibrosis || id:finn-b-IPF	exposure	Inverse variance weighted	11	0.96302	0.661553	0.145477	-0.333623	2.25966	2.61959	0.716324	9.57986
1205	M32838	finn-b-IPF	Idiopathic pulmonary fibrosis || id:finn-b-IPF	exposure	Simple mode	11	1.63632	1.34574	0.251936	-1.00133	4.27398	5.13626	0.36739	71.8068
1206	M32838	finn-b-IPF	Idiopathic pulmonary fibrosis || id:finn-b-IPF	exposure	Weighted mode	11	1.36176	1.0887	0.239473	-0.772078	3.49561	3.90307	0.462052	32.9703
1207	M32846	finn-b-IPF	Idiopathic pulmonary fibrosis || id:finn-b-IPF	exposure	MR Egger	12	0.0208107	0.223895	0.92778	-0.418023	0.459644	1.02103	0.658347	1.58351
1208	M32846	finn-b-IPF	Idiopathic pulmonary fibrosis || id:finn-b-IPF	exposure	Weighted median	12	-0.0892459	0.187717	0.634482	-0.457171	0.278679	0.914621	0.633072	1.32138
1209	M32846	finn-b-IPF	Idiopathic pulmonary fibrosis || id:finn-b-IPF	exposure	Inverse variance weighted	12	-0.193005	0.165924	0.244742	-0.518216	0.132206	0.824478	0.595582	1.14134
1210	M32846	finn-b-IPF	Idiopathic pulmonary fibrosis || id:finn-b-IPF	exposure	Simple mode	12	-0.0535262	0.4742	0.912162	-0.982958	0.875905	0.947881	0.374203	2.40105
1211	M32846	finn-b-IPF	Idiopathic pulmonary fibrosis || id:finn-b-IPF	exposure	Weighted mode	12	-0.0639276	0.184341	0.735292	-0.425235	0.29738	0.938073	0.653616	1.34633
1212	M32847	finn-b-IPF	Idiopathic pulmonary fibrosis || id:finn-b-IPF	exposure	MR Egger	12	-0.287697	0.527198	0.597228	-1.32101	0.745612	0.749989	0.266867	2.10773
1213	M32847	finn-b-IPF	Idiopathic pulmonary fibrosis || id:finn-b-IPF	exposure	Weighted median	12	-0.440947	0.394442	0.263609	-1.21405	0.332159	0.643427	0.296991	1.39397
1214	M32847	finn-b-IPF	Idiopathic pulmonary fibrosis || id:finn-b-IPF	exposure	Inverse variance weighted	12	-0.356485	0.347996	0.305648	-1.03856	0.325586	0.700133	0.353965	1.38484
1215	M32847	finn-b-IPF	Idiopathic pulmonary fibrosis || id:finn-b-IPF	exposure	Simple mode	12	-0.597984	0.936236	0.536083	-2.43301	1.23704	0.549919	0.0877725	3.4454
1216	M32847	finn-b-IPF	Idiopathic pulmonary fibrosis || id:finn-b-IPF	exposure	Weighted mode	12	-0.473447	0.411322	0.274122	-1.27964	0.332744	0.622851	0.278138	1.39479
1217	M32854	finn-b-IPF	Idiopathic pulmonary fibrosis || id:finn-b-IPF	exposure	MR Egger	7	0.495468	0.891349	0.602259	-1.25158	2.24251	1.64127	0.286054	9.41695
1218	M32854	finn-b-IPF	Idiopathic pulmonary fibrosis || id:finn-b-IPF	exposure	Weighted median	7	-0.190922	0.419365	0.648919	-1.01288	0.631034	0.826197	0.363172	1.87955
1219	M32854	finn-b-IPF	Idiopathic pulmonary fibrosis || id:finn-b-IPF	exposure	Inverse variance weighted	7	-0.330902	0.448999	0.461136	-1.21094	0.549136	0.718275	0.297917	1.73176
1220	M32854	finn-b-IPF	Idiopathic pulmonary fibrosis || id:finn-b-IPF	exposure	Simple mode	7	-0.350825	0.735717	0.650341	-1.79283	1.09118	0.704107	0.166488	2.97779
1221	M32854	finn-b-IPF	Idiopathic pulmonary fibrosis || id:finn-b-IPF	exposure	Weighted mode	7	-0.157799	0.416329	0.717721	-0.973803	0.658206	0.854022	0.377644	1.93132
1222	M32855	finn-b-IPF	Idiopathic pulmonary fibrosis || id:finn-b-IPF	exposure	MR Egger	13	0.267267	0.771774	0.735649	-1.24541	1.77994	1.30639	0.287822	5.92953
1223	M32855	finn-b-IPF	Idiopathic pulmonary fibrosis || id:finn-b-IPF	exposure	Weighted median	13	-0.131374	0.416088	0.752203	-0.946907	0.684159	0.87689	0.387939	1.9821
1224	M32855	finn-b-IPF	Idiopathic pulmonary fibrosis || id:finn-b-IPF	exposure	Inverse variance weighted	13	0.0382388	0.417196	0.926971	-0.779465	0.855943	1.03898	0.458651	2.35359
1225	M32855	finn-b-IPF	Idiopathic pulmonary fibrosis || id:finn-b-IPF	exposure	Simple mode	13	1.31831	0.998584	0.211403	-0.638913	3.27554	3.73711	0.527866	26.4574
1226	M32855	finn-b-IPF	Idiopathic pulmonary fibrosis || id:finn-b-IPF	exposure	Weighted mode	13	-0.0880596	0.392866	0.826414	-0.858078	0.681959	0.915706	0.423976	1.97775
1227	M32857	finn-b-IPF	Idiopathic pulmonary fibrosis || id:finn-b-IPF	exposure	MR Egger	8	1.30732	1.65996	0.460924	-1.9462	4.56084	3.69624	0.142815	95.6634
1228	M32857	finn-b-IPF	Idiopathic pulmonary fibrosis || id:finn-b-IPF	exposure	Weighted median	8	0.611528	0.637243	0.337233	-0.637468	1.86052	1.84325	0.528629	6.4271
1229	M32857	finn-b-IPF	Idiopathic pulmonary fibrosis || id:finn-b-IPF	exposure	Inverse variance weighted	8	0.696689	0.496397	0.16047	-0.276248	1.66963	2.0071	0.758625	5.31018
1230	M32857	finn-b-IPF	Idiopathic pulmonary fibrosis || id:finn-b-IPF	exposure	Simple mode	8	0.633873	0.948194	0.525234	-1.22459	2.49233	1.8849	0.293879	12.0895
1231	M32857	finn-b-IPF	Idiopathic pulmonary fibrosis || id:finn-b-IPF	exposure	Weighted mode	8	0.686584	0.916944	0.478393	-1.11063	2.48379	1.98692	0.329353	11.9867
1232	M32863	finn-b-IPF	Idiopathic pulmonary fibrosis || id:finn-b-IPF	exposure	MR Egger	13	-0.370496	0.384307	0.35573	-1.12374	0.382746	0.690391	0.325062	1.46631
1233	M32863	finn-b-IPF	Idiopathic pulmonary fibrosis || id:finn-b-IPF	exposure	Weighted median	13	-0.118528	0.267791	0.658044	-0.643398	0.406342	0.888227	0.525504	1.50132
1234	M32863	finn-b-IPF	Idiopathic pulmonary fibrosis || id:finn-b-IPF	exposure	Inverse variance weighted	13	-0.225882	0.191324	0.237751	-0.600878	0.149113	0.797812	0.54833	1.1608
1235	M32863	finn-b-IPF	Idiopathic pulmonary fibrosis || id:finn-b-IPF	exposure	Simple mode	13	0.00977242	0.412156	0.981473	-0.798053	0.817598	1.00982	0.450205	2.26505
1236	M32863	finn-b-IPF	Idiopathic pulmonary fibrosis || id:finn-b-IPF	exposure	Weighted mode	13	-0.116268	0.334548	0.734207	-0.771983	0.539447	0.890237	0.462096	1.71506
1237	M32867	finn-b-IPF	Idiopathic pulmonary fibrosis || id:finn-b-IPF	exposure	MR Egger	19	4.20954	7.25978	0.569626	-10.0196	18.4387	67.3255	4.45e-05	1.0182e+08
1238	M32867	finn-b-IPF	Idiopathic pulmonary fibrosis || id:finn-b-IPF	exposure	Weighted median	19	6.11e-07	2.34075	1	-4.58787	4.58787	1	0.0101745	98.2853
1239	M32867	finn-b-IPF	Idiopathic pulmonary fibrosis || id:finn-b-IPF	exposure	Inverse variance weighted	19	-0.916206	1.75425	0.601477	-4.35454	2.52213	0.400034	0.0128483	12.4551
1240	M32867	finn-b-IPF	Idiopathic pulmonary fibrosis || id:finn-b-IPF	exposure	Simple mode	19	1.90957	4.11692	0.648326	-6.1596	9.97874	6.7502	0.0021131	21563.2
1241	M32867	finn-b-IPF	Idiopathic pulmonary fibrosis || id:finn-b-IPF	exposure	Weighted mode	19	1.5858	3.72509	0.675368	-5.71539	8.88698	4.88318	0.00329487	7237.14
1242	M32869	finn-b-IPF	Idiopathic pulmonary fibrosis || id:finn-b-IPF	exposure	MR Egger	16	-2.81467	2.58004	0.293719	-7.87155	2.2422	0.0599244	0.000381444	9.41405
1243	M32869	finn-b-IPF	Idiopathic pulmonary fibrosis || id:finn-b-IPF	exposure	Weighted median	16	0.491873	0.694371	0.478714	-0.869094	1.85284	1.63538	0.419331	6.3779
1244	M32869	finn-b-IPF	Idiopathic pulmonary fibrosis || id:finn-b-IPF	exposure	Inverse variance weighted	16	0.313209	0.498894	0.530131	-0.664624	1.29104	1.36781	0.514467	3.63657
1245	M32869	finn-b-IPF	Idiopathic pulmonary fibrosis || id:finn-b-IPF	exposure	Simple mode	16	0.407335	1.29154	0.756813	-2.12408	2.93875	1.50281	0.119542	18.8923
1246	M32869	finn-b-IPF	Idiopathic pulmonary fibrosis || id:finn-b-IPF	exposure	Weighted mode	16	0.643404	1.31276	0.631143	-1.9296	3.21641	1.90295	0.145206	24.9384
1247	M32910	finn-b-IPF	Idiopathic pulmonary fibrosis || id:finn-b-IPF	exposure	MR Egger	43	-0.0117452	1.07478	0.991334	-2.11832	2.09483	0.988323	0.120233	8.12409
1248	M32910	finn-b-IPF	Idiopathic pulmonary fibrosis || id:finn-b-IPF	exposure	Weighted median	43	-0.381805	0.87379	0.662146	-2.09443	1.33082	0.682628	0.12314	3.78416
1249	M32910	finn-b-IPF	Idiopathic pulmonary fibrosis || id:finn-b-IPF	exposure	Inverse variance weighted	43	-0.0394555	0.609376	0.948375	-1.23383	1.15492	0.961313	0.291175	3.17377
1250	M32910	finn-b-IPF	Idiopathic pulmonary fibrosis || id:finn-b-IPF	exposure	Simple mode	43	-0.971431	2.12009	0.649169	-5.12681	3.18395	0.378541	0.00593546	24.1419
1251	M32910	finn-b-IPF	Idiopathic pulmonary fibrosis || id:finn-b-IPF	exposure	Weighted mode	43	-0.399277	0.832253	0.633891	-2.03049	1.23194	0.670805	0.131271	3.42787
1252	M32980	finn-b-IPF	Idiopathic pulmonary fibrosis || id:finn-b-IPF	exposure	MR Egger	11	-0.713383	1.67112	0.67949	-3.98878	2.56201	0.489984	0.0185224	12.9618
1253	M32980	finn-b-IPF	Idiopathic pulmonary fibrosis || id:finn-b-IPF	exposure	Weighted median	11	-0.735514	0.921275	0.424659	-2.54121	1.07019	0.479259	0.0787707	2.91592
1254	M32980	finn-b-IPF	Idiopathic pulmonary fibrosis || id:finn-b-IPF	exposure	Inverse variance weighted	11	-0.823436	0.674746	0.222327	-2.14594	0.499066	0.438921	0.116958	1.64718
1255	M32980	finn-b-IPF	Idiopathic pulmonary fibrosis || id:finn-b-IPF	exposure	Simple mode	11	-0.916345	1.27126	0.487532	-3.40802	1.57533	0.399978	0.0331068	4.83232
1256	M32980	finn-b-IPF	Idiopathic pulmonary fibrosis || id:finn-b-IPF	exposure	Weighted mode	11	-0.760681	1.07942	0.497075	-2.87635	1.35499	0.467348	0.0563399	3.87672
1257	M33009	finn-b-IPF	Idiopathic pulmonary fibrosis || id:finn-b-IPF	exposure	MR Egger	6	0.138577	1.75715	0.940928	-3.30544	3.58259	1.14864	0.0366832	35.9666
1258	M33009	finn-b-IPF	Idiopathic pulmonary fibrosis || id:finn-b-IPF	exposure	Weighted median	6	0.377671	0.734831	0.607283	-1.0626	1.81794	1.45888	0.345557	6.15916
1259	M33009	finn-b-IPF	Idiopathic pulmonary fibrosis || id:finn-b-IPF	exposure	Inverse variance weighted	6	0.413488	0.580458	0.476249	-0.724209	1.55118	1.51208	0.484708	4.71705
1260	M33009	finn-b-IPF	Idiopathic pulmonary fibrosis || id:finn-b-IPF	exposure	Simple mode	6	0.557493	1.07305	0.625556	-1.54569	2.66068	1.74629	0.213165	14.306
1261	M33009	finn-b-IPF	Idiopathic pulmonary fibrosis || id:finn-b-IPF	exposure	Weighted mode	6	-0.180479	0.982445	0.861464	-2.10607	1.74511	0.83487	0.121715	5.72655
1262	M33009	finn-b-IPF	Idiopathic pulmonary fibrosis || id:finn-b-IPF	exposure	MR Egger	16	1.2762	1.67148	0.457829	-1.99989	4.55229	3.58301	0.13535	94.8498
1263	M33009	finn-b-IPF	Idiopathic pulmonary fibrosis || id:finn-b-IPF	exposure	Weighted median	16	-0.0737924	0.648079	0.909346	-1.34403	1.19644	0.928864	0.260793	3.30833
1264	M33009	finn-b-IPF	Idiopathic pulmonary fibrosis || id:finn-b-IPF	exposure	Inverse variance weighted	16	-0.291712	0.491732	0.553025	-1.25551	0.672082	0.746984	0.284932	1.95831
1265	M33009	finn-b-IPF	Idiopathic pulmonary fibrosis || id:finn-b-IPF	exposure	Simple mode	16	0.195801	1.14169	0.866122	-2.0419	2.4335	1.21628	0.129782	11.3988
1266	M33009	finn-b-IPF	Idiopathic pulmonary fibrosis || id:finn-b-IPF	exposure	Weighted mode	16	0.397696	1.08812	0.71985	-1.73503	2.53042	1.48839	0.176395	12.5588
1267	M33084	finn-b-IPF	Idiopathic pulmonary fibrosis || id:finn-b-IPF	exposure	MR Egger	11	-0.817737	0.797693	0.332066	-2.38122	0.745742	0.44143	0.0924382	2.108
1268	M33084	finn-b-IPF	Idiopathic pulmonary fibrosis || id:finn-b-IPF	exposure	Weighted median	11	-0.126143	0.515582	0.806719	-1.13668	0.884397	0.881489	0.320882	2.42152
1269	M33084	finn-b-IPF	Idiopathic pulmonary fibrosis || id:finn-b-IPF	exposure	Inverse variance weighted	11	0.259354	0.397355	0.513949	-0.519462	1.03817	1.29609	0.594841	2.82404
1270	M33084	finn-b-IPF	Idiopathic pulmonary fibrosis || id:finn-b-IPF	exposure	Simple mode	11	1.72743	0.914541	0.0882283	-0.0650653	3.51993	5.6262	0.937006	33.7822
1271	M33084	finn-b-IPF	Idiopathic pulmonary fibrosis || id:finn-b-IPF	exposure	Weighted mode	11	-0.170248	0.492208	0.736594	-1.13498	0.79448	0.843455	0.32143	2.21329
1272	M33131	finn-b-IPF	Idiopathic pulmonary fibrosis || id:finn-b-IPF	exposure	MR Egger	13	2.81907	2.26634	0.239396	-1.62295	7.26109	16.7612	0.197315	1423.8
1273	M33131	finn-b-IPF	Idiopathic pulmonary fibrosis || id:finn-b-IPF	exposure	Weighted median	13	0.294305	0.713049	0.679796	-1.10327	1.69188	1.34219	0.331784	5.42969
1274	M33131	finn-b-IPF	Idiopathic pulmonary fibrosis || id:finn-b-IPF	exposure	Inverse variance weighted	13	0.0133521	0.569011	0.981279	-1.10191	1.12861	1.01344	0.332236	3.09137
1275	M33131	finn-b-IPF	Idiopathic pulmonary fibrosis || id:finn-b-IPF	exposure	Simple mode	13	-1.92347	1.44803	0.208778	-4.7616	0.914672	0.1461	0.00855188	2.49596
1276	M33131	finn-b-IPF	Idiopathic pulmonary fibrosis || id:finn-b-IPF	exposure	Weighted mode	13	0.63026	1.09021	0.57388	-1.50655	2.76707	1.8781	0.221673	15.912
1277	M33132	finn-b-IPF	Idiopathic pulmonary fibrosis || id:finn-b-IPF	exposure	MR Egger	24	4.51738	2.62498	0.0993008	-0.627578	9.66234	91.5953	0.533883	15714.5
1278	M33132	finn-b-IPF	Idiopathic pulmonary fibrosis || id:finn-b-IPF	exposure	Weighted median	24	1.26519	1.6518	0.443709	-1.97234	4.50272	3.54376	0.139131	90.2621
1279	M33132	finn-b-IPF	Idiopathic pulmonary fibrosis || id:finn-b-IPF	exposure	Inverse variance weighted	24	1.26922	1.11642	0.255596	-0.918971	3.45741	3.55807	0.398929	31.7347
1280	M33132	finn-b-IPF	Idiopathic pulmonary fibrosis || id:finn-b-IPF	exposure	Simple mode	24	-1.33573	2.95773	0.655782	-7.13289	4.46142	0.262966	0.000798411	86.6108
1281	M33132	finn-b-IPF	Idiopathic pulmonary fibrosis || id:finn-b-IPF	exposure	Weighted mode	24	1.60467	1.81971	0.386995	-1.96197	5.17131	4.9762	0.140581	176.145
1282	M33137	finn-b-IPF	Idiopathic pulmonary fibrosis || id:finn-b-IPF	exposure	MR Egger	15	-0.758119	0.733984	0.320493	-2.19673	0.68049	0.468547	0.111166	1.97485
1283	M33137	finn-b-IPF	Idiopathic pulmonary fibrosis || id:finn-b-IPF	exposure	Weighted median	15	-0.153581	0.322908	0.634347	-0.786481	0.47932	0.857631	0.455445	1.61498
1284	M33137	finn-b-IPF	Idiopathic pulmonary fibrosis || id:finn-b-IPF	exposure	Inverse variance weighted	15	0.211719	0.238842	0.375381	-0.256411	0.679848	1.2358	0.773824	1.97358
1285	M33137	finn-b-IPF	Idiopathic pulmonary fibrosis || id:finn-b-IPF	exposure	Simple mode	15	1.26702	0.65365	0.0730095	-0.0141334	2.54817	3.55026	0.985966	12.7837
1286	M33137	finn-b-IPF	Idiopathic pulmonary fibrosis || id:finn-b-IPF	exposure	Weighted mode	15	-0.215105	0.378293	0.578622	-0.956559	0.526349	0.806457	0.384213	1.69274
1287	M33138	finn-b-IPF	Idiopathic pulmonary fibrosis || id:finn-b-IPF	exposure	MR Egger	14	-1.06906	0.678462	0.141075	-2.39885	0.260725	0.343331	0.0908226	1.29787
1288	M33138	finn-b-IPF	Idiopathic pulmonary fibrosis || id:finn-b-IPF	exposure	Weighted median	14	-0.540279	0.488392	0.268622	-1.49753	0.416968	0.582586	0.223683	1.51735
1289	M33138	finn-b-IPF	Idiopathic pulmonary fibrosis || id:finn-b-IPF	exposure	Inverse variance weighted	14	-0.440168	0.394206	0.264168	-1.21281	0.332476	0.643928	0.29736	1.39442
1290	M33138	finn-b-IPF	Idiopathic pulmonary fibrosis || id:finn-b-IPF	exposure	Simple mode	14	-0.727595	1.00738	0.482922	-2.70205	1.24686	0.483069	0.0670676	3.47942
1291	M33138	finn-b-IPF	Idiopathic pulmonary fibrosis || id:finn-b-IPF	exposure	Weighted mode	14	-0.593164	0.476584	0.235245	-1.52727	0.340941	0.552576	0.217128	1.40627
1292	M33140	finn-b-IPF	Idiopathic pulmonary fibrosis || id:finn-b-IPF	exposure	MR Egger	12	2.93354	2.17424	0.207019	-1.32796	7.19504	18.794	0.265016	1332.81
1293	M33140	finn-b-IPF	Idiopathic pulmonary fibrosis || id:finn-b-IPF	exposure	Weighted median	12	1.39445	0.978058	0.153944	-0.522539	3.31145	4.03277	0.593013	27.4248
1294	M33140	finn-b-IPF	Idiopathic pulmonary fibrosis || id:finn-b-IPF	exposure	Inverse variance weighted	12	1.6352	0.762918	0.032085	0.139881	3.13052	5.13049	1.15014	22.8859
1295	M33140	finn-b-IPF	Idiopathic pulmonary fibrosis || id:finn-b-IPF	exposure	Simple mode	12	1.13405	1.52245	0.471956	-1.84994	4.11804	3.10821	0.157246	61.4388
1296	M33140	finn-b-IPF	Idiopathic pulmonary fibrosis || id:finn-b-IPF	exposure	Weighted mode	12	1.13405	1.46996	0.456676	-1.74708	4.01518	3.10821	0.174282	55.4332
1297	M33144	finn-b-IPF	Idiopathic pulmonary fibrosis || id:finn-b-IPF	exposure	MR Egger	7	-0.411513	0.766543	0.614394	-1.91394	1.09091	0.662647	0.147498	2.97699
1298	M33144	finn-b-IPF	Idiopathic pulmonary fibrosis || id:finn-b-IPF	exposure	Weighted median	7	-0.540134	0.393883	0.170279	-1.31214	0.231876	0.58267	0.269242	1.26096
1299	M33144	finn-b-IPF	Idiopathic pulmonary fibrosis || id:finn-b-IPF	exposure	Inverse variance weighted	7	-0.189232	0.333501	0.570436	-0.842895	0.464431	0.827595	0.430463	1.59111
1300	M33144	finn-b-IPF	Idiopathic pulmonary fibrosis || id:finn-b-IPF	exposure	Simple mode	7	-0.483474	0.726328	0.530383	-1.90708	0.94013	0.616637	0.148514	2.56031
1301	M33144	finn-b-IPF	Idiopathic pulmonary fibrosis || id:finn-b-IPF	exposure	Weighted mode	7	-0.540313	0.416715	0.242399	-1.35707	0.276448	0.582566	0.257413	1.31844
1302	M33150	finn-b-IPF	Idiopathic pulmonary fibrosis || id:finn-b-IPF	exposure	MR Egger	10	0.216927	0.360953	0.564486	-0.490541	0.924394	1.24225	0.612295	2.52034
1303	M33150	finn-b-IPF	Idiopathic pulmonary fibrosis || id:finn-b-IPF	exposure	Weighted median	10	0.299843	0.222628	0.178034	-0.136508	0.736194	1.34965	0.872399	2.08797
1304	M33150	finn-b-IPF	Idiopathic pulmonary fibrosis || id:finn-b-IPF	exposure	Inverse variance weighted	10	0.468047	0.256363	0.0678926	-0.0344246	0.970518	1.59687	0.966161	2.63931
1305	M33150	finn-b-IPF	Idiopathic pulmonary fibrosis || id:finn-b-IPF	exposure	Simple mode	10	0.833522	0.542097	0.158529	-0.228988	1.89603	2.30141	0.795338	6.65941
1306	M33150	finn-b-IPF	Idiopathic pulmonary fibrosis || id:finn-b-IPF	exposure	Weighted mode	10	0.316937	0.192295	0.133719	-0.0599621	0.693835	1.37292	0.9418	2.00138
1307	M33163	finn-b-IPF	Idiopathic pulmonary fibrosis || id:finn-b-IPF	exposure	MR Egger	19	-0.353749	1.84456	0.850187	-3.96909	3.2616	0.702051	0.0188905	26.0912
1308	M33163	finn-b-IPF	Idiopathic pulmonary fibrosis || id:finn-b-IPF	exposure	Weighted median	19	1.22512	1.03324	0.235735	-0.800019	3.25026	3.40458	0.44932	25.7972
1309	M33163	finn-b-IPF	Idiopathic pulmonary fibrosis || id:finn-b-IPF	exposure	Inverse variance weighted	19	0.0313882	0.710774	0.964776	-1.36173	1.4245	1.03189	0.256218	4.1558
1310	M33163	finn-b-IPF	Idiopathic pulmonary fibrosis || id:finn-b-IPF	exposure	Simple mode	19	1.4562	1.9298	0.460255	-2.3262	5.23861	4.28965	0.0976663	188.407
1311	M33163	finn-b-IPF	Idiopathic pulmonary fibrosis || id:finn-b-IPF	exposure	Weighted mode	19	2.00136	1.80312	0.281631	-1.53275	5.53547	7.39914	0.215942	253.528
1312	M33165	finn-b-IPF	Idiopathic pulmonary fibrosis || id:finn-b-IPF	exposure	MR Egger	12	0.312585	1.07229	0.776618	-1.78911	2.41428	1.36695	0.167108	11.1817
1313	M33165	finn-b-IPF	Idiopathic pulmonary fibrosis || id:finn-b-IPF	exposure	Weighted median	12	-0.35572	0.696483	0.609535	-1.72083	1.00939	0.700669	0.178918	2.74392
1314	M33165	finn-b-IPF	Idiopathic pulmonary fibrosis || id:finn-b-IPF	exposure	Inverse variance weighted	12	0.269704	0.490441	0.582373	-0.69156	1.23097	1.30958	0.500794	3.42454
1315	M33165	finn-b-IPF	Idiopathic pulmonary fibrosis || id:finn-b-IPF	exposure	Simple mode	12	-0.37558	0.991621	0.712079	-2.31916	1.568	0.686891	0.0983565	4.79703
1316	M33165	finn-b-IPF	Idiopathic pulmonary fibrosis || id:finn-b-IPF	exposure	Weighted mode	12	-0.405772	0.746844	0.59775	-1.86959	1.05804	0.666462	0.154187	2.88073
1317	M33173	finn-b-IPF	Idiopathic pulmonary fibrosis || id:finn-b-IPF	exposure	MR Egger	47	-0.0630821	0.0453291	0.17087	-0.151927	0.0257629	0.938866	0.859051	1.0261
1318	M33173	finn-b-IPF	Idiopathic pulmonary fibrosis || id:finn-b-IPF	exposure	Weighted median	47	-0.0165024	0.0383498	0.666968	-0.0916679	0.0586632	0.983633	0.912408	1.06042
1319	M33173	finn-b-IPF	Idiopathic pulmonary fibrosis || id:finn-b-IPF	exposure	Inverse variance weighted	47	-0.0113632	0.0225977	0.615073	-0.0556548	0.0329284	0.988701	0.945866	1.03348
1320	M33173	finn-b-IPF	Idiopathic pulmonary fibrosis || id:finn-b-IPF	exposure	Simple mode	47	0.00617513	0.0642106	0.923803	-0.119678	0.132028	1.00619	0.887206	1.14114
1321	M33173	finn-b-IPF	Idiopathic pulmonary fibrosis || id:finn-b-IPF	exposure	Weighted mode	47	-0.0153347	0.033943	0.653552	-0.081863	0.0511936	0.984782	0.921398	1.05253
1322	M33178	finn-b-IPF	Idiopathic pulmonary fibrosis || id:finn-b-IPF	exposure	MR Egger	299	-0.0408546	0.0656317	0.534102	-0.169493	0.0877836	0.959969	0.844093	1.09175
1323	M33178	finn-b-IPF	Idiopathic pulmonary fibrosis || id:finn-b-IPF	exposure	Weighted median	299	-0.0449461	0.0341415	0.188018	-0.111863	0.0219713	0.956049	0.894166	1.02221
1324	M33178	finn-b-IPF	Idiopathic pulmonary fibrosis || id:finn-b-IPF	exposure	Inverse variance weighted	299	-0.00767151	0.0224112	0.73212	-0.0515975	0.0362545	0.992358	0.949711	1.03692
1325	M33178	finn-b-IPF	Idiopathic pulmonary fibrosis || id:finn-b-IPF	exposure	Simple mode	299	-0.0961681	0.0854029	0.261049	-0.263558	0.0712216	0.908311	0.768313	1.07382
1326	M33178	finn-b-IPF	Idiopathic pulmonary fibrosis || id:finn-b-IPF	exposure	Weighted mode	299	-0.0961681	0.0601181	0.110735	-0.214	0.0216633	0.908311	0.807349	1.0219
1327	M33188	finn-b-IPF	Idiopathic pulmonary fibrosis || id:finn-b-IPF	exposure	MR Egger	3	-0.752986	0.787597	0.5143	-2.29668	0.790704	0.470958	0.100593	2.20495
1328	M33188	finn-b-IPF	Idiopathic pulmonary fibrosis || id:finn-b-IPF	exposure	Weighted median	3	-0.335373	0.512349	0.512739	-1.33958	0.668832	0.715071	0.261956	1.95196
1329	M33188	finn-b-IPF	Idiopathic pulmonary fibrosis || id:finn-b-IPF	exposure	Inverse variance weighted	3	-0.0629659	0.448057	0.888241	-0.941158	0.815227	0.938976	0.390176	2.25969
1330	M33188	finn-b-IPF	Idiopathic pulmonary fibrosis || id:finn-b-IPF	exposure	Simple mode	3	-0.318943	0.795618	0.727284	-1.87835	1.24047	0.726917	0.152842	3.45723
1331	M33188	finn-b-IPF	Idiopathic pulmonary fibrosis || id:finn-b-IPF	exposure	Weighted mode	3	-0.374433	0.576887	0.58288	-1.50513	0.756267	0.687679	0.221988	2.13031
1332	M33190	finn-b-IPF	Idiopathic pulmonary fibrosis || id:finn-b-IPF	exposure	MR Egger	20	0.504726	0.477046	0.304038	-0.430285	1.43974	1.65653	0.650324	4.21959
1333	M33190	finn-b-IPF	Idiopathic pulmonary fibrosis || id:finn-b-IPF	exposure	Weighted median	20	0.173	0.260835	0.507166	-0.338236	0.684236	1.18887	0.713027	1.98226
1334	M33190	finn-b-IPF	Idiopathic pulmonary fibrosis || id:finn-b-IPF	exposure	Inverse variance weighted	20	0.211187	0.189491	0.265067	-0.160216	0.58259	1.23514	0.85196	1.79067
1335	M33190	finn-b-IPF	Idiopathic pulmonary fibrosis || id:finn-b-IPF	exposure	Simple mode	20	0.0932337	0.413998	0.824225	-0.718202	0.904669	1.09772	0.487628	2.47111
1336	M33190	finn-b-IPF	Idiopathic pulmonary fibrosis || id:finn-b-IPF	exposure	Weighted mode	20	0.230914	0.316121	0.47402	-0.388684	0.850512	1.25975	0.677949	2.34084
1337	M33192	finn-b-IPF	Idiopathic pulmonary fibrosis || id:finn-b-IPF	exposure	MR Egger	12	0.525687	0.636459	0.428095	-0.721773	1.77315	1.69162	0.48589	5.88936
1338	M33192	finn-b-IPF	Idiopathic pulmonary fibrosis || id:finn-b-IPF	exposure	Weighted median	12	0.434555	0.365043	0.233881	-0.280929	1.15004	1.54428	0.755082	3.15832
1339	M33192	finn-b-IPF	Idiopathic pulmonary fibrosis || id:finn-b-IPF	exposure	Inverse variance weighted	12	0.311837	0.257499	0.225887	-0.19286	0.816534	1.36593	0.824597	2.26264
1340	M33192	finn-b-IPF	Idiopathic pulmonary fibrosis || id:finn-b-IPF	exposure	Simple mode	12	0.250875	0.556247	0.660741	-0.839369	1.34112	1.28515	0.431983	3.82332
1341	M33192	finn-b-IPF	Idiopathic pulmonary fibrosis || id:finn-b-IPF	exposure	Weighted mode	12	0.537143	0.460952	0.268549	-0.366323	1.44061	1.71111	0.693279	4.22327
1342	M33194	finn-b-IPF	Idiopathic pulmonary fibrosis || id:finn-b-IPF	exposure	MR Egger	13	-0.308737	0.494081	0.5448	-1.27714	0.659663	0.734374	0.278835	1.93414
1343	M33194	finn-b-IPF	Idiopathic pulmonary fibrosis || id:finn-b-IPF	exposure	Weighted median	13	-0.105707	0.276763	0.702507	-0.648163	0.43675	0.899689	0.523006	1.54767
1344	M33194	finn-b-IPF	Idiopathic pulmonary fibrosis || id:finn-b-IPF	exposure	Inverse variance weighted	13	-0.0742672	0.20119	0.712024	-0.468599	0.320065	0.928424	0.625878	1.37722
1345	M33194	finn-b-IPF	Idiopathic pulmonary fibrosis || id:finn-b-IPF	exposure	Simple mode	13	-0.0664364	0.494838	0.895423	-1.03632	0.903445	0.935722	0.354758	2.46809
1346	M33194	finn-b-IPF	Idiopathic pulmonary fibrosis || id:finn-b-IPF	exposure	Weighted mode	13	-0.175396	0.415838	0.680636	-0.990438	0.639646	0.839125	0.371414	1.89581
1347	M33195	finn-b-IPF	Idiopathic pulmonary fibrosis || id:finn-b-IPF	exposure	MR Egger	7	-0.350048	0.507671	0.521185	-1.34508	0.644988	0.704654	0.260518	1.90596
1348	M33195	finn-b-IPF	Idiopathic pulmonary fibrosis || id:finn-b-IPF	exposure	Weighted median	7	-0.138704	0.329316	0.673617	-0.784164	0.506756	0.870485	0.456501	1.6599
1349	M33195	finn-b-IPF	Idiopathic pulmonary fibrosis || id:finn-b-IPF	exposure	Inverse variance weighted	7	-0.0868724	0.282697	0.758616	-0.640958	0.467213	0.916794	0.526787	1.59554
1350	M33195	finn-b-IPF	Idiopathic pulmonary fibrosis || id:finn-b-IPF	exposure	Simple mode	7	0.555834	0.666067	0.435957	-0.749656	1.86132	1.74339	0.472529	6.43225
1351	M33195	finn-b-IPF	Idiopathic pulmonary fibrosis || id:finn-b-IPF	exposure	Weighted mode	7	-0.407006	0.344746	0.28244	-1.08271	0.268696	0.66564	0.338677	1.30826
1352	M33197	finn-b-IPF	Idiopathic pulmonary fibrosis || id:finn-b-IPF	exposure	MR Egger	9	-0.559285	0.355822	0.159989	-1.2567	0.138126	0.571617	0.284593	1.14812
1353	M33197	finn-b-IPF	Idiopathic pulmonary fibrosis || id:finn-b-IPF	exposure	Weighted median	9	-0.172987	0.343077	0.614104	-0.845418	0.499443	0.841148	0.429378	1.6478
1354	M33197	finn-b-IPF	Idiopathic pulmonary fibrosis || id:finn-b-IPF	exposure	Inverse variance weighted	9	-0.398108	0.22209	0.0730453	-0.833405	0.0371896	0.67159	0.434567	1.03789
1355	M33197	finn-b-IPF	Idiopathic pulmonary fibrosis || id:finn-b-IPF	exposure	Simple mode	9	0.209118	0.590627	0.732444	-0.948511	1.36675	1.23259	0.387317	3.92257
1356	M33197	finn-b-IPF	Idiopathic pulmonary fibrosis || id:finn-b-IPF	exposure	Weighted mode	9	0.255684	0.45136	0.586608	-0.628983	1.14035	1.29134	0.533134	3.12786
1357	M33203	finn-b-IPF	Idiopathic pulmonary fibrosis || id:finn-b-IPF	exposure	MR Egger	14	0.238715	0.327729	0.480348	-0.403633	0.881063	1.26962	0.667889	2.41346
1358	M33203	finn-b-IPF	Idiopathic pulmonary fibrosis || id:finn-b-IPF	exposure	Weighted median	14	-0.0738671	0.223941	0.741513	-0.512792	0.365058	0.928795	0.598821	1.4406
1359	M33203	finn-b-IPF	Idiopathic pulmonary fibrosis || id:finn-b-IPF	exposure	Inverse variance weighted	14	-0.0512845	0.163329	0.753524	-0.371409	0.26884	0.950008	0.689762	1.30845
1360	M33203	finn-b-IPF	Idiopathic pulmonary fibrosis || id:finn-b-IPF	exposure	Simple mode	14	-0.0463516	0.332221	0.891177	-0.697505	0.604802	0.954706	0.497826	1.83089
1361	M33203	finn-b-IPF	Idiopathic pulmonary fibrosis || id:finn-b-IPF	exposure	Weighted mode	14	-0.0380712	0.257769	0.88485	-0.543298	0.467156	0.962644	0.580829	1.59545
1362	M33204	finn-b-IPF	Idiopathic pulmonary fibrosis || id:finn-b-IPF	exposure	MR Egger	12	3.94991	2.55971	0.153834	-1.06712	8.96695	51.931	0.343999	7839.62
1363	M33204	finn-b-IPF	Idiopathic pulmonary fibrosis || id:finn-b-IPF	exposure	Weighted median	12	0.85636	1.11054	0.440635	-1.3203	3.03302	2.35457	0.267056	20.7597
1364	M33204	finn-b-IPF	Idiopathic pulmonary fibrosis || id:finn-b-IPF	exposure	Inverse variance weighted	12	0.981605	0.978081	0.31557	-0.935433	2.89864	2.66874	0.392416	18.1495
1365	M33204	finn-b-IPF	Idiopathic pulmonary fibrosis || id:finn-b-IPF	exposure	Simple mode	12	0.0888401	1.56772	0.955826	-2.98389	3.16157	1.09291	0.0505954	23.6077
1366	M33204	finn-b-IPF	Idiopathic pulmonary fibrosis || id:finn-b-IPF	exposure	Weighted mode	12	0.605874	1.42895	0.67974	-2.19488	3.40662	1.83285	0.111372	30.1632
1367	M33221	finn-b-IPF	Idiopathic pulmonary fibrosis || id:finn-b-IPF	exposure	MR Egger	16	-0.66841	1.03077	0.527182	-2.68871	1.35189	0.512523	0.0679684	3.86473
1368	M33221	finn-b-IPF	Idiopathic pulmonary fibrosis || id:finn-b-IPF	exposure	Weighted median	16	0.267851	0.661896	0.685718	-1.02946	1.56517	1.30715	0.357198	4.78347
1369	M33221	finn-b-IPF	Idiopathic pulmonary fibrosis || id:finn-b-IPF	exposure	Inverse variance weighted	16	-0.118534	0.480971	0.805335	-1.06124	0.824169	0.888221	0.346027	2.27999
1370	M33221	finn-b-IPF	Idiopathic pulmonary fibrosis || id:finn-b-IPF	exposure	Simple mode	16	0.225721	1.13115	0.844513	-1.99133	2.44278	1.25323	0.136513	11.5049
1371	M33221	finn-b-IPF	Idiopathic pulmonary fibrosis || id:finn-b-IPF	exposure	Weighted mode	16	0.311284	0.936995	0.744324	-1.52523	2.14779	1.36518	0.217572	8.56595
1372	M33228	finn-b-IPF	Idiopathic pulmonary fibrosis || id:finn-b-IPF	exposure	MR Egger	21	-0.864297	1.06719	0.428034	-2.95598	1.22739	0.421348	0.0520276	3.4123
1373	M33228	finn-b-IPF	Idiopathic pulmonary fibrosis || id:finn-b-IPF	exposure	Weighted median	21	-0.309156	0.755938	0.682561	-1.79079	1.17248	0.734066	0.166828	3.23
1374	M33228	finn-b-IPF	Idiopathic pulmonary fibrosis || id:finn-b-IPF	exposure	Inverse variance weighted	21	-0.188043	0.559185	0.736659	-1.28405	0.90796	0.828579	0.276914	2.47926
1375	M33228	finn-b-IPF	Idiopathic pulmonary fibrosis || id:finn-b-IPF	exposure	Simple mode	21	2.7972	1.81813	0.139597	-0.766335	6.36074	16.3987	0.464713	578.672
1376	M33228	finn-b-IPF	Idiopathic pulmonary fibrosis || id:finn-b-IPF	exposure	Weighted mode	21	-0.310139	0.791238	0.699228	-1.86097	1.24069	0.733345	0.155522	3.45799
1377	M33230	finn-b-IPF	Idiopathic pulmonary fibrosis || id:finn-b-IPF	exposure	MR Egger	14	1.85285	2.7073	0.506731	-3.45346	7.15917	6.378	0.0316359	1285.85
1378	M33230	finn-b-IPF	Idiopathic pulmonary fibrosis || id:finn-b-IPF	exposure	Weighted median	14	1.17939	1.12328	0.293739	-1.02224	3.38102	3.2524	0.359789	29.4009
1379	M33230	finn-b-IPF	Idiopathic pulmonary fibrosis || id:finn-b-IPF	exposure	Inverse variance weighted	14	1.13557	0.837572	0.175165	-0.506067	2.77721	3.11296	0.602862	16.0742
1380	M33230	finn-b-IPF	Idiopathic pulmonary fibrosis || id:finn-b-IPF	exposure	Simple mode	14	1.20834	1.8167	0.517594	-2.35238	4.76906	3.34792	0.095142	117.809
1381	M33230	finn-b-IPF	Idiopathic pulmonary fibrosis || id:finn-b-IPF	exposure	Weighted mode	14	1.11178	1.73453	0.53268	-2.2879	4.51147	3.03977	0.101479	91.0553
1382	M33250	finn-b-IPF	Idiopathic pulmonary fibrosis || id:finn-b-IPF	exposure	MR Egger	17	-0.71651	0.55738	0.218112	-1.80897	0.375955	0.488454	0.163822	1.45638
1383	M33250	finn-b-IPF	Idiopathic pulmonary fibrosis || id:finn-b-IPF	exposure	Weighted median	17	0.0863209	0.412503	0.834244	-0.722184	0.894826	1.09016	0.48569	2.44691
1384	M33250	finn-b-IPF	Idiopathic pulmonary fibrosis || id:finn-b-IPF	exposure	Inverse variance weighted	17	-0.205621	0.320889	0.521662	-0.834564	0.423322	0.814141	0.434064	1.52703
1385	M33250	finn-b-IPF	Idiopathic pulmonary fibrosis || id:finn-b-IPF	exposure	Simple mode	17	0.0731115	0.684368	0.916251	-1.26825	1.41447	1.07585	0.281324	4.11431
1386	M33250	finn-b-IPF	Idiopathic pulmonary fibrosis || id:finn-b-IPF	exposure	Weighted mode	17	0.156177	0.411345	0.70918	-0.650059	0.962412	1.16903	0.522015	2.618
1387	M33353	finn-b-IPF	Idiopathic pulmonary fibrosis || id:finn-b-IPF	exposure	MR Egger	19	-0.304128	0.330154	0.369851	-0.95123	0.342975	0.737767	0.386265	1.40913
1388	M33353	finn-b-IPF	Idiopathic pulmonary fibrosis || id:finn-b-IPF	exposure	Weighted median	19	-0.0285448	0.254851	0.910819	-0.528053	0.470963	0.971859	0.589752	1.60154
1389	M33353	finn-b-IPF	Idiopathic pulmonary fibrosis || id:finn-b-IPF	exposure	Inverse variance weighted	19	-0.0940349	0.172197	0.585004	-0.431541	0.243471	0.910251	0.649508	1.27567
1390	M33353	finn-b-IPF	Idiopathic pulmonary fibrosis || id:finn-b-IPF	exposure	Simple mode	19	0.0304824	0.401606	0.940335	-0.756666	0.817631	1.03095	0.469228	2.26513
1391	M33353	finn-b-IPF	Idiopathic pulmonary fibrosis || id:finn-b-IPF	exposure	Weighted mode	19	-0.0424551	0.234072	0.858099	-0.501235	0.416325	0.958434	0.605782	1.51638
1392	M33359	finn-b-IPF	Idiopathic pulmonary fibrosis || id:finn-b-IPF	exposure	MR Egger	9	0.0358771	0.310972	0.911391	-0.573628	0.645382	1.03653	0.563478	1.90672
1393	M33359	finn-b-IPF	Idiopathic pulmonary fibrosis || id:finn-b-IPF	exposure	Weighted median	9	-0.0966597	0.283939	0.733537	-0.65318	0.45986	0.907865	0.520388	1.58385
1394	M33359	finn-b-IPF	Idiopathic pulmonary fibrosis || id:finn-b-IPF	exposure	Inverse variance weighted	9	0.265595	0.214721	0.216112	-0.155257	0.686448	1.30421	0.856195	1.98665
1395	M33359	finn-b-IPF	Idiopathic pulmonary fibrosis || id:finn-b-IPF	exposure	Simple mode	9	0.538503	0.562706	0.366595	-0.5644	1.64141	1.71344	0.568701	5.16243
1396	M33359	finn-b-IPF	Idiopathic pulmonary fibrosis || id:finn-b-IPF	exposure	Weighted mode	9	-0.0952421	0.299443	0.75858	-0.68215	0.491665	0.909153	0.505529	1.63504
1397	M33363	finn-b-IPF	Idiopathic pulmonary fibrosis || id:finn-b-IPF	exposure	MR Egger	8	-0.358757	1.59407	0.829404	-3.48314	2.76562	0.698544	0.0307109	15.889
1398	M33363	finn-b-IPF	Idiopathic pulmonary fibrosis || id:finn-b-IPF	exposure	Weighted median	8	0.488174	0.977444	0.61747	-1.42762	2.40396	1.62934	0.23988	11.067
1399	M33363	finn-b-IPF	Idiopathic pulmonary fibrosis || id:finn-b-IPF	exposure	Inverse variance weighted	8	0.101775	0.728663	0.888918	-1.3264	1.52995	1.10713	0.26543	4.61796
1400	M33363	finn-b-IPF	Idiopathic pulmonary fibrosis || id:finn-b-IPF	exposure	Simple mode	8	0.755688	1.46513	0.621892	-2.11596	3.62733	2.12908	0.120518	37.6124
1401	M33363	finn-b-IPF	Idiopathic pulmonary fibrosis || id:finn-b-IPF	exposure	Weighted mode	8	0.653122	1.24007	0.614687	-1.77742	3.08366	1.92153	0.169074	21.8382
1402	M33364	finn-b-IPF	Idiopathic pulmonary fibrosis || id:finn-b-IPF	exposure	MR Egger	10	2.0534	2.03962	0.343529	-1.94425	6.05105	7.79434	0.143094	424.558
1403	M33364	finn-b-IPF	Idiopathic pulmonary fibrosis || id:finn-b-IPF	exposure	Weighted median	10	0.454065	1.08991	0.676965	-1.68215	2.59028	1.5747	0.185973	13.3335
1404	M33364	finn-b-IPF	Idiopathic pulmonary fibrosis || id:finn-b-IPF	exposure	Inverse variance weighted	10	-0.686146	0.848214	0.418556	-2.34865	0.976354	0.503513	0.0954984	2.65476
1405	M33364	finn-b-IPF	Idiopathic pulmonary fibrosis || id:finn-b-IPF	exposure	Simple mode	10	0.256672	1.87947	0.89438	-3.42709	3.94044	1.29262	0.0324812	51.4411
1406	M33364	finn-b-IPF	Idiopathic pulmonary fibrosis || id:finn-b-IPF	exposure	Weighted mode	10	0.631683	1.43505	0.670187	-2.18102	3.44438	1.88077	0.112927	31.324
1407	M33380	finn-b-IPF	Idiopathic pulmonary fibrosis || id:finn-b-IPF	exposure	MR Egger	37	0.622402	2.38606	0.795738	-4.05428	5.29909	1.8634	0.0173479	200.154
1408	M33380	finn-b-IPF	Idiopathic pulmonary fibrosis || id:finn-b-IPF	exposure	Weighted median	37	1.04759	1.31537	0.425785	-1.53053	3.62572	2.85078	0.216421	37.5516
1409	M33380	finn-b-IPF	Idiopathic pulmonary fibrosis || id:finn-b-IPF	exposure	Inverse variance weighted	37	1.03143	0.889381	0.246162	-0.711753	2.77462	2.80509	0.490783	16.0326
1410	M33380	finn-b-IPF	Idiopathic pulmonary fibrosis || id:finn-b-IPF	exposure	Simple mode	37	1.28021	2.4493	0.604396	-3.52042	6.08084	3.5974	0.029587	437.397
1411	M33380	finn-b-IPF	Idiopathic pulmonary fibrosis || id:finn-b-IPF	exposure	Weighted mode	37	1.14183	2.24208	0.613669	-3.25265	5.53631	3.13249	0.0386716	253.74
1412	M33384	finn-b-IPF	Idiopathic pulmonary fibrosis || id:finn-b-IPF	exposure	MR Egger	12	0.082967	0.179476	0.65378	-0.268806	0.43474	1.08651	0.764291	1.54456
1413	M33384	finn-b-IPF	Idiopathic pulmonary fibrosis || id:finn-b-IPF	exposure	Weighted median	12	-0.00192804	0.155223	0.99009	-0.306166	0.30231	0.998074	0.736264	1.35298
1414	M33384	finn-b-IPF	Idiopathic pulmonary fibrosis || id:finn-b-IPF	exposure	Inverse variance weighted	12	0.0413244	0.101887	0.685044	-0.158375	0.241023	1.04219	0.85353	1.27255
1415	M33384	finn-b-IPF	Idiopathic pulmonary fibrosis || id:finn-b-IPF	exposure	Simple mode	12	0.127705	0.260903	0.634121	-0.383665	0.639076	1.13622	0.68136	1.89473
1416	M33384	finn-b-IPF	Idiopathic pulmonary fibrosis || id:finn-b-IPF	exposure	Weighted mode	12	-0.0896787	0.241753	0.717718	-0.563514	0.384157	0.914225	0.569205	1.46838
1417	M33389	finn-b-IPF	Idiopathic pulmonary fibrosis || id:finn-b-IPF	exposure	MR Egger	51	5.7741	4.40802	0.196335	-2.86561	14.4138	321.855	0.0569483	1.81903e+06
1418	M33389	finn-b-IPF	Idiopathic pulmonary fibrosis || id:finn-b-IPF	exposure	Weighted median	51	-1.05433	1.14539	0.35731	-3.2993	1.19063	0.348425	0.0369091	3.28915
1419	M33389	finn-b-IPF	Idiopathic pulmonary fibrosis || id:finn-b-IPF	exposure	Inverse variance weighted	51	-0.503566	0.841911	0.549758	-2.15371	1.14658	0.604372	0.116053	3.14741
1420	M33389	finn-b-IPF	Idiopathic pulmonary fibrosis || id:finn-b-IPF	exposure	Simple mode	51	-3.76873	3.21993	0.247372	-10.0798	2.54233	0.0230813	4.19e-05	12.7092
1421	M33389	finn-b-IPF	Idiopathic pulmonary fibrosis || id:finn-b-IPF	exposure	Weighted mode	51	-3.55452	3.12779	0.261193	-9.685	2.57595	0.028595	6.22e-05	13.1438
1422	M33390	finn-b-IPF	Idiopathic pulmonary fibrosis || id:finn-b-IPF	exposure	MR Egger	15	0.144951	0.633808	0.822662	-1.09731	1.38721	1.15598	0.333767	4.00368
1423	M33390	finn-b-IPF	Idiopathic pulmonary fibrosis || id:finn-b-IPF	exposure	Weighted median	15	-0.31411	0.348754	0.367768	-0.997668	0.369449	0.730439	0.368738	1.44694
1424	M33390	finn-b-IPF	Idiopathic pulmonary fibrosis || id:finn-b-IPF	exposure	Inverse variance weighted	15	-0.363394	0.332489	0.274416	-1.01507	0.288285	0.695313	0.362376	1.33414
1425	M33390	finn-b-IPF	Idiopathic pulmonary fibrosis || id:finn-b-IPF	exposure	Simple mode	15	-0.164598	0.535644	0.763146	-1.21446	0.885265	0.848235	0.29687	2.42363
1426	M33390	finn-b-IPF	Idiopathic pulmonary fibrosis || id:finn-b-IPF	exposure	Weighted mode	15	-0.237079	0.437305	0.59625	-1.0942	0.62004	0.788929	0.334808	1.859
1427	M33391	finn-b-IPF	Idiopathic pulmonary fibrosis || id:finn-b-IPF	exposure	MR Egger	15	0.363603	0.146784	0.0277596	0.0759064	0.651299	1.4385	1.07886	1.91803
1428	M33391	finn-b-IPF	Idiopathic pulmonary fibrosis || id:finn-b-IPF	exposure	Weighted median	15	0.14393	0.123708	0.244642	-0.0985383	0.386398	1.1548	0.906161	1.47167
1429	M33391	finn-b-IPF	Idiopathic pulmonary fibrosis || id:finn-b-IPF	exposure	Inverse variance weighted	15	0.108542	0.0963932	0.260152	-0.0803888	0.297473	1.11465	0.922757	1.34645
1430	M33391	finn-b-IPF	Idiopathic pulmonary fibrosis || id:finn-b-IPF	exposure	Simple mode	15	0.128142	0.164234	0.448241	-0.193757	0.450041	1.13671	0.823858	1.56838
1431	M33391	finn-b-IPF	Idiopathic pulmonary fibrosis || id:finn-b-IPF	exposure	Weighted mode	15	0.148476	0.126064	0.258516	-0.0986089	0.395561	1.16006	0.906097	1.48522
1432	M33408	finn-b-IPF	Idiopathic pulmonary fibrosis || id:finn-b-IPF	exposure	MR Egger	14	0.480022	0.642739	0.469543	-0.779748	1.73979	1.61611	0.458522	5.69615
1433	M33408	finn-b-IPF	Idiopathic pulmonary fibrosis || id:finn-b-IPF	exposure	Weighted median	14	0.148144	0.423087	0.726226	-0.681106	0.977394	1.15968	0.506057	2.65752
1434	M33408	finn-b-IPF	Idiopathic pulmonary fibrosis || id:finn-b-IPF	exposure	Inverse variance weighted	14	0.245383	0.324079	0.448948	-0.389812	0.880579	1.27811	0.677184	2.4123
1435	M33408	finn-b-IPF	Idiopathic pulmonary fibrosis || id:finn-b-IPF	exposure	Simple mode	14	0.0192902	0.668928	0.977432	-1.29181	1.33039	1.01948	0.274773	3.78252
1436	M33408	finn-b-IPF	Idiopathic pulmonary fibrosis || id:finn-b-IPF	exposure	Weighted mode	14	0.225852	0.56222	0.69442	-0.876099	1.3278	1.25339	0.416404	3.77274
1437	M33415	finn-b-IPF	Idiopathic pulmonary fibrosis || id:finn-b-IPF	exposure	MR Egger	17	-0.220541	0.380533	0.570815	-0.966385	0.525303	0.802085	0.380456	1.69097
1438	M33415	finn-b-IPF	Idiopathic pulmonary fibrosis || id:finn-b-IPF	exposure	Weighted median	17	-0.172309	0.310368	0.578774	-0.78063	0.436012	0.841719	0.458117	1.54653
1439	M33415	finn-b-IPF	Idiopathic pulmonary fibrosis || id:finn-b-IPF	exposure	Inverse variance weighted	17	-0.355209	0.244688	0.14659	-0.834797	0.124379	0.701027	0.433962	1.13244
1440	M33415	finn-b-IPF	Idiopathic pulmonary fibrosis || id:finn-b-IPF	exposure	Simple mode	17	0.0370395	0.584501	0.950257	-1.10858	1.18266	1.03773	0.330027	3.26305
1441	M33415	finn-b-IPF	Idiopathic pulmonary fibrosis || id:finn-b-IPF	exposure	Weighted mode	17	-0.153733	0.301741	0.617366	-0.745146	0.43768	0.857501	0.474665	1.54911
1442	M33420	finn-b-IPF	Idiopathic pulmonary fibrosis || id:finn-b-IPF	exposure	MR Egger	13	-0.287667	0.799544	0.725817	-1.85477	1.27944	0.750011	0.156488	3.59462
1443	M33420	finn-b-IPF	Idiopathic pulmonary fibrosis || id:finn-b-IPF	exposure	Weighted median	13	-0.360482	0.518887	0.48723	-1.3775	0.656537	0.69734	0.252208	1.9281
1444	M33420	finn-b-IPF	Idiopathic pulmonary fibrosis || id:finn-b-IPF	exposure	Inverse variance weighted	13	-0.543238	0.380547	0.153431	-1.28911	0.202635	0.580865	0.275516	1.22463
1445	M33420	finn-b-IPF	Idiopathic pulmonary fibrosis || id:finn-b-IPF	exposure	Simple mode	13	-0.296211	0.697539	0.678605	-1.66339	1.07096	0.74363	0.189496	2.91819
1446	M33420	finn-b-IPF	Idiopathic pulmonary fibrosis || id:finn-b-IPF	exposure	Weighted mode	13	-0.410686	0.585586	0.496476	-1.55843	0.737062	0.663195	0.210465	2.08979
1447	M33422	finn-b-IPF	Idiopathic pulmonary fibrosis || id:finn-b-IPF	exposure	MR Egger	33	0.239673	1.71819	0.889964	-3.12798	3.60732	1.27083	0.0438063	36.8673
1448	M33422	finn-b-IPF	Idiopathic pulmonary fibrosis || id:finn-b-IPF	exposure	Weighted median	33	0.237762	1.43684	0.86857	-2.57845	3.05397	1.26841	0.0758916	21.1994
1449	M33422	finn-b-IPF	Idiopathic pulmonary fibrosis || id:finn-b-IPF	exposure	Inverse variance weighted	33	0.469239	0.874789	0.59168	-1.24535	2.18382	1.59878	0.287841	8.8802
1450	M33422	finn-b-IPF	Idiopathic pulmonary fibrosis || id:finn-b-IPF	exposure	Simple mode	33	1.61439	2.15958	0.460193	-2.61839	5.84717	5.0248	0.0729198	346.252
1451	M33422	finn-b-IPF	Idiopathic pulmonary fibrosis || id:finn-b-IPF	exposure	Weighted mode	33	0.531601	1.54666	0.733313	-2.49985	3.56305	1.70165	0.0820974	35.2706
1452	M33423	finn-b-IPF	Idiopathic pulmonary fibrosis || id:finn-b-IPF	exposure	MR Egger	52	-0.0148298	0.0259175	0.569757	-0.0656281	0.0359686	0.98528	0.936479	1.03662
1453	M33423	finn-b-IPF	Idiopathic pulmonary fibrosis || id:finn-b-IPF	exposure	Weighted median	52	0.0054818	0.0197893	0.781773	-0.0333051	0.0442687	1.0055	0.967243	1.04526
1454	M33423	finn-b-IPF	Idiopathic pulmonary fibrosis || id:finn-b-IPF	exposure	Inverse variance weighted	52	0.00584145	0.0136362	0.668376	-0.0208855	0.0325684	1.00586	0.979331	1.0331
1455	M33423	finn-b-IPF	Idiopathic pulmonary fibrosis || id:finn-b-IPF	exposure	Simple mode	52	-0.00209602	0.0369382	0.954971	-0.0744948	0.0703028	0.997906	0.928212	1.07283
1456	M33423	finn-b-IPF	Idiopathic pulmonary fibrosis || id:finn-b-IPF	exposure	Weighted mode	52	0.00239508	0.0268764	0.92934	-0.0502826	0.0550728	1.0024	0.950961	1.05662
1457	M33441	finn-b-IPF	Idiopathic pulmonary fibrosis || id:finn-b-IPF	exposure	MR Egger	10	1.65187	1.10829	0.174437	-0.520386	3.82412	5.2167	0.594291	45.7924
1458	M33441	finn-b-IPF	Idiopathic pulmonary fibrosis || id:finn-b-IPF	exposure	Weighted median	10	0.844149	0.753941	0.262864	-0.633576	2.32187	2.326	0.530691	10.1948
1459	M33441	finn-b-IPF	Idiopathic pulmonary fibrosis || id:finn-b-IPF	exposure	Inverse variance weighted	10	0.455407	0.556145	0.412864	-0.634637	1.54545	1.57682	0.530128	4.69009
1460	M33441	finn-b-IPF	Idiopathic pulmonary fibrosis || id:finn-b-IPF	exposure	Simple mode	10	1.64896	1.2492	0.219415	-0.799463	4.09739	5.20159	0.44957	60.1831
1461	M33441	finn-b-IPF	Idiopathic pulmonary fibrosis || id:finn-b-IPF	exposure	Weighted mode	10	1.20504	0.779791	0.156664	-0.323348	2.73343	3.3369	0.723722	15.3856
1462	M33442	finn-b-IPF	Idiopathic pulmonary fibrosis || id:finn-b-IPF	exposure	MR Egger	27	-1.61875	2.90446	0.582256	-7.31149	4.07399	0.198146	0.000667818	58.7911
1463	M33442	finn-b-IPF	Idiopathic pulmonary fibrosis || id:finn-b-IPF	exposure	Weighted median	27	-0.490106	1.77558	0.782528	-3.97024	2.99002	0.612562	0.018869	19.8861
1464	M33442	finn-b-IPF	Idiopathic pulmonary fibrosis || id:finn-b-IPF	exposure	Inverse variance weighted	27	0.283308	1.17235	0.809045	-2.0145	2.58111	1.32751	0.133387	13.2119
1465	M33442	finn-b-IPF	Idiopathic pulmonary fibrosis || id:finn-b-IPF	exposure	Simple mode	27	-1.32777	2.68758	0.625425	-6.59542	3.93987	0.265067	0.00136661	51.4122
1466	M33442	finn-b-IPF	Idiopathic pulmonary fibrosis || id:finn-b-IPF	exposure	Weighted mode	27	-0.811548	2.21732	0.717323	-5.1575	3.5344	0.44417	0.00575609	34.2745
1467	M33443	finn-b-IPF	Idiopathic pulmonary fibrosis || id:finn-b-IPF	exposure	MR Egger	10	-3.92813	3.43075	0.285315	-10.6524	2.79614	0.0196805	2.36e-05	16.3813
1468	M33443	finn-b-IPF	Idiopathic pulmonary fibrosis || id:finn-b-IPF	exposure	Weighted median	10	-0.446251	1.36951	0.744539	-3.13048	2.23798	0.640023	0.0436967	9.37437
1469	M33443	finn-b-IPF	Idiopathic pulmonary fibrosis || id:finn-b-IPF	exposure	Inverse variance weighted	10	0.238548	0.98403	0.808455	-1.69015	2.16725	1.2694	0.184492	8.7342
1470	M33443	finn-b-IPF	Idiopathic pulmonary fibrosis || id:finn-b-IPF	exposure	Simple mode	10	-1.15925	2.1148	0.596912	-5.30426	2.98575	0.31372	0.00497039	19.8013
1471	M33443	finn-b-IPF	Idiopathic pulmonary fibrosis || id:finn-b-IPF	exposure	Weighted mode	10	-1.15925	1.95747	0.568281	-4.9959	2.67739	0.31372	0.00676562	14.5471
1472	M33447	finn-b-IPF	Idiopathic pulmonary fibrosis || id:finn-b-IPF	exposure	MR Egger	9	0.203857	2.61501	0.940044	-4.92156	5.32927	1.22612	0.00728778	206.288
1473	M33447	finn-b-IPF	Idiopathic pulmonary fibrosis || id:finn-b-IPF	exposure	Weighted median	9	-1.32996	1.19862	0.267182	-3.67926	1.01934	0.264488	0.0252417	2.77136
1474	M33447	finn-b-IPF	Idiopathic pulmonary fibrosis || id:finn-b-IPF	exposure	Inverse variance weighted	9	-0.322359	0.953313	0.735253	-2.19085	1.54613	0.724438	0.111821	4.69329
1475	M33447	finn-b-IPF	Idiopathic pulmonary fibrosis || id:finn-b-IPF	exposure	Simple mode	9	-1.65548	1.84199	0.395033	-5.26578	1.95482	0.191	0.00516538	7.06263
1476	M33447	finn-b-IPF	Idiopathic pulmonary fibrosis || id:finn-b-IPF	exposure	Weighted mode	9	-2.03019	1.57449	0.233276	-5.11619	1.0558	0.13131	0.00599882	2.87428
1477	M33453	finn-b-IPF	Idiopathic pulmonary fibrosis || id:finn-b-IPF	exposure	MR Egger	17	1.71629	1.04877	0.122542	-0.339291	3.77188	5.56387	0.712275	43.4616
1478	M33453	finn-b-IPF	Idiopathic pulmonary fibrosis || id:finn-b-IPF	exposure	Weighted median	17	0.721483	0.752408	0.33761	-0.753236	2.1962	2.05748	0.47084	8.9908
1479	M33453	finn-b-IPF	Idiopathic pulmonary fibrosis || id:finn-b-IPF	exposure	Inverse variance weighted	17	-0.153512	0.536717	0.774863	-1.20548	0.898454	0.85769	0.299549	2.4558
1480	M33453	finn-b-IPF	Idiopathic pulmonary fibrosis || id:finn-b-IPF	exposure	Simple mode	17	-2.55233	1.66025	0.143756	-5.80643	0.701766	0.0778997	0.00300814	2.01731
1481	M33453	finn-b-IPF	Idiopathic pulmonary fibrosis || id:finn-b-IPF	exposure	Weighted mode	17	1.34588	0.823682	0.121782	-0.268534	2.9603	3.84157	0.764499	19.3037
1482	M33477	finn-b-IPF	Idiopathic pulmonary fibrosis || id:finn-b-IPF	exposure	MR Egger	44	1.71999	3.9188	0.662978	-5.96086	9.40084	5.58449	0.00257771	12098.5
1483	M33477	finn-b-IPF	Idiopathic pulmonary fibrosis || id:finn-b-IPF	exposure	Weighted median	44	1.59362	1.23784	0.197946	-0.832536	4.01978	4.92154	0.434945	55.6887
1484	M33477	finn-b-IPF	Idiopathic pulmonary fibrosis || id:finn-b-IPF	exposure	Inverse variance weighted	44	0.387186	0.886027	0.662118	-1.34943	2.1238	1.47283	0.259389	8.36285
1485	M33477	finn-b-IPF	Idiopathic pulmonary fibrosis || id:finn-b-IPF	exposure	Simple mode	44	3.98819	3.0778	0.201959	-2.04429	10.0207	53.9572	0.129472	22486.6
1486	M33477	finn-b-IPF	Idiopathic pulmonary fibrosis || id:finn-b-IPF	exposure	Weighted mode	44	3.67963	2.55354	0.15683	-1.32531	8.68458	39.6319	0.26572	5911.04
1487	M33488	finn-b-IPF	Idiopathic pulmonary fibrosis || id:finn-b-IPF	exposure	MR Egger	16	0.105317	1.00486	0.918015	-1.8642	2.07483	1.11106	0.15502	7.96322
1488	M33488	finn-b-IPF	Idiopathic pulmonary fibrosis || id:finn-b-IPF	exposure	Weighted median	16	0.430468	0.560867	0.442781	-0.66883	1.52977	1.53798	0.512307	4.6171
1489	M33488	finn-b-IPF	Idiopathic pulmonary fibrosis || id:finn-b-IPF	exposure	Inverse variance weighted	16	0.189009	0.409431	0.64434	-0.613475	0.991494	1.20805	0.541466	2.69526
1490	M33488	finn-b-IPF	Idiopathic pulmonary fibrosis || id:finn-b-IPF	exposure	Simple mode	16	-0.869924	0.889788	0.34374	-2.61391	0.874061	0.418983	0.0732477	2.39662
1491	M33488	finn-b-IPF	Idiopathic pulmonary fibrosis || id:finn-b-IPF	exposure	Weighted mode	16	0.404401	0.671226	0.555853	-0.911203	1.72	1.4984	0.40204	5.58455
1492	M33507	finn-b-IPF	Idiopathic pulmonary fibrosis || id:finn-b-IPF	exposure	MR Egger	21	-0.13293	0.208407	0.53119	-0.541407	0.275547	0.875526	0.581929	1.31725
1493	M33507	finn-b-IPF	Idiopathic pulmonary fibrosis || id:finn-b-IPF	exposure	Weighted median	21	-0.138587	0.174196	0.426275	-0.480012	0.202837	0.870587	0.618776	1.22487
1494	M33507	finn-b-IPF	Idiopathic pulmonary fibrosis || id:finn-b-IPF	exposure	Inverse variance weighted	21	-0.0640824	0.16524	0.698153	-0.387952	0.259787	0.937928	0.678445	1.29665
1495	M33507	finn-b-IPF	Idiopathic pulmonary fibrosis || id:finn-b-IPF	exposure	Simple mode	21	0.512594	0.753748	0.504263	-0.964753	1.98994	1.66962	0.381077	7.31509
1496	M33507	finn-b-IPF	Idiopathic pulmonary fibrosis || id:finn-b-IPF	exposure	Weighted mode	21	-0.126777	0.165923	0.453746	-0.451985	0.198432	0.88093	0.636364	1.21949
1497	M33508	finn-b-IPF	Idiopathic pulmonary fibrosis || id:finn-b-IPF	exposure	MR Egger	12	0.402536	0.44354	0.385463	-0.466802	1.27187	1.49561	0.627004	3.56753
1498	M33508	finn-b-IPF	Idiopathic pulmonary fibrosis || id:finn-b-IPF	exposure	Weighted median	12	0.356107	0.335822	0.288961	-0.302104	1.01432	1.42776	0.739261	2.75748
1499	M33508	finn-b-IPF	Idiopathic pulmonary fibrosis || id:finn-b-IPF	exposure	Inverse variance weighted	12	0.31774	0.247541	0.199286	-0.16744	0.802919	1.37402	0.845828	2.23205
1500	M33508	finn-b-IPF	Idiopathic pulmonary fibrosis || id:finn-b-IPF	exposure	Simple mode	12	0.35972	0.508184	0.493761	-0.63632	1.35576	1.43293	0.529236	3.87971
1501	M33508	finn-b-IPF	Idiopathic pulmonary fibrosis || id:finn-b-IPF	exposure	Weighted mode	12	0.351733	0.381926	0.376835	-0.396842	1.10031	1.42153	0.67244	3.00509
1502	M33509	finn-b-IPF	Idiopathic pulmonary fibrosis || id:finn-b-IPF	exposure	MR Egger	8	-1.03695	3.25851	0.761096	-7.42363	5.34973	0.354533	0.000596975	210.551
1503	M33509	finn-b-IPF	Idiopathic pulmonary fibrosis || id:finn-b-IPF	exposure	Weighted median	8	0.693719	1.14515	0.544654	-1.55077	2.93821	2.00114	0.212085	18.882
1504	M33509	finn-b-IPF	Idiopathic pulmonary fibrosis || id:finn-b-IPF	exposure	Inverse variance weighted	8	1.56373	0.990727	0.114482	-0.378098	3.50555	4.77659	0.685164	33.2998
1505	M33509	finn-b-IPF	Idiopathic pulmonary fibrosis || id:finn-b-IPF	exposure	Simple mode	8	1.06746	1.7478	0.560669	-2.35823	4.49314	2.90797	0.0945875	89.4019
1506	M33509	finn-b-IPF	Idiopathic pulmonary fibrosis || id:finn-b-IPF	exposure	Weighted mode	8	0.112582	1.16643	0.925814	-2.17362	2.39878	1.11916	0.113766	11.0097
1507	M33510	finn-b-IPF	Idiopathic pulmonary fibrosis || id:finn-b-IPF	exposure	MR Egger	23	0.0251482	1.13427	0.982521	-2.19803	2.24833	1.02547	0.111022	9.47188
1508	M33510	finn-b-IPF	Idiopathic pulmonary fibrosis || id:finn-b-IPF	exposure	Weighted median	23	0.662002	0.791978	0.40322	-0.890275	2.21428	1.93867	0.410543	9.1548
1509	M33510	finn-b-IPF	Idiopathic pulmonary fibrosis || id:finn-b-IPF	exposure	Inverse variance weighted	23	0.439333	0.672666	0.513678	-0.879093	1.75776	1.55167	0.415159	5.79942
1510	M33510	finn-b-IPF	Idiopathic pulmonary fibrosis || id:finn-b-IPF	exposure	Simple mode	23	0.956206	1.37618	0.494439	-1.74112	3.65353	2.60181	0.175325	38.6107
1511	M33510	finn-b-IPF	Idiopathic pulmonary fibrosis || id:finn-b-IPF	exposure	Weighted mode	23	0.570397	0.702531	0.425537	-0.806563	1.94736	1.76897	0.44639	7.01014
1512	M33515	finn-b-IPF	Idiopathic pulmonary fibrosis || id:finn-b-IPF	exposure	MR Egger	41	4.46463	3.31746	0.186139	-2.03759	10.9668	86.8888	0.130343	57921.6
1513	M33515	finn-b-IPF	Idiopathic pulmonary fibrosis || id:finn-b-IPF	exposure	Weighted median	41	-0.69821	1.16117	0.547642	-2.97411	1.57769	0.497475	0.0510928	4.84376
1514	M33515	finn-b-IPF	Idiopathic pulmonary fibrosis || id:finn-b-IPF	exposure	Inverse variance weighted	41	-0.823912	0.816056	0.312674	-2.42338	0.775558	0.438712	0.0886214	2.1718
1515	M33515	finn-b-IPF	Idiopathic pulmonary fibrosis || id:finn-b-IPF	exposure	Simple mode	41	-1.76286	2.81275	0.534391	-7.27584	3.75012	0.171554	0.000692059	42.5262
1516	M33515	finn-b-IPF	Idiopathic pulmonary fibrosis || id:finn-b-IPF	exposure	Weighted mode	41	-1.1011	2.60386	0.674654	-6.20467	4.00247	0.332506	0.00201997	54.7334
1517	M33531	finn-b-IPF	Idiopathic pulmonary fibrosis || id:finn-b-IPF	exposure	MR Egger	10	-0.509506	1.2307	0.689753	-2.92168	1.90267	0.600793	0.0538433	6.70374
1518	M33531	finn-b-IPF	Idiopathic pulmonary fibrosis || id:finn-b-IPF	exposure	Weighted median	10	-0.553272	0.582751	0.34241	-1.69546	0.58892	0.575065	0.183514	1.80204
1519	M33531	finn-b-IPF	Idiopathic pulmonary fibrosis || id:finn-b-IPF	exposure	Inverse variance weighted	10	-0.582388	0.443007	0.188635	-1.45068	0.285905	0.558563	0.23441	1.33097
1520	M33531	finn-b-IPF	Idiopathic pulmonary fibrosis || id:finn-b-IPF	exposure	Simple mode	10	-0.531843	0.838621	0.54174	-2.17554	1.11185	0.587521	0.113547	3.03999
1521	M33531	finn-b-IPF	Idiopathic pulmonary fibrosis || id:finn-b-IPF	exposure	Weighted mode	10	-0.462566	0.648713	0.493886	-1.73404	0.808912	0.629666	0.176569	2.24546
1522	M33587	finn-b-IPF	Idiopathic pulmonary fibrosis || id:finn-b-IPF	exposure	MR Egger	11	-0.257798	1.88771	0.89438	-3.95772	3.44212	0.772752	0.0191067	31.2532
1523	M33587	finn-b-IPF	Idiopathic pulmonary fibrosis || id:finn-b-IPF	exposure	Weighted median	11	-0.792275	0.916279	0.387222	-2.58818	1.00363	0.452813	0.0751565	2.72817
1524	M33587	finn-b-IPF	Idiopathic pulmonary fibrosis || id:finn-b-IPF	exposure	Inverse variance weighted	11	-0.814402	0.721455	0.258969	-2.22845	0.59965	0.442904	0.107695	1.82148
1525	M33587	finn-b-IPF	Idiopathic pulmonary fibrosis || id:finn-b-IPF	exposure	Simple mode	11	-1.45301	1.43049	0.333698	-4.25678	1.35076	0.233865	0.0141678	3.86035
1526	M33587	finn-b-IPF	Idiopathic pulmonary fibrosis || id:finn-b-IPF	exposure	Weighted mode	11	-1.18313	1.35133	0.401824	-3.83174	1.46547	0.306317	0.0216719	4.32958
1527	M33609	finn-b-IPF	Idiopathic pulmonary fibrosis || id:finn-b-IPF	exposure	MR Egger	19	0.0546701	0.176678	0.760752	-0.291618	0.400958	1.05619	0.747054	1.49325
1528	M33609	finn-b-IPF	Idiopathic pulmonary fibrosis || id:finn-b-IPF	exposure	Weighted median	19	0.0296572	0.14048	0.832799	-0.245684	0.304998	1.0301	0.78217	1.35662
1529	M33609	finn-b-IPF	Idiopathic pulmonary fibrosis || id:finn-b-IPF	exposure	Inverse variance weighted	19	0.0721328	0.109906	0.511622	-0.143283	0.287548	1.0748	0.866509	1.33316
1530	M33609	finn-b-IPF	Idiopathic pulmonary fibrosis || id:finn-b-IPF	exposure	Simple mode	19	0.16846	0.210403	0.433774	-0.24393	0.580849	1.18348	0.783543	1.78756
1531	M33609	finn-b-IPF	Idiopathic pulmonary fibrosis || id:finn-b-IPF	exposure	Weighted mode	19	0.0346762	0.136819	0.802796	-0.233489	0.302842	1.03528	0.791766	1.3537
1532	M33610	finn-b-IPF	Idiopathic pulmonary fibrosis || id:finn-b-IPF	exposure	MR Egger	27	-0.115494	0.14021	0.417887	-0.390307	0.159318	0.890926	0.676849	1.17271
1533	M33610	finn-b-IPF	Idiopathic pulmonary fibrosis || id:finn-b-IPF	exposure	Weighted median	27	-0.222845	0.127605	0.0807471	-0.47295	0.0272605	0.800239	0.623162	1.02764
1534	M33610	finn-b-IPF	Idiopathic pulmonary fibrosis || id:finn-b-IPF	exposure	Inverse variance weighted	27	-0.218849	0.0933331	0.0190365	-0.401782	-0.035916	0.803443	0.669127	0.964721
1535	M33610	finn-b-IPF	Idiopathic pulmonary fibrosis || id:finn-b-IPF	exposure	Simple mode	27	0.0098418	0.188054	0.958662	-0.358743	0.378427	1.00989	0.698554	1.45999
1536	M33610	finn-b-IPF	Idiopathic pulmonary fibrosis || id:finn-b-IPF	exposure	Weighted mode	27	-0.20646	0.122497	0.103873	-0.446555	0.0336346	0.813459	0.639829	1.03421
1537	M33627	finn-b-IPF	Idiopathic pulmonary fibrosis || id:finn-b-IPF	exposure	MR Egger	10	1.82991	3.55613	0.620758	-5.14011	8.79994	6.23335	0.00585704	6633.83
1538	M33627	finn-b-IPF	Idiopathic pulmonary fibrosis || id:finn-b-IPF	exposure	Weighted median	10	-0.405899	1.18284	0.731481	-2.72427	1.91247	0.666378	0.0655944	6.76978
1539	M33627	finn-b-IPF	Idiopathic pulmonary fibrosis || id:finn-b-IPF	exposure	Inverse variance weighted	10	-0.168845	0.98811	0.86432	-2.10554	1.76785	0.84464	0.12178	5.85824
1540	M33627	finn-b-IPF	Idiopathic pulmonary fibrosis || id:finn-b-IPF	exposure	Simple mode	10	-0.876512	2.13364	0.690824	-5.05845	3.30543	0.416232	0.00635539	27.2602
1541	M33627	finn-b-IPF	Idiopathic pulmonary fibrosis || id:finn-b-IPF	exposure	Weighted mode	10	-0.508384	2.16946	0.819967	-4.76052	3.74376	0.601466	0.00856112	42.2564
1542	M33633	finn-b-IPF	Idiopathic pulmonary fibrosis || id:finn-b-IPF	exposure	MR Egger	11	-0.0805127	0.818768	0.923822	-1.6853	1.52427	0.922643	0.185389	4.59181
1543	M33633	finn-b-IPF	Idiopathic pulmonary fibrosis || id:finn-b-IPF	exposure	Weighted median	11	0.256636	0.571822	0.653573	-0.864134	1.37741	1.29257	0.421416	3.96461
1544	M33633	finn-b-IPF	Idiopathic pulmonary fibrosis || id:finn-b-IPF	exposure	Inverse variance weighted	11	0.534392	0.418803	0.201956	-0.286462	1.35525	1.70641	0.750915	3.87772
1545	M33633	finn-b-IPF	Idiopathic pulmonary fibrosis || id:finn-b-IPF	exposure	Simple mode	11	0.320207	0.954325	0.744157	-1.55027	2.19068	1.37741	0.212191	8.94132
1546	M33633	finn-b-IPF	Idiopathic pulmonary fibrosis || id:finn-b-IPF	exposure	Weighted mode	11	-0.04066	0.727835	0.95655	-1.46722	1.3859	0.960156	0.230566	3.99841
1547	M33637	finn-b-IPF	Idiopathic pulmonary fibrosis || id:finn-b-IPF	exposure	MR Egger	10	0.0945756	0.841955	0.91333	-1.55566	1.74481	1.09919	0.211051	5.7248
1548	M33637	finn-b-IPF	Idiopathic pulmonary fibrosis || id:finn-b-IPF	exposure	Weighted median	10	0.0948815	0.586484	0.871479	-1.05463	1.24439	1.09953	0.348323	3.47081
1549	M33637	finn-b-IPF	Idiopathic pulmonary fibrosis || id:finn-b-IPF	exposure	Inverse variance weighted	10	0.479261	0.448238	0.284975	-0.399286	1.35781	1.61488	0.670799	3.88766
1550	M33637	finn-b-IPF	Idiopathic pulmonary fibrosis || id:finn-b-IPF	exposure	Simple mode	10	-0.105494	0.791937	0.896958	-1.65769	1.4467	0.89988	0.190578	4.24908
1551	M33637	finn-b-IPF	Idiopathic pulmonary fibrosis || id:finn-b-IPF	exposure	Weighted mode	10	0.319685	0.691383	0.65478	-1.03543	1.6748	1.37669	0.355075	5.33771
1552	M33638	finn-b-IPF	Idiopathic pulmonary fibrosis || id:finn-b-IPF	exposure	MR Egger	9	-2.89263	1.22068	0.049629	-5.28516	-0.500098	0.0554304	0.00506624	0.606471
1553	M33638	finn-b-IPF	Idiopathic pulmonary fibrosis || id:finn-b-IPF	exposure	Weighted median	9	-0.72083	0.808781	0.372792	-2.30604	0.864381	0.486348	0.099655	2.37354
1554	M33638	finn-b-IPF	Idiopathic pulmonary fibrosis || id:finn-b-IPF	exposure	Inverse variance weighted	9	-0.425511	0.772332	0.581672	-1.93928	1.08826	0.653436	0.143807	2.9691
1555	M33638	finn-b-IPF	Idiopathic pulmonary fibrosis || id:finn-b-IPF	exposure	Simple mode	9	0.0682436	1.28984	0.959102	-2.45985	2.59633	1.07063	0.0854481	13.4145
1556	M33638	finn-b-IPF	Idiopathic pulmonary fibrosis || id:finn-b-IPF	exposure	Weighted mode	9	-0.82653	0.884026	0.377167	-2.55922	0.906162	0.437565	0.077365	2.47481
1557	M33652	finn-b-IPF	Idiopathic pulmonary fibrosis || id:finn-b-IPF	exposure	MR Egger	9	0.369676	0.895149	0.69198	-1.38482	2.12417	1.44727	0.25037	8.36594
1558	M33652	finn-b-IPF	Idiopathic pulmonary fibrosis || id:finn-b-IPF	exposure	Weighted median	9	0.26042	0.610748	0.66982	-0.936646	1.45749	1.29747	0.39194	4.29515
1559	M33652	finn-b-IPF	Idiopathic pulmonary fibrosis || id:finn-b-IPF	exposure	Inverse variance weighted	9	0.216464	0.469538	0.644787	-0.703829	1.13676	1.24168	0.494687	3.11665
1560	M33652	finn-b-IPF	Idiopathic pulmonary fibrosis || id:finn-b-IPF	exposure	Simple mode	9	0.191756	1.02003	0.855565	-1.8075	2.19101	1.21138	0.164064	8.94427
1561	M33652	finn-b-IPF	Idiopathic pulmonary fibrosis || id:finn-b-IPF	exposure	Weighted mode	9	0.265639	0.680806	0.706584	-1.06874	1.60002	1.30426	0.343441	4.95313
1562	M33653	finn-b-IPF	Idiopathic pulmonary fibrosis || id:finn-b-IPF	exposure	MR Egger	12	-0.417601	1.14779	0.723558	-2.66726	1.83206	0.658625	0.0694422	6.24673
1563	M33653	finn-b-IPF	Idiopathic pulmonary fibrosis || id:finn-b-IPF	exposure	Weighted median	12	0.294134	0.68084	0.665729	-1.04031	1.62858	1.34196	0.353345	5.09663
1564	M33653	finn-b-IPF	Idiopathic pulmonary fibrosis || id:finn-b-IPF	exposure	Inverse variance weighted	12	0.232	0.471328	0.62256	-0.691803	1.1558	1.26112	0.500672	3.17657
1565	M33653	finn-b-IPF	Idiopathic pulmonary fibrosis || id:finn-b-IPF	exposure	Simple mode	12	0.588418	1.0017	0.568784	-1.37491	2.55175	1.80114	0.252861	12.8295
1566	M33653	finn-b-IPF	Idiopathic pulmonary fibrosis || id:finn-b-IPF	exposure	Weighted mode	12	0.305323	0.801682	0.710565	-1.26597	1.87662	1.35706	0.281965	6.53139
1567	M33658	finn-b-IPF	Idiopathic pulmonary fibrosis || id:finn-b-IPF	exposure	MR Egger	7	0.390163	1.79803	0.836789	-3.13397	3.9143	1.47722	0.0435445	50.1138
1568	M33658	finn-b-IPF	Idiopathic pulmonary fibrosis || id:finn-b-IPF	exposure	Weighted median	7	-0.823691	0.653405	0.207448	-2.10436	0.456982	0.438809	0.121923	1.5793
1569	M33658	finn-b-IPF	Idiopathic pulmonary fibrosis || id:finn-b-IPF	exposure	Inverse variance weighted	7	-0.59666	0.526689	0.257278	-1.62897	0.435651	0.550648	0.196131	1.54597
1570	M33658	finn-b-IPF	Idiopathic pulmonary fibrosis || id:finn-b-IPF	exposure	Simple mode	7	-1.41244	1.04418	0.224905	-3.45903	0.634141	0.243547	0.0314603	1.8854
1571	M33658	finn-b-IPF	Idiopathic pulmonary fibrosis || id:finn-b-IPF	exposure	Weighted mode	7	-1.3464	1.04891	0.246616	-3.40227	0.709461	0.260174	0.0332976	2.03289
1572	M33666	finn-b-IPF	Idiopathic pulmonary fibrosis || id:finn-b-IPF	exposure	MR Egger	22	0.846463	1.59813	0.602179	-2.28587	3.97879	2.33139	0.101686	53.4524
1573	M33666	finn-b-IPF	Idiopathic pulmonary fibrosis || id:finn-b-IPF	exposure	Weighted median	22	-0.308963	0.941132	0.742693	-2.15358	1.53566	0.734208	0.116068	4.64437
1574	M33666	finn-b-IPF	Idiopathic pulmonary fibrosis || id:finn-b-IPF	exposure	Inverse variance weighted	22	-0.352734	0.663044	0.594732	-1.6523	0.946831	0.702764	0.191609	2.57753
1575	M33666	finn-b-IPF	Idiopathic pulmonary fibrosis || id:finn-b-IPF	exposure	Simple mode	22	1.40722	1.52244	0.365821	-1.57676	4.3912	4.08457	0.206643	80.737
1576	M33666	finn-b-IPF	Idiopathic pulmonary fibrosis || id:finn-b-IPF	exposure	Weighted mode	22	0.491668	1.24097	0.695956	-1.94062	2.92396	1.63504	0.143614	18.6148
1577	M33675	finn-b-IPF	Idiopathic pulmonary fibrosis || id:finn-b-IPF	exposure	MR Egger	8	4.91721	2.94286	0.145777	-0.850788	10.6852	136.621	0.427078	43704.7
1578	M33675	finn-b-IPF	Idiopathic pulmonary fibrosis || id:finn-b-IPF	exposure	Weighted median	8	1.33043	0.812574	0.101567	-0.262213	2.92308	3.78268	0.769348	18.5984
1579	M33675	finn-b-IPF	Idiopathic pulmonary fibrosis || id:finn-b-IPF	exposure	Inverse variance weighted	8	0.747511	0.886707	0.399218	-0.990435	2.48546	2.11174	0.371415	12.0066
1580	M33675	finn-b-IPF	Idiopathic pulmonary fibrosis || id:finn-b-IPF	exposure	Simple mode	8	0.745701	1.93768	0.71178	-3.05215	4.54355	2.10792	0.0472572	94.0242
1581	M33675	finn-b-IPF	Idiopathic pulmonary fibrosis || id:finn-b-IPF	exposure	Weighted mode	8	1.74334	1.05357	0.14196	-0.321653	3.80833	5.71639	0.724949	45.0749
1582	M33683	finn-b-IPF	Idiopathic pulmonary fibrosis || id:finn-b-IPF	exposure	MR Egger	12	0.295435	0.290441	0.33304	-0.27383	0.864699	1.34371	0.760462	2.37429
1583	M33683	finn-b-IPF	Idiopathic pulmonary fibrosis || id:finn-b-IPF	exposure	Weighted median	12	0.164364	0.237813	0.489472	-0.30175	0.630478	1.17864	0.739523	1.87851
1584	M33683	finn-b-IPF	Idiopathic pulmonary fibrosis || id:finn-b-IPF	exposure	Inverse variance weighted	12	0.00384742	0.164513	0.981342	-0.318598	0.326293	1.00385	0.727168	1.38582
1585	M33683	finn-b-IPF	Idiopathic pulmonary fibrosis || id:finn-b-IPF	exposure	Simple mode	12	0.374083	0.319884	0.266945	-0.252889	1.00106	1.45366	0.776554	2.72115
1586	M33683	finn-b-IPF	Idiopathic pulmonary fibrosis || id:finn-b-IPF	exposure	Weighted mode	12	0.221857	0.242243	0.379389	-0.25294	0.696653	1.24839	0.776515	2.00702
1587	M33751	finn-b-IPF	Idiopathic pulmonary fibrosis || id:finn-b-IPF	exposure	MR Egger	27	-0.139422	0.105818	0.199597	-0.346825	0.0679809	0.869861	0.706929	1.07034
1588	M33751	finn-b-IPF	Idiopathic pulmonary fibrosis || id:finn-b-IPF	exposure	Weighted median	27	-0.0872314	0.0949661	0.35833	-0.273365	0.0989022	0.916465	0.760815	1.10396
1589	M33751	finn-b-IPF	Idiopathic pulmonary fibrosis || id:finn-b-IPF	exposure	Inverse variance weighted	27	-0.0560761	0.0805777	0.486475	-0.214008	0.101856	0.945467	0.807342	1.10722
1590	M33751	finn-b-IPF	Idiopathic pulmonary fibrosis || id:finn-b-IPF	exposure	Simple mode	27	0.0620481	0.16768	0.714351	-0.266604	0.390701	1.06401	0.765976	1.47802
1591	M33751	finn-b-IPF	Idiopathic pulmonary fibrosis || id:finn-b-IPF	exposure	Weighted mode	27	-0.103053	0.0774468	0.194865	-0.254848	0.048743	0.902079	0.775034	1.04995
1592	M33782	finn-b-IPF	Idiopathic pulmonary fibrosis || id:finn-b-IPF	exposure	MR Egger	14	0.257369	0.33035	0.451024	-0.390117	0.904855	1.29352	0.676978	2.47157
1593	M33782	finn-b-IPF	Idiopathic pulmonary fibrosis || id:finn-b-IPF	exposure	Weighted median	14	0.018496	0.275391	0.946452	-0.52127	0.558262	1.01867	0.593766	1.74763
1594	M33782	finn-b-IPF	Idiopathic pulmonary fibrosis || id:finn-b-IPF	exposure	Inverse variance weighted	14	-0.0056796	0.194135	0.97666	-0.386184	0.374825	0.994336	0.679645	1.45474
1595	M33782	finn-b-IPF	Idiopathic pulmonary fibrosis || id:finn-b-IPF	exposure	Simple mode	14	-0.526817	0.463314	0.276038	-1.43491	0.38128	0.590482	0.238136	1.46416
1596	M33782	finn-b-IPF	Idiopathic pulmonary fibrosis || id:finn-b-IPF	exposure	Weighted mode	14	-0.0283387	0.323358	0.9315	-0.662121	0.605444	0.972059	0.515756	1.83207
1597	M33801	finn-b-IPF	Idiopathic pulmonary fibrosis || id:finn-b-IPF	exposure	MR Egger	6	-1.13827	1.52026	0.495642	-4.11799	1.84144	0.320371	0.0162772	6.30561
1598	M33801	finn-b-IPF	Idiopathic pulmonary fibrosis || id:finn-b-IPF	exposure	Weighted median	6	-0.800841	0.658848	0.224169	-2.09218	0.490501	0.448951	0.123417	1.63313
1599	M33801	finn-b-IPF	Idiopathic pulmonary fibrosis || id:finn-b-IPF	exposure	Inverse variance weighted	6	-0.621617	0.497436	0.21143	-1.59659	0.353357	0.537075	0.202586	1.42384
1600	M33801	finn-b-IPF	Idiopathic pulmonary fibrosis || id:finn-b-IPF	exposure	Simple mode	6	0.361508	1.00007	0.732512	-1.59863	2.32165	1.43549	0.202173	10.1925
1601	M33801	finn-b-IPF	Idiopathic pulmonary fibrosis || id:finn-b-IPF	exposure	Weighted mode	6	-1.13032	0.899443	0.264379	-2.89323	0.632589	0.32293	0.0553971	1.88248
1602	M33821	finn-b-IPF	Idiopathic pulmonary fibrosis || id:finn-b-IPF	exposure	MR Egger	20	2.87137	1.73488	0.115238	-0.528988	6.27172	17.6612	0.589201	529.39
1603	M33821	finn-b-IPF	Idiopathic pulmonary fibrosis || id:finn-b-IPF	exposure	Weighted median	20	-0.698574	0.785384	0.373752	-2.23793	0.840779	0.497294	0.106679	2.31817
1604	M33821	finn-b-IPF	Idiopathic pulmonary fibrosis || id:finn-b-IPF	exposure	Inverse variance weighted	20	-0.0667442	0.675277	0.921265	-1.39029	1.2568	0.935434	0.249004	3.51415
1605	M33821	finn-b-IPF	Idiopathic pulmonary fibrosis || id:finn-b-IPF	exposure	Simple mode	20	-0.524221	1.28056	0.686848	-3.03412	1.98568	0.592016	0.0481168	7.284
1606	M33821	finn-b-IPF	Idiopathic pulmonary fibrosis || id:finn-b-IPF	exposure	Weighted mode	20	-0.71873	1.14624	0.538099	-2.96535	1.52789	0.487371	0.0515422	4.60846
1607	M33822	finn-b-IPF	Idiopathic pulmonary fibrosis || id:finn-b-IPF	exposure	MR Egger	8	-2.02212	2.75339	0.490392	-7.41877	3.37453	0.132374	0.000599884	29.2105
1608	M33822	finn-b-IPF	Idiopathic pulmonary fibrosis || id:finn-b-IPF	exposure	Weighted median	8	-1.16418	1.22538	0.342083	-3.56593	1.23757	0.312178	0.0282706	3.44721
1609	M33822	finn-b-IPF	Idiopathic pulmonary fibrosis || id:finn-b-IPF	exposure	Inverse variance weighted	8	-1.04902	0.910308	0.249165	-2.83322	0.735184	0.350281	0.0588229	2.08587
1610	M33822	finn-b-IPF	Idiopathic pulmonary fibrosis || id:finn-b-IPF	exposure	Simple mode	8	-1.54866	1.77777	0.412561	-5.03308	1.93576	0.212532	0.00651868	6.92931
1611	M33822	finn-b-IPF	Idiopathic pulmonary fibrosis || id:finn-b-IPF	exposure	Weighted mode	8	-1.12593	1.53348	0.486668	-4.13156	1.8797	0.32435	0.0160578	6.55152
1612	M33833	finn-b-IPF	Idiopathic pulmonary fibrosis || id:finn-b-IPF	exposure	MR Egger	8	0.0639931	1.98095	0.975277	-3.81866	3.94665	1.06609	0.0219572	51.7616
1613	M33833	finn-b-IPF	Idiopathic pulmonary fibrosis || id:finn-b-IPF	exposure	Weighted median	8	-0.287087	0.761623	0.706217	-1.77987	1.20569	0.750446	0.16866	3.33908
1614	M33833	finn-b-IPF	Idiopathic pulmonary fibrosis || id:finn-b-IPF	exposure	Inverse variance weighted	8	-0.0819519	0.584515	0.888498	-1.2276	1.0637	0.921316	0.292994	2.89707
1615	M33833	finn-b-IPF	Idiopathic pulmonary fibrosis || id:finn-b-IPF	exposure	Simple mode	8	-0.25015	1.04598	0.817838	-2.30028	1.79998	0.778684	0.100231	6.0495
1616	M33833	finn-b-IPF	Idiopathic pulmonary fibrosis || id:finn-b-IPF	exposure	Weighted mode	8	-0.324565	0.873968	0.721348	-2.03754	1.38841	0.722842	0.130349	4.00848
1617	M33835	finn-b-IPF	Idiopathic pulmonary fibrosis || id:finn-b-IPF	exposure	MR Egger	9	-0.658397	0.776033	0.424267	-2.17942	0.862628	0.517681	0.113107	2.36938
1618	M33835	finn-b-IPF	Idiopathic pulmonary fibrosis || id:finn-b-IPF	exposure	Weighted median	9	0.0588098	0.38986	0.880095	-0.705317	0.822936	1.06057	0.493952	2.27718
1619	M33835	finn-b-IPF	Idiopathic pulmonary fibrosis || id:finn-b-IPF	exposure	Inverse variance weighted	9	0.0380236	0.289646	0.895557	-0.529683	0.60573	1.03876	0.588791	1.83259
1620	M33835	finn-b-IPF	Idiopathic pulmonary fibrosis || id:finn-b-IPF	exposure	Simple mode	9	-0.425353	0.547438	0.459521	-1.49833	0.647625	0.653539	0.223503	1.911
1621	M33835	finn-b-IPF	Idiopathic pulmonary fibrosis || id:finn-b-IPF	exposure	Weighted mode	9	0.0532457	0.393839	0.895796	-0.718678	0.82517	1.05469	0.487396	2.28227
1622	M33864	finn-b-IPF	Idiopathic pulmonary fibrosis || id:finn-b-IPF	exposure	MR Egger	9	-0.546354	0.64931	0.427909	-1.819	0.726294	0.579057	0.162187	2.0674
1623	M33864	finn-b-IPF	Idiopathic pulmonary fibrosis || id:finn-b-IPF	exposure	Weighted median	9	-0.712824	0.489037	0.144949	-1.67134	0.245688	0.490258	0.187996	1.2785
1624	M33864	finn-b-IPF	Idiopathic pulmonary fibrosis || id:finn-b-IPF	exposure	Inverse variance weighted	9	-0.687117	0.336793	0.0413324	-1.34723	-0.027004	0.503024	0.259959	0.973357
1625	M33864	finn-b-IPF	Idiopathic pulmonary fibrosis || id:finn-b-IPF	exposure	Simple mode	9	-1.12942	0.695918	0.143264	-2.49342	0.234582	0.323221	0.0826271	1.26438
1626	M33864	finn-b-IPF	Idiopathic pulmonary fibrosis || id:finn-b-IPF	exposure	Weighted mode	9	-0.844692	0.516198	0.140399	-1.85644	0.167056	0.42969	0.156228	1.18182
1627	M33871	finn-b-IPF	Idiopathic pulmonary fibrosis || id:finn-b-IPF	exposure	MR Egger	13	0.534114	1.342	0.698246	-2.0962	3.16443	1.70594	0.122922	23.6753
1628	M33871	finn-b-IPF	Idiopathic pulmonary fibrosis || id:finn-b-IPF	exposure	Weighted median	13	0.563853	0.859823	0.511967	-1.1214	2.24911	1.75743	0.325823	9.47926
1629	M33871	finn-b-IPF	Idiopathic pulmonary fibrosis || id:finn-b-IPF	exposure	Inverse variance weighted	13	0.457374	0.630261	0.468029	-0.777938	1.69269	1.57992	0.459352	5.43406
1630	M33871	finn-b-IPF	Idiopathic pulmonary fibrosis || id:finn-b-IPF	exposure	Simple mode	13	2.19268	1.55394	0.183628	-0.853047	5.2384	8.95915	0.426115	188.368
1631	M33871	finn-b-IPF	Idiopathic pulmonary fibrosis || id:finn-b-IPF	exposure	Weighted mode	13	0.470107	1.13598	0.686295	-1.75641	2.69662	1.60017	0.172664	14.8295
1632	M33877	finn-b-IPF	Idiopathic pulmonary fibrosis || id:finn-b-IPF	exposure	MR Egger	27	-0.0625761	0.14047	0.659808	-0.337896	0.212744	0.939342	0.713269	1.23707
1633	M33877	finn-b-IPF	Idiopathic pulmonary fibrosis || id:finn-b-IPF	exposure	Weighted median	27	-0.0460655	0.122749	0.70745	-0.286653	0.194522	0.954979	0.750772	1.21473
1634	M33877	finn-b-IPF	Idiopathic pulmonary fibrosis || id:finn-b-IPF	exposure	Inverse variance weighted	27	-0.0162482	0.0819059	0.842751	-0.176784	0.144287	0.983883	0.837961	1.15522
1635	M33877	finn-b-IPF	Idiopathic pulmonary fibrosis || id:finn-b-IPF	exposure	Simple mode	27	0.240308	0.196184	0.23159	-0.144212	0.624828	1.27164	0.865704	1.86792
1636	M33877	finn-b-IPF	Idiopathic pulmonary fibrosis || id:finn-b-IPF	exposure	Weighted mode	27	0.0291487	0.130264	0.824688	-0.226168	0.284466	1.02958	0.797584	1.32905
1637	M33883	finn-b-IPF	Idiopathic pulmonary fibrosis || id:finn-b-IPF	exposure	MR Egger	14	-0.0174677	0.627193	0.978239	-1.24677	1.21183	0.982684	0.287433	3.35963
1638	M33883	finn-b-IPF	Idiopathic pulmonary fibrosis || id:finn-b-IPF	exposure	Weighted median	14	-0.0838905	0.294044	0.775415	-0.660216	0.492435	0.919532	0.51674	1.6363
1639	M33883	finn-b-IPF	Idiopathic pulmonary fibrosis || id:finn-b-IPF	exposure	Inverse variance weighted	14	0.160473	0.209325	0.443307	-0.249804	0.57075	1.17407	0.778953	1.76959
1640	M33883	finn-b-IPF	Idiopathic pulmonary fibrosis || id:finn-b-IPF	exposure	Simple mode	14	0.702637	0.443533	0.137168	-0.166688	1.57196	2.01907	0.846464	4.81608
1641	M33883	finn-b-IPF	Idiopathic pulmonary fibrosis || id:finn-b-IPF	exposure	Weighted mode	14	-0.0309361	0.38772	0.93762	-0.790867	0.728995	0.969538	0.453451	2.073
1642	M33884	finn-b-IPF	Idiopathic pulmonary fibrosis || id:finn-b-IPF	exposure	MR Egger	13	1.28246	1.20935	0.311668	-1.08787	3.65278	3.60549	0.336934	38.5819
1643	M33884	finn-b-IPF	Idiopathic pulmonary fibrosis || id:finn-b-IPF	exposure	Weighted median	13	0.451103	0.616103	0.464054	-0.756459	1.65867	1.57004	0.469325	5.2523
1644	M33884	finn-b-IPF	Idiopathic pulmonary fibrosis || id:finn-b-IPF	exposure	Inverse variance weighted	13	0.391321	0.634124	0.537166	-0.851562	1.6342	1.47893	0.426748	5.12538
1645	M33884	finn-b-IPF	Idiopathic pulmonary fibrosis || id:finn-b-IPF	exposure	Simple mode	13	0.606219	0.848761	0.48874	-1.05735	2.26979	1.83349	0.347374	9.67737
1646	M33884	finn-b-IPF	Idiopathic pulmonary fibrosis || id:finn-b-IPF	exposure	Weighted mode	13	0.451705	0.567994	0.441907	-0.661563	1.56497	1.57099	0.516044	4.78254
1647	M33885	finn-b-IPF	Idiopathic pulmonary fibrosis || id:finn-b-IPF	exposure	MR Egger	12	0.537882	0.594781	0.387084	-0.627888	1.70365	1.71238	0.533718	5.49398
1648	M33885	finn-b-IPF	Idiopathic pulmonary fibrosis || id:finn-b-IPF	exposure	Weighted median	12	0.376763	0.390784	0.334986	-0.389175	1.1427	1.45756	0.677616	3.13522
1649	M33885	finn-b-IPF	Idiopathic pulmonary fibrosis || id:finn-b-IPF	exposure	Inverse variance weighted	12	0.591365	0.276239	0.0322925	0.0499363	1.13279	1.80645	1.0512	3.10432
1650	M33885	finn-b-IPF	Idiopathic pulmonary fibrosis || id:finn-b-IPF	exposure	Simple mode	12	0.334504	0.650223	0.617119	-0.939934	1.60894	1.39725	0.390654	4.99752
1651	M33885	finn-b-IPF	Idiopathic pulmonary fibrosis || id:finn-b-IPF	exposure	Weighted mode	12	0.183405	0.476015	0.707367	-0.749584	1.11639	1.2013	0.472563	3.05382
1652	M33892	finn-b-IPF	Idiopathic pulmonary fibrosis || id:finn-b-IPF	exposure	MR Egger	29	-0.29849	0.749639	0.69363	-1.76778	1.1708	0.741938	0.170711	3.22458
1653	M33892	finn-b-IPF	Idiopathic pulmonary fibrosis || id:finn-b-IPF	exposure	Weighted median	29	-0.192191	0.731983	0.792888	-1.62688	1.2425	0.82515	0.196543	3.46425
1654	M33892	finn-b-IPF	Idiopathic pulmonary fibrosis || id:finn-b-IPF	exposure	Inverse variance weighted	29	0.218623	0.488167	0.654266	-0.738185	1.17543	1.24436	0.477981	3.23953
1655	M33892	finn-b-IPF	Idiopathic pulmonary fibrosis || id:finn-b-IPF	exposure	Simple mode	29	1.19349	1.49913	0.432659	-1.74481	4.13179	3.29858	0.174679	62.2892
1656	M33892	finn-b-IPF	Idiopathic pulmonary fibrosis || id:finn-b-IPF	exposure	Weighted mode	29	-0.224079	0.643638	0.730336	-1.48561	1.03745	0.799252	0.226364	2.82202
1657	M33901	finn-b-IPF	Idiopathic pulmonary fibrosis || id:finn-b-IPF	exposure	MR Egger	19	0.151899	0.797492	0.851197	-1.41119	1.71498	1.16404	0.243854	5.55658
1658	M33901	finn-b-IPF	Idiopathic pulmonary fibrosis || id:finn-b-IPF	exposure	Weighted median	19	0.239795	0.523749	0.647065	-0.786754	1.26634	1.27099	0.45532	3.54786
1659	M33901	finn-b-IPF	Idiopathic pulmonary fibrosis || id:finn-b-IPF	exposure	Inverse variance weighted	19	-0.00755649	0.368312	0.983631	-0.729447	0.714335	0.992472	0.482175	2.04283
1660	M33901	finn-b-IPF	Idiopathic pulmonary fibrosis || id:finn-b-IPF	exposure	Simple mode	19	0.62482	0.859609	0.476656	-1.06001	2.30965	1.86791	0.346451	10.0709
1661	M33901	finn-b-IPF	Idiopathic pulmonary fibrosis || id:finn-b-IPF	exposure	Weighted mode	19	0.352432	0.572455	0.545833	-0.769581	1.47444	1.42252	0.463207	4.36861
1662	M33910	finn-b-IPF	Idiopathic pulmonary fibrosis || id:finn-b-IPF	exposure	MR Egger	12	-0.92194	1.18648	0.455123	-3.24744	1.40355	0.397746	0.0388738	4.06964
1663	M33910	finn-b-IPF	Idiopathic pulmonary fibrosis || id:finn-b-IPF	exposure	Weighted median	12	-0.605473	0.751345	0.420329	-2.07811	0.867164	0.545816	0.125167	2.38015
1664	M33910	finn-b-IPF	Idiopathic pulmonary fibrosis || id:finn-b-IPF	exposure	Inverse variance weighted	12	-1.13466	0.668398	0.0895876	-2.44472	0.175403	0.321533	0.0867508	1.19173
1665	M33910	finn-b-IPF	Idiopathic pulmonary fibrosis || id:finn-b-IPF	exposure	Simple mode	12	-0.939819	1.23164	0.461477	-3.35383	1.4742	0.390699	0.0349501	4.36752
1666	M33910	finn-b-IPF	Idiopathic pulmonary fibrosis || id:finn-b-IPF	exposure	Weighted mode	12	-0.529979	0.736874	0.487	-1.97425	0.914294	0.588617	0.138865	2.49501
1667	M33935	finn-b-IPF	Idiopathic pulmonary fibrosis || id:finn-b-IPF	exposure	MR Egger	11	-0.00287924	0.84597	0.997359	-1.66098	1.65522	0.997125	0.189953	5.23424
1668	M33935	finn-b-IPF	Idiopathic pulmonary fibrosis || id:finn-b-IPF	exposure	Weighted median	11	-0.578416	0.462502	0.211072	-1.48492	0.328089	0.560786	0.226521	1.38831
1669	M33935	finn-b-IPF	Idiopathic pulmonary fibrosis || id:finn-b-IPF	exposure	Inverse variance weighted	11	-0.307036	0.362653	0.397197	-1.01784	0.403764	0.735624	0.361376	1.49745
1670	M33935	finn-b-IPF	Idiopathic pulmonary fibrosis || id:finn-b-IPF	exposure	Simple mode	11	-0.746548	0.827427	0.388139	-2.36831	0.87521	0.474	0.0936393	2.39938
1671	M33935	finn-b-IPF	Idiopathic pulmonary fibrosis || id:finn-b-IPF	exposure	Weighted mode	11	-0.730601	0.640769	0.280778	-1.98651	0.525306	0.481619	0.137174	1.69098
1672	M33936	finn-b-IPF	Idiopathic pulmonary fibrosis || id:finn-b-IPF	exposure	MR Egger	15	1.1156	0.974979	0.273158	-0.795355	3.02656	3.05141	0.451421	20.6262
1673	M33936	finn-b-IPF	Idiopathic pulmonary fibrosis || id:finn-b-IPF	exposure	Weighted median	15	0.723181	0.672262	0.282042	-0.594452	2.04081	2.06098	0.551865	7.69687
1674	M33936	finn-b-IPF	Idiopathic pulmonary fibrosis || id:finn-b-IPF	exposure	Inverse variance weighted	15	1.22347	0.539984	0.0234666	0.165101	2.28184	3.39896	1.17951	9.79467
1675	M33936	finn-b-IPF	Idiopathic pulmonary fibrosis || id:finn-b-IPF	exposure	Simple mode	15	2.35022	1.43738	0.124311	-0.46705	5.1675	10.4879	0.626849	175.475
1676	M33936	finn-b-IPF	Idiopathic pulmonary fibrosis || id:finn-b-IPF	exposure	Weighted mode	15	0.715065	0.723673	0.339872	-0.703334	2.13346	2.04432	0.494932	8.44407
1677	M33937	finn-b-IPF	Idiopathic pulmonary fibrosis || id:finn-b-IPF	exposure	MR Egger	15	0.731959	1.53434	0.641244	-2.27534	3.73926	2.07915	0.102762	42.0667
1678	M33937	finn-b-IPF	Idiopathic pulmonary fibrosis || id:finn-b-IPF	exposure	Weighted median	15	-0.41893	0.771727	0.587235	-1.93151	1.09365	0.65775	0.144928	2.98516
1679	M33937	finn-b-IPF	Idiopathic pulmonary fibrosis || id:finn-b-IPF	exposure	Inverse variance weighted	15	-1.12685	0.538635	0.0364348	-2.18257	-0.071122	0.324053	0.112751	0.931348
1680	M33937	finn-b-IPF	Idiopathic pulmonary fibrosis || id:finn-b-IPF	exposure	Simple mode	15	-0.179876	1.24443	0.88713	-2.61896	2.25921	0.835373	0.0728786	9.5755
1681	M33937	finn-b-IPF	Idiopathic pulmonary fibrosis || id:finn-b-IPF	exposure	Weighted mode	15	-0.153201	0.88631	0.865241	-1.89037	1.58397	0.857957	0.151016	4.87426
1682	M33939	finn-b-IPF	Idiopathic pulmonary fibrosis || id:finn-b-IPF	exposure	MR Egger	12	-3.33282	2.8784	0.273822	-8.97449	2.30884	0.0356922	0.000126599	10.0627
1683	M33939	finn-b-IPF	Idiopathic pulmonary fibrosis || id:finn-b-IPF	exposure	Weighted median	12	-1.45304	1.26315	0.250009	-3.92882	1.02274	0.233858	0.0196668	2.78081
1684	M33939	finn-b-IPF	Idiopathic pulmonary fibrosis || id:finn-b-IPF	exposure	Inverse variance weighted	12	-0.336637	1.00644	0.738015	-2.30926	1.63599	0.714168	0.0993345	5.13452
1685	M33939	finn-b-IPF	Idiopathic pulmonary fibrosis || id:finn-b-IPF	exposure	Simple mode	12	-1.19214	1.87495	0.537894	-4.86705	2.48277	0.303571	0.00769604	11.9744
1686	M33939	finn-b-IPF	Idiopathic pulmonary fibrosis || id:finn-b-IPF	exposure	Weighted mode	12	-1.53537	1.39867	0.295768	-4.27677	1.20602	0.215376	0.0138875	3.34018
1687	M33941	finn-b-IPF	Idiopathic pulmonary fibrosis || id:finn-b-IPF	exposure	MR Egger	14	0.875689	0.828228	0.311194	-0.747639	2.49902	2.40053	0.473483	12.1705
1688	M33941	finn-b-IPF	Idiopathic pulmonary fibrosis || id:finn-b-IPF	exposure	Weighted median	14	0.475442	0.706874	0.501203	-0.91003	1.86091	1.60873	0.402512	6.42961
1689	M33941	finn-b-IPF	Idiopathic pulmonary fibrosis || id:finn-b-IPF	exposure	Inverse variance weighted	14	0.677719	0.446938	0.129428	-0.198279	1.55372	1.96938	0.820141	4.72901
1690	M33941	finn-b-IPF	Idiopathic pulmonary fibrosis || id:finn-b-IPF	exposure	Simple mode	14	0.437352	1.17809	0.716441	-1.87171	2.74642	1.5486	0.15386	15.5867
1691	M33941	finn-b-IPF	Idiopathic pulmonary fibrosis || id:finn-b-IPF	exposure	Weighted mode	14	0.105526	0.832005	0.901013	-1.5252	1.73626	1.11129	0.217577	5.67605
1692	M33955	finn-b-IPF	Idiopathic pulmonary fibrosis || id:finn-b-IPF	exposure	MR Egger	31	-0.839907	4.6715	0.858565	-9.99605	8.31623	0.431751	4.56e-05	4089.73
1693	M33955	finn-b-IPF	Idiopathic pulmonary fibrosis || id:finn-b-IPF	exposure	Weighted median	31	-1.37035	1.51284	0.365036	-4.33551	1.59482	0.254019	0.0130952	4.92743
1694	M33955	finn-b-IPF	Idiopathic pulmonary fibrosis || id:finn-b-IPF	exposure	Inverse variance weighted	31	-1.81989	1.0605	0.0861492	-3.89846	0.258687	0.162044	0.0202731	1.29523
1695	M33955	finn-b-IPF	Idiopathic pulmonary fibrosis || id:finn-b-IPF	exposure	Simple mode	31	-0.592605	2.8813	0.838436	-6.23996	5.05475	0.552885	0.00194993	156.765
1696	M33955	finn-b-IPF	Idiopathic pulmonary fibrosis || id:finn-b-IPF	exposure	Weighted mode	31	-0.887279	2.69653	0.744408	-6.17247	4.39792	0.411775	0.00208607	81.2814
1697	M33957	finn-b-IPF	Idiopathic pulmonary fibrosis || id:finn-b-IPF	exposure	MR Egger	10	2.83261	2.86533	0.351822	-2.78344	8.44866	16.9897	0.0618255	4668.79
1698	M33957	finn-b-IPF	Idiopathic pulmonary fibrosis || id:finn-b-IPF	exposure	Weighted median	10	0.775192	1.04388	0.457721	-1.27082	2.8212	2.17101	0.280602	16.797
1699	M33957	finn-b-IPF	Idiopathic pulmonary fibrosis || id:finn-b-IPF	exposure	Inverse variance weighted	10	0.299969	0.784281	0.702108	-1.23722	1.83716	1.34982	0.290189	6.27868
1700	M33957	finn-b-IPF	Idiopathic pulmonary fibrosis || id:finn-b-IPF	exposure	Simple mode	10	1.14111	1.68223	0.514623	-2.15606	4.43828	3.13024	0.11578	84.6294
1701	M33957	finn-b-IPF	Idiopathic pulmonary fibrosis || id:finn-b-IPF	exposure	Weighted mode	10	1.37992	1.45536	0.36781	-1.47259	4.23243	3.97457	0.22933	68.8843
1702	M33960	finn-b-IPF	Idiopathic pulmonary fibrosis || id:finn-b-IPF	exposure	MR Egger	15	0.251009	1.87584	0.895601	-3.42563	3.92765	1.28532	0.0325287	50.7875
1703	M33960	finn-b-IPF	Idiopathic pulmonary fibrosis || id:finn-b-IPF	exposure	Weighted median	15	0.245246	1.09026	0.822024	-1.89167	2.38216	1.27794	0.15082	10.8283
1704	M33960	finn-b-IPF	Idiopathic pulmonary fibrosis || id:finn-b-IPF	exposure	Inverse variance weighted	15	0.24836	0.824333	0.763197	-1.36733	1.86405	1.28192	0.254786	6.44982
1705	M33960	finn-b-IPF	Idiopathic pulmonary fibrosis || id:finn-b-IPF	exposure	Simple mode	15	-0.4131	1.73778	0.815544	-3.81915	2.99295	0.661596	0.0219465	19.9444
1706	M33960	finn-b-IPF	Idiopathic pulmonary fibrosis || id:finn-b-IPF	exposure	Weighted mode	15	-0.128077	1.44411	0.930585	-2.95854	2.70238	0.879786	0.0518947	14.9152
1707	M33961	finn-b-IPF	Idiopathic pulmonary fibrosis || id:finn-b-IPF	exposure	MR Egger	13	1.25384	1.55148	0.436129	-1.78707	4.29475	3.50379	0.167451	73.3141
1708	M33961	finn-b-IPF	Idiopathic pulmonary fibrosis || id:finn-b-IPF	exposure	Weighted median	13	0.0115513	1.04922	0.991216	-2.04492	2.06803	1.01162	0.12939	7.90919
1709	M33961	finn-b-IPF	Idiopathic pulmonary fibrosis || id:finn-b-IPF	exposure	Inverse variance weighted	13	0.147679	0.744191	0.842698	-1.31093	1.60629	1.15914	0.269568	4.9843
1710	M33961	finn-b-IPF	Idiopathic pulmonary fibrosis || id:finn-b-IPF	exposure	Simple mode	13	0.0206262	1.67223	0.990361	-3.25695	3.2982	1.02084	0.0385057	27.0639
1711	M33961	finn-b-IPF	Idiopathic pulmonary fibrosis || id:finn-b-IPF	exposure	Weighted mode	13	0.0206262	1.29545	0.987558	-2.51845	2.5597	1.02084	0.0805846	12.9319
1712	M33968	finn-b-IPF	Idiopathic pulmonary fibrosis || id:finn-b-IPF	exposure	MR Egger	19	-0.547237	1.04717	0.608005	-2.59969	1.50521	0.578546	0.074297	4.5051
1713	M33968	finn-b-IPF	Idiopathic pulmonary fibrosis || id:finn-b-IPF	exposure	Weighted median	19	-0.423175	0.648742	0.514208	-1.69471	0.84836	0.654964	0.183653	2.33581
1714	M33968	finn-b-IPF	Idiopathic pulmonary fibrosis || id:finn-b-IPF	exposure	Inverse variance weighted	19	-0.0684435	0.455018	0.880434	-0.960279	0.823392	0.933846	0.382786	2.27821
1715	M33968	finn-b-IPF	Idiopathic pulmonary fibrosis || id:finn-b-IPF	exposure	Simple mode	19	-0.892802	1.21874	0.473257	-3.28152	1.49592	0.409507	0.0375709	4.46345
1716	M33968	finn-b-IPF	Idiopathic pulmonary fibrosis || id:finn-b-IPF	exposure	Weighted mode	19	-0.916102	1.27534	0.481781	-3.41577	1.58357	0.400076	0.0328511	4.8723
1717	M33969	finn-b-IPF	Idiopathic pulmonary fibrosis || id:finn-b-IPF	exposure	MR Egger	10	1.45774	1.12216	0.230115	-0.741697	3.65718	4.29625	0.476305	38.752
1718	M33969	finn-b-IPF	Idiopathic pulmonary fibrosis || id:finn-b-IPF	exposure	Weighted median	10	0.864516	0.717994	0.228562	-0.542753	2.27178	2.37386	0.581146	9.69669
1719	M33969	finn-b-IPF	Idiopathic pulmonary fibrosis || id:finn-b-IPF	exposure	Inverse variance weighted	10	0.553974	0.544213	0.308708	-0.512683	1.62063	1.74015	0.598887	5.05628
1720	M33969	finn-b-IPF	Idiopathic pulmonary fibrosis || id:finn-b-IPF	exposure	Simple mode	10	-0.303937	1.05348	0.779493	-2.36876	1.76088	0.737907	0.0935969	5.81758
1721	M33969	finn-b-IPF	Idiopathic pulmonary fibrosis || id:finn-b-IPF	exposure	Weighted mode	10	0.936601	0.78641	0.264122	-0.604762	2.47796	2.5513	0.546205	11.917
1722	M33971	finn-b-IPF	Idiopathic pulmonary fibrosis || id:finn-b-IPF	exposure	MR Egger	5	-5.85453	7.1439	0.472539	-19.8566	8.14753	0.00286689	2.38e-09	3454.82
1723	M33971	finn-b-IPF	Idiopathic pulmonary fibrosis || id:finn-b-IPF	exposure	Weighted median	5	-0.461499	1.45314	0.750799	-3.30966	2.38666	0.630338	0.0365285	10.8772
1724	M33971	finn-b-IPF	Idiopathic pulmonary fibrosis || id:finn-b-IPF	exposure	Inverse variance weighted	5	-0.754369	1.15344	0.513099	-3.0151	1.50636	0.470307	0.0490408	4.5103
1725	M33971	finn-b-IPF	Idiopathic pulmonary fibrosis || id:finn-b-IPF	exposure	Simple mode	5	0.96122	2.06059	0.665146	-3.07754	4.99998	2.61488	0.0460724	148.41
1726	M33971	finn-b-IPF	Idiopathic pulmonary fibrosis || id:finn-b-IPF	exposure	Weighted mode	5	0.976055	2.05424	0.659467	-3.05025	5.00236	2.65397	0.0473472	148.763
1727	M33972	finn-b-IPF	Idiopathic pulmonary fibrosis || id:finn-b-IPF	exposure	MR Egger	7	3.17509	3.16346	0.361606	-3.0253	9.37547	23.9289	0.0485435	11795.5
1728	M33972	finn-b-IPF	Idiopathic pulmonary fibrosis || id:finn-b-IPF	exposure	Weighted median	7	-0.584051	1.29548	0.652107	-3.1232	1.9551	0.557635	0.0440161	7.0646
1729	M33972	finn-b-IPF	Idiopathic pulmonary fibrosis || id:finn-b-IPF	exposure	Inverse variance weighted	7	0.273775	1.17986	0.816507	-2.03875	2.58631	1.31492	0.130191	13.2806
1730	M33972	finn-b-IPF	Idiopathic pulmonary fibrosis || id:finn-b-IPF	exposure	Simple mode	7	-1.64334	2.10171	0.463999	-5.7627	2.47601	0.193333	0.00314263	11.8938
1731	M33972	finn-b-IPF	Idiopathic pulmonary fibrosis || id:finn-b-IPF	exposure	Weighted mode	7	-2.02887	2.52245	0.451894	-6.97287	2.91514	0.131484	0.000936956	18.4514
1732	M33973	finn-b-IPF	Idiopathic pulmonary fibrosis || id:finn-b-IPF	exposure	MR Egger	12	0.139997	0.456837	0.765549	-0.755403	1.0354	1.15027	0.469821	2.81622
1733	M33973	finn-b-IPF	Idiopathic pulmonary fibrosis || id:finn-b-IPF	exposure	Weighted median	12	0.311676	0.318542	0.327855	-0.312667	0.936018	1.36571	0.731494	2.54981
1734	M33973	finn-b-IPF	Idiopathic pulmonary fibrosis || id:finn-b-IPF	exposure	Inverse variance weighted	12	0.461435	0.278837	0.0979536	-0.0850852	1.00795	1.58635	0.918434	2.73999
1735	M33973	finn-b-IPF	Idiopathic pulmonary fibrosis || id:finn-b-IPF	exposure	Simple mode	12	1.14855	0.8318	0.194749	-0.481778	2.77888	3.15362	0.617684	16.1009
1736	M33973	finn-b-IPF	Idiopathic pulmonary fibrosis || id:finn-b-IPF	exposure	Weighted mode	12	0.296755	0.35394	0.419634	-0.396968	0.990477	1.34549	0.672356	2.69252
1737	M34035	finn-b-IPF	Idiopathic pulmonary fibrosis || id:finn-b-IPF	exposure	MR Egger	5	2.39027	2.52803	0.414154	-2.56467	7.34522	10.9165	0.0769445	1548.78
1738	M34035	finn-b-IPF	Idiopathic pulmonary fibrosis || id:finn-b-IPF	exposure	Weighted median	5	0.922251	1.34837	0.493989	-1.72054	3.56505	2.51495	0.178969	35.3411
1739	M34035	finn-b-IPF	Idiopathic pulmonary fibrosis || id:finn-b-IPF	exposure	Inverse variance weighted	5	0.205691	1.07203	0.847843	-1.89548	2.30686	1.22837	0.150246	10.0429
1740	M34035	finn-b-IPF	Idiopathic pulmonary fibrosis || id:finn-b-IPF	exposure	Simple mode	5	0.996027	1.88311	0.624846	-2.69486	4.68692	2.7075	0.0675517	108.518
1741	M34035	finn-b-IPF	Idiopathic pulmonary fibrosis || id:finn-b-IPF	exposure	Weighted mode	5	1.19315	1.67749	0.516194	-2.09472	4.48103	3.29746	0.123105	88.3254
1742	M34040	finn-b-IPF	Idiopathic pulmonary fibrosis || id:finn-b-IPF	exposure	MR Egger	15	0.208812	0.637071	0.748305	-1.03985	1.45747	1.23221	0.353509	4.29509
1743	M34040	finn-b-IPF	Idiopathic pulmonary fibrosis || id:finn-b-IPF	exposure	Weighted median	15	-0.0438245	0.469583	0.925644	-0.964207	0.876558	0.957122	0.381286	2.40262
1744	M34040	finn-b-IPF	Idiopathic pulmonary fibrosis || id:finn-b-IPF	exposure	Inverse variance weighted	15	-0.235108	0.397979	0.554684	-1.01515	0.54493	0.790485	0.362349	1.72449
1745	M34040	finn-b-IPF	Idiopathic pulmonary fibrosis || id:finn-b-IPF	exposure	Simple mode	15	-2.2593	1.30518	0.105416	-4.81745	0.298853	0.104424	0.00808736	1.34831
1746	M34040	finn-b-IPF	Idiopathic pulmonary fibrosis || id:finn-b-IPF	exposure	Weighted mode	15	0.0381475	0.48977	0.939019	-0.921801	0.998096	1.03888	0.397802	2.71311
1747	M34062	finn-b-IPF	Idiopathic pulmonary fibrosis || id:finn-b-IPF	exposure	MR Egger	27	-1.6568	2.4577	0.506417	-6.4739	3.1603	0.190748	0.00154319	23.5776
1748	M34062	finn-b-IPF	Idiopathic pulmonary fibrosis || id:finn-b-IPF	exposure	Weighted median	27	0.283325	1.5892	0.858502	-2.8315	3.39815	1.32754	0.0589241	29.9088
1749	M34062	finn-b-IPF	Idiopathic pulmonary fibrosis || id:finn-b-IPF	exposure	Inverse variance weighted	27	0.230669	1.13489	0.838938	-1.99372	2.45505	1.25944	0.136188	11.6471
1750	M34062	finn-b-IPF	Idiopathic pulmonary fibrosis || id:finn-b-IPF	exposure	Simple mode	27	0.433803	2.7625	0.876432	-4.98069	5.8483	1.54311	0.00686932	346.643
1751	M34062	finn-b-IPF	Idiopathic pulmonary fibrosis || id:finn-b-IPF	exposure	Weighted mode	27	0.164339	2.1525	0.939727	-4.05455	4.38323	1.17861	0.0173432	80.0965
1752	M34106	finn-b-IPF	Idiopathic pulmonary fibrosis || id:finn-b-IPF	exposure	MR Egger	15	-0.37753	0.749678	0.622975	-1.8469	1.09184	0.685553	0.157726	2.97975
1753	M34106	finn-b-IPF	Idiopathic pulmonary fibrosis || id:finn-b-IPF	exposure	Weighted median	15	-0.580142	0.478476	0.22533	-1.51796	0.357672	0.559819	0.21916	1.43
1754	M34106	finn-b-IPF	Idiopathic pulmonary fibrosis || id:finn-b-IPF	exposure	Inverse variance weighted	15	0.169345	0.350946	0.629423	-0.518509	0.8572	1.18453	0.595408	2.35655
1755	M34106	finn-b-IPF	Idiopathic pulmonary fibrosis || id:finn-b-IPF	exposure	Simple mode	15	1.46041	1.00279	0.167355	-0.505053	3.42587	4.30772	0.603474	30.7494
1756	M34106	finn-b-IPF	Idiopathic pulmonary fibrosis || id:finn-b-IPF	exposure	Weighted mode	15	-0.583463	0.485192	0.249099	-1.53444	0.367514	0.557963	0.215576	1.44414
1757	M34109	finn-b-IPF	Idiopathic pulmonary fibrosis || id:finn-b-IPF	exposure	MR Egger	32	-0.119675	0.0635265	0.0693099	-0.244186	0.00483744	0.887209	0.783342	1.00485
1758	M34109	finn-b-IPF	Idiopathic pulmonary fibrosis || id:finn-b-IPF	exposure	Weighted median	32	-0.0492451	0.0503869	0.328401	-0.148003	0.0495132	0.951948	0.862428	1.05076
1759	M34109	finn-b-IPF	Idiopathic pulmonary fibrosis || id:finn-b-IPF	exposure	Inverse variance weighted	32	-0.0394465	0.0362399	0.276382	-0.110477	0.0315837	0.961321	0.895407	1.03209
1760	M34109	finn-b-IPF	Idiopathic pulmonary fibrosis || id:finn-b-IPF	exposure	Simple mode	32	0.0045355	0.0866664	0.958599	-0.165331	0.174402	1.00455	0.847613	1.19053
1761	M34109	finn-b-IPF	Idiopathic pulmonary fibrosis || id:finn-b-IPF	exposure	Weighted mode	32	-0.0455756	0.0579404	0.437491	-0.159139	0.0679875	0.955447	0.852878	1.07035
1762	M34112	finn-b-IPF	Idiopathic pulmonary fibrosis || id:finn-b-IPF	exposure	MR Egger	18	1.90251	0.625662	0.00778719	0.676211	3.12881	6.70268	1.96641	22.8467
1763	M34112	finn-b-IPF	Idiopathic pulmonary fibrosis || id:finn-b-IPF	exposure	Weighted median	18	0.446618	0.488156	0.360239	-0.510167	1.4034	1.56302	0.600395	4.06903
1764	M34112	finn-b-IPF	Idiopathic pulmonary fibrosis || id:finn-b-IPF	exposure	Inverse variance weighted	18	0.50579	0.329938	0.12528	-0.140889	1.15247	1.65829	0.868585	3.166
1765	M34112	finn-b-IPF	Idiopathic pulmonary fibrosis || id:finn-b-IPF	exposure	Simple mode	18	0.426506	0.84283	0.619327	-1.22544	2.07845	1.5319	0.293628	7.9921
1766	M34112	finn-b-IPF	Idiopathic pulmonary fibrosis || id:finn-b-IPF	exposure	Weighted mode	18	0.552028	0.665028	0.417997	-0.751427	1.85548	1.73677	0.471693	6.39478
1767	M34123	finn-b-IPF	Idiopathic pulmonary fibrosis || id:finn-b-IPF	exposure	MR Egger	21	0.723468	1.84958	0.700036	-2.90171	4.34865	2.06157	0.0549291	77.3737
1768	M34123	finn-b-IPF	Idiopathic pulmonary fibrosis || id:finn-b-IPF	exposure	Weighted median	21	-0.20384	0.965034	0.832711	-2.09531	1.68763	0.815593	0.123033	5.40663
1769	M34123	finn-b-IPF	Idiopathic pulmonary fibrosis || id:finn-b-IPF	exposure	Inverse variance weighted	21	-0.599259	0.67803	0.376791	-1.9282	0.729679	0.549218	0.14541	2.07441
1770	M34123	finn-b-IPF	Idiopathic pulmonary fibrosis || id:finn-b-IPF	exposure	Simple mode	21	0.41001	1.62282	0.803114	-2.77071	3.59073	1.50683	0.0626176	36.2605
1771	M34123	finn-b-IPF	Idiopathic pulmonary fibrosis || id:finn-b-IPF	exposure	Weighted mode	21	0.0449661	1.39211	0.974552	-2.68357	2.7735	1.04599	0.0683191	16.0146
1772	M34214	finn-b-IPF	Idiopathic pulmonary fibrosis || id:finn-b-IPF	exposure	MR Egger	17	-1.83108	1.44034	0.222989	-4.65416	0.991991	0.16024	0.00952194	2.6966
1773	M34214	finn-b-IPF	Idiopathic pulmonary fibrosis || id:finn-b-IPF	exposure	Weighted median	17	0.489843	0.862622	0.570134	-1.2009	2.18058	1.63206	0.300924	8.85146
1774	M34214	finn-b-IPF	Idiopathic pulmonary fibrosis || id:finn-b-IPF	exposure	Inverse variance weighted	17	0.538018	0.639604	0.400251	-0.715606	1.79164	1.71261	0.488896	5.99929
1775	M34214	finn-b-IPF	Idiopathic pulmonary fibrosis || id:finn-b-IPF	exposure	Simple mode	17	-0.374165	1.35297	0.785666	-3.02599	2.27766	0.687864	0.0485097	9.75385
1776	M34214	finn-b-IPF	Idiopathic pulmonary fibrosis || id:finn-b-IPF	exposure	Weighted mode	17	0.176523	0.982992	0.859739	-1.75014	2.10319	1.19306	0.173749	8.19225
1777	M34221	finn-b-IPF	Idiopathic pulmonary fibrosis || id:finn-b-IPF	exposure	MR Egger	10	0.978703	1.97298	0.633196	-2.88833	4.84574	2.661	0.0556691	127.197
1778	M34221	finn-b-IPF	Idiopathic pulmonary fibrosis || id:finn-b-IPF	exposure	Weighted median	10	-1.06118	0.831471	0.201861	-2.69086	0.568503	0.346047	0.0678224	1.76562
1779	M34221	finn-b-IPF	Idiopathic pulmonary fibrosis || id:finn-b-IPF	exposure	Inverse variance weighted	10	-0.857966	0.612809	0.161497	-2.05907	0.343139	0.424024	0.127573	1.40936
1780	M34221	finn-b-IPF	Idiopathic pulmonary fibrosis || id:finn-b-IPF	exposure	Simple mode	10	-1.32957	1.12352	0.266965	-3.53167	0.872523	0.26459	0.0292559	2.39294
1781	M34221	finn-b-IPF	Idiopathic pulmonary fibrosis || id:finn-b-IPF	exposure	Weighted mode	10	-1.27267	0.927851	0.203399	-3.09126	0.545919	0.280083	0.0454448	1.72619
1782	M34244	finn-b-IPF	Idiopathic pulmonary fibrosis || id:finn-b-IPF	exposure	MR Egger	22	2.58184	1.30255	0.0613728	0.0288416	5.13484	13.2215	1.02926	169.838
1783	M34244	finn-b-IPF	Idiopathic pulmonary fibrosis || id:finn-b-IPF	exposure	Weighted median	22	1.86626	0.793151	0.0186245	0.311679	3.42083	6.46405	1.36572	30.5948
1784	M34244	finn-b-IPF	Idiopathic pulmonary fibrosis || id:finn-b-IPF	exposure	Inverse variance weighted	22	0.553375	0.633053	0.382044	-0.68741	1.79416	1.73911	0.502877	6.01442
1785	M34244	finn-b-IPF	Idiopathic pulmonary fibrosis || id:finn-b-IPF	exposure	Simple mode	22	2.56402	1.68782	0.143642	-0.744105	5.87214	12.9879	0.475159	355.009
1786	M34244	finn-b-IPF	Idiopathic pulmonary fibrosis || id:finn-b-IPF	exposure	Weighted mode	22	2.1266	1.12802	0.0733083	-0.0843139	4.33751	8.3863	0.919143	76.517
1787	M34245	finn-b-IPF	Idiopathic pulmonary fibrosis || id:finn-b-IPF	exposure	MR Egger	19	1.05055	1.18954	0.389473	-1.28096	3.38205	2.85922	0.277771	29.4311
1788	M34245	finn-b-IPF	Idiopathic pulmonary fibrosis || id:finn-b-IPF	exposure	Weighted median	19	-0.442585	0.669831	0.508778	-1.75545	0.870284	0.642374	0.172829	2.38759
1789	M34245	finn-b-IPF	Idiopathic pulmonary fibrosis || id:finn-b-IPF	exposure	Inverse variance weighted	19	-0.151915	0.48749	0.755325	-1.1074	0.803566	0.859062	0.330418	2.23349
1790	M34245	finn-b-IPF	Idiopathic pulmonary fibrosis || id:finn-b-IPF	exposure	Simple mode	19	-0.647004	1.20376	0.597516	-3.00638	1.71237	0.523612	0.0494705	5.54208
1791	M34245	finn-b-IPF	Idiopathic pulmonary fibrosis || id:finn-b-IPF	exposure	Weighted mode	19	-0.369509	0.841958	0.665979	-2.01975	1.28073	0.691073	0.132689	3.59926
1792	M34283	finn-b-IPF	Idiopathic pulmonary fibrosis || id:finn-b-IPF	exposure	MR Egger	41	1.79801	1.38794	0.202782	-0.922364	4.51838	6.03761	0.397578	91.6869
1793	M34283	finn-b-IPF	Idiopathic pulmonary fibrosis || id:finn-b-IPF	exposure	Weighted median	41	-1.05409	1.1122	0.343255	-3.23399	1.12582	0.34851	0.0393998	3.08273
1794	M34283	finn-b-IPF	Idiopathic pulmonary fibrosis || id:finn-b-IPF	exposure	Inverse variance weighted	41	-0.481082	0.766675	0.530337	-1.98376	1.0216	0.618114	0.13755	2.77764
1795	M34283	finn-b-IPF	Idiopathic pulmonary fibrosis || id:finn-b-IPF	exposure	Simple mode	41	-1.63784	2.56196	0.526276	-6.65927	3.38359	0.194399	0.00128208	29.4764
1796	M34283	finn-b-IPF	Idiopathic pulmonary fibrosis || id:finn-b-IPF	exposure	Weighted mode	41	-3.09218	2.98785	0.306924	-8.94838	2.76401	0.0454027	0.000129948	15.8633
1797	M34289	finn-b-IPF	Idiopathic pulmonary fibrosis || id:finn-b-IPF	exposure	MR Egger	13	-0.749112	1.55403	0.639222	-3.795	2.29678	0.472786	0.0224828	9.94212
1798	M34289	finn-b-IPF	Idiopathic pulmonary fibrosis || id:finn-b-IPF	exposure	Weighted median	13	0.577404	0.825056	0.48403	-1.03971	2.19451	1.78141	0.353559	8.97563
1799	M34289	finn-b-IPF	Idiopathic pulmonary fibrosis || id:finn-b-IPF	exposure	Inverse variance weighted	13	-0.0130305	0.593375	0.98248	-1.17605	1.14999	0.987054	0.308496	3.15815
1800	M34289	finn-b-IPF	Idiopathic pulmonary fibrosis || id:finn-b-IPF	exposure	Simple mode	13	-0.265203	1.48922	0.86163	-3.18408	2.65368	0.76705	0.0414162	14.2062
1801	M34289	finn-b-IPF	Idiopathic pulmonary fibrosis || id:finn-b-IPF	exposure	Weighted mode	13	0.510672	1.09381	0.648952	-1.63319	2.65454	1.66641	0.195305	14.2184
1802	M34306	finn-b-IPF	Idiopathic pulmonary fibrosis || id:finn-b-IPF	exposure	MR Egger	20	0.637167	1.84357	0.733638	-2.97624	4.25057	1.89112	0.0509843	70.1455
1803	M34306	finn-b-IPF	Idiopathic pulmonary fibrosis || id:finn-b-IPF	exposure	Weighted median	20	-0.931733	1.08445	0.390244	-3.05725	1.19379	0.393871	0.0470166	3.29956
1804	M34306	finn-b-IPF	Idiopathic pulmonary fibrosis || id:finn-b-IPF	exposure	Inverse variance weighted	20	0.0972016	0.79378	0.902539	-1.45861	1.65301	1.10208	0.23256	5.22268
1805	M34306	finn-b-IPF	Idiopathic pulmonary fibrosis || id:finn-b-IPF	exposure	Simple mode	20	-1.34886	1.86555	0.478464	-5.00534	2.30761	0.259535	0.00670208	10.0504
1806	M34306	finn-b-IPF	Idiopathic pulmonary fibrosis || id:finn-b-IPF	exposure	Weighted mode	20	-1.64896	1.48538	0.280799	-4.5603	1.26239	0.192251	0.0104589	3.53386
1807	M34314	finn-b-IPF	Idiopathic pulmonary fibrosis || id:finn-b-IPF	exposure	MR Egger	10	-0.277671	1.0758	0.802842	-2.38625	1.83091	0.757546	0.0919743	6.23953
1808	M34314	finn-b-IPF	Idiopathic pulmonary fibrosis || id:finn-b-IPF	exposure	Weighted median	10	-0.367117	0.418002	0.3798	-1.1864	0.452168	0.692729	0.305318	1.57172
1809	M34314	finn-b-IPF	Idiopathic pulmonary fibrosis || id:finn-b-IPF	exposure	Inverse variance weighted	10	-0.47502	0.338074	0.159998	-1.13764	0.187605	0.621873	0.320573	1.20636
1810	M34314	finn-b-IPF	Idiopathic pulmonary fibrosis || id:finn-b-IPF	exposure	Simple mode	10	-0.655995	0.623672	0.320299	-1.87839	0.566402	0.518925	0.152836	1.76192
1811	M34314	finn-b-IPF	Idiopathic pulmonary fibrosis || id:finn-b-IPF	exposure	Weighted mode	10	-0.406503	0.540728	0.471391	-1.46633	0.653324	0.665975	0.230771	1.92192
1812	M34322	finn-b-IPF	Idiopathic pulmonary fibrosis || id:finn-b-IPF	exposure	MR Egger	38	0.0879588	0.159843	0.585525	-0.225334	0.401251	1.09194	0.79825	1.49369
1813	M34322	finn-b-IPF	Idiopathic pulmonary fibrosis || id:finn-b-IPF	exposure	Weighted median	38	0.0746702	0.145803	0.608559	-0.211104	0.360444	1.07753	0.80969	1.43397
1814	M34322	finn-b-IPF	Idiopathic pulmonary fibrosis || id:finn-b-IPF	exposure	Inverse variance weighted	38	0.0936861	0.0844909	0.267503	-0.0719161	0.259288	1.09821	0.930609	1.29601
1815	M34322	finn-b-IPF	Idiopathic pulmonary fibrosis || id:finn-b-IPF	exposure	Simple mode	38	0.346708	0.236415	0.150954	-0.116665	0.810081	1.4144	0.889883	2.24809
1816	M34322	finn-b-IPF	Idiopathic pulmonary fibrosis || id:finn-b-IPF	exposure	Weighted mode	38	0.0853807	0.130905	0.518281	-0.171192	0.341954	1.08913	0.842659	1.4077
1817	M34327	finn-b-IPF	Idiopathic pulmonary fibrosis || id:finn-b-IPF	exposure	MR Egger	9	0.585957	1.08028	0.604365	-1.53139	2.7033	1.79671	0.216235	14.929
1818	M34327	finn-b-IPF	Idiopathic pulmonary fibrosis || id:finn-b-IPF	exposure	Weighted median	9	0.412948	0.361155	0.252869	-0.294916	1.12081	1.51127	0.744594	3.06734
1819	M34327	finn-b-IPF	Idiopathic pulmonary fibrosis || id:finn-b-IPF	exposure	Inverse variance weighted	9	0.505957	0.264721	0.0559681	-0.0128962	1.02481	1.65857	0.987187	2.78657
1820	M34327	finn-b-IPF	Idiopathic pulmonary fibrosis || id:finn-b-IPF	exposure	Simple mode	9	0.230876	0.513695	0.665039	-0.775965	1.23772	1.2597	0.460259	3.44774
1821	M34327	finn-b-IPF	Idiopathic pulmonary fibrosis || id:finn-b-IPF	exposure	Weighted mode	9	0.296873	0.476989	0.551009	-0.638025	1.23177	1.34564	0.528335	3.42729
1822	M34329	finn-b-IPF	Idiopathic pulmonary fibrosis || id:finn-b-IPF	exposure	MR Egger	12	-0.508308	0.582252	0.403137	-1.64952	0.632906	0.601512	0.192142	1.88308
1823	M34329	finn-b-IPF	Idiopathic pulmonary fibrosis || id:finn-b-IPF	exposure	Weighted median	12	-0.371172	0.35892	0.301072	-1.07466	0.332311	0.689925	0.341415	1.39419
1824	M34329	finn-b-IPF	Idiopathic pulmonary fibrosis || id:finn-b-IPF	exposure	Inverse variance weighted	12	-0.280908	0.266732	0.292272	-0.803703	0.241886	0.755097	0.447668	1.27365
1825	M34329	finn-b-IPF	Idiopathic pulmonary fibrosis || id:finn-b-IPF	exposure	Simple mode	12	-0.284153	0.584569	0.636443	-1.42991	0.861603	0.752652	0.239331	2.36695
1826	M34329	finn-b-IPF	Idiopathic pulmonary fibrosis || id:finn-b-IPF	exposure	Weighted mode	12	-0.494255	0.453892	0.299468	-1.38388	0.395373	0.610025	0.250603	1.48494
1827	M34336	finn-b-IPF	Idiopathic pulmonary fibrosis || id:finn-b-IPF	exposure	MR Egger	20	-0.0312202	0.312052	0.921412	-0.642842	0.580402	0.969262	0.525796	1.78676
1828	M34336	finn-b-IPF	Idiopathic pulmonary fibrosis || id:finn-b-IPF	exposure	Weighted median	20	-0.0883209	0.342231	0.79635	-0.759094	0.582452	0.915467	0.46809	1.79042
1829	M34336	finn-b-IPF	Idiopathic pulmonary fibrosis || id:finn-b-IPF	exposure	Inverse variance weighted	20	0.125331	0.255772	0.624127	-0.375983	0.626645	1.13352	0.686614	1.87132
1830	M34336	finn-b-IPF	Idiopathic pulmonary fibrosis || id:finn-b-IPF	exposure	Simple mode	20	0.433406	0.747961	0.569093	-1.0326	1.89941	1.5425	0.356081	6.68195
1831	M34336	finn-b-IPF	Idiopathic pulmonary fibrosis || id:finn-b-IPF	exposure	Weighted mode	20	0.00635109	0.284294	0.98241	-0.550865	0.563567	1.00637	0.576451	1.75693
1832	M34338	finn-b-IPF	Idiopathic pulmonary fibrosis || id:finn-b-IPF	exposure	MR Egger	41	0.0474431	0.0455264	0.303782	-0.0417887	0.136675	1.04859	0.959072	1.14646
1833	M34338	finn-b-IPF	Idiopathic pulmonary fibrosis || id:finn-b-IPF	exposure	Weighted median	41	0.0551435	0.0434449	0.204343	-0.0300085	0.140295	1.05669	0.970437	1.15061
1834	M34338	finn-b-IPF	Idiopathic pulmonary fibrosis || id:finn-b-IPF	exposure	Inverse variance weighted	41	0.0230797	0.0279543	0.409017	-0.0317107	0.0778701	1.02335	0.968787	1.08098
1835	M34338	finn-b-IPF	Idiopathic pulmonary fibrosis || id:finn-b-IPF	exposure	Simple mode	41	0.0693806	0.0623911	0.272766	-0.052906	0.191667	1.07184	0.948469	1.21127
1836	M34338	finn-b-IPF	Idiopathic pulmonary fibrosis || id:finn-b-IPF	exposure	Weighted mode	41	0.0256541	0.0403888	0.528929	-0.0535079	0.104816	1.02599	0.947898	1.11051
1837	M34339	finn-b-IPF	Idiopathic pulmonary fibrosis || id:finn-b-IPF	exposure	MR Egger	18	0.395767	0.358034	0.285336	-0.30598	1.09751	1.48552	0.736402	2.9967
1838	M34339	finn-b-IPF	Idiopathic pulmonary fibrosis || id:finn-b-IPF	exposure	Weighted median	18	0.0813276	0.245743	0.740686	-0.400329	0.562984	1.08473	0.6701	1.7559
1839	M34339	finn-b-IPF	Idiopathic pulmonary fibrosis || id:finn-b-IPF	exposure	Inverse variance weighted	18	0.178033	0.190805	0.350787	-0.195944	0.55201	1.19486	0.822058	1.73674
1840	M34339	finn-b-IPF	Idiopathic pulmonary fibrosis || id:finn-b-IPF	exposure	Simple mode	18	0.107285	0.407228	0.795369	-0.690881	0.905451	1.11325	0.501134	2.47305
1841	M34339	finn-b-IPF	Idiopathic pulmonary fibrosis || id:finn-b-IPF	exposure	Weighted mode	18	0.142137	0.334804	0.676497	-0.514078	0.798353	1.15273	0.598051	2.22188
1842	M34344	finn-b-IPF	Idiopathic pulmonary fibrosis || id:finn-b-IPF	exposure	MR Egger	12	0.156014	0.393568	0.70013	-0.615379	0.927407	1.16884	0.540436	2.52795
1843	M34344	finn-b-IPF	Idiopathic pulmonary fibrosis || id:finn-b-IPF	exposure	Weighted median	12	0.171006	0.291201	0.55704	-0.399748	0.74176	1.1865	0.670489	2.09963
1844	M34344	finn-b-IPF	Idiopathic pulmonary fibrosis || id:finn-b-IPF	exposure	Inverse variance weighted	12	0.194992	0.219854	0.375124	-0.235922	0.625907	1.2153	0.789842	1.86994
1845	M34344	finn-b-IPF	Idiopathic pulmonary fibrosis || id:finn-b-IPF	exposure	Simple mode	12	0.398511	0.464984	0.409705	-0.512858	1.30988	1.4896	0.598782	3.70573
1846	M34344	finn-b-IPF	Idiopathic pulmonary fibrosis || id:finn-b-IPF	exposure	Weighted mode	12	0.123154	0.318042	0.705978	-0.50021	0.746517	1.13106	0.606404	2.10964
1847	M34350	finn-b-IPF	Idiopathic pulmonary fibrosis || id:finn-b-IPF	exposure	MR Egger	13	-0.0564901	0.544562	0.919247	-1.12383	1.01085	0.945076	0.325032	2.74794
1848	M34350	finn-b-IPF	Idiopathic pulmonary fibrosis || id:finn-b-IPF	exposure	Weighted median	13	-0.224675	0.317521	0.479199	-0.847017	0.397667	0.798776	0.428692	1.48835
1849	M34350	finn-b-IPF	Idiopathic pulmonary fibrosis || id:finn-b-IPF	exposure	Inverse variance weighted	13	-0.198531	0.262982	0.450296	-0.713976	0.316914	0.819934	0.489693	1.37288
1850	M34350	finn-b-IPF	Idiopathic pulmonary fibrosis || id:finn-b-IPF	exposure	Simple mode	13	-0.37137	0.517763	0.486942	-1.38618	0.643445	0.689789	0.250027	1.90303
1851	M34350	finn-b-IPF	Idiopathic pulmonary fibrosis || id:finn-b-IPF	exposure	Weighted mode	13	-0.230617	0.365035	0.539389	-0.946086	0.484852	0.794044	0.388258	1.62394
1852	M34359	finn-b-IPF	Idiopathic pulmonary fibrosis || id:finn-b-IPF	exposure	MR Egger	40	3.85987	1.57083	0.0186787	0.78105	6.93868	47.4591	2.18376	1031.41
1853	M34359	finn-b-IPF	Idiopathic pulmonary fibrosis || id:finn-b-IPF	exposure	Weighted median	40	0.154115	1.05242	0.883575	-1.90862	2.21685	1.16663	0.148285	9.17837
1854	M34359	finn-b-IPF	Idiopathic pulmonary fibrosis || id:finn-b-IPF	exposure	Inverse variance weighted	40	-0.290426	0.720841	0.687022	-1.70327	1.12242	0.747945	0.182086	3.07229
1855	M34359	finn-b-IPF	Idiopathic pulmonary fibrosis || id:finn-b-IPF	exposure	Simple mode	40	-0.224679	2.12445	0.916316	-4.3886	3.93924	0.798773	0.0124181	51.3796
1856	M34359	finn-b-IPF	Idiopathic pulmonary fibrosis || id:finn-b-IPF	exposure	Weighted mode	40	0.783412	1.47207	0.597619	-2.10185	3.66868	2.18893	0.12223	39.2001
1857	M34365	finn-b-IPF	Idiopathic pulmonary fibrosis || id:finn-b-IPF	exposure	MR Egger	55	-0.210337	0.169018	0.218802	-0.541612	0.120937	0.810311	0.58181	1.12855
1858	M34365	finn-b-IPF	Idiopathic pulmonary fibrosis || id:finn-b-IPF	exposure	Weighted median	55	-0.0564526	0.0613629	0.357584	-0.176724	0.0638188	0.945111	0.838011	1.0659
1859	M34365	finn-b-IPF	Idiopathic pulmonary fibrosis || id:finn-b-IPF	exposure	Inverse variance weighted	55	-0.00388441	0.0499107	0.937965	-0.101709	0.0939405	0.996123	0.903292	1.09849
1860	M34365	finn-b-IPF	Idiopathic pulmonary fibrosis || id:finn-b-IPF	exposure	Simple mode	55	-0.0812347	0.13028	0.535554	-0.336583	0.174113	0.921977	0.714207	1.19019
1861	M34365	finn-b-IPF	Idiopathic pulmonary fibrosis || id:finn-b-IPF	exposure	Weighted mode	55	-0.104552	0.100879	0.304625	-0.302274	0.0931694	0.900728	0.739135	1.09765
1862	M34384	finn-b-IPF	Idiopathic pulmonary fibrosis || id:finn-b-IPF	exposure	MR Egger	7	-2.11127	1.19535	0.137614	-4.45416	0.231624	0.121085	0.0116301	1.26065
1863	M34384	finn-b-IPF	Idiopathic pulmonary fibrosis || id:finn-b-IPF	exposure	Weighted median	7	-0.25459	0.39201	0.516049	-1.02293	0.51375	0.775234	0.35954	1.67155
1864	M34384	finn-b-IPF	Idiopathic pulmonary fibrosis || id:finn-b-IPF	exposure	Inverse variance weighted	7	-0.249014	0.334322	0.456372	-0.904285	0.406257	0.779569	0.404831	1.50119
1865	M34384	finn-b-IPF	Idiopathic pulmonary fibrosis || id:finn-b-IPF	exposure	Simple mode	7	-0.141308	0.62663	0.829072	-1.3695	1.08689	0.868222	0.254233	2.96503
1866	M34384	finn-b-IPF	Idiopathic pulmonary fibrosis || id:finn-b-IPF	exposure	Weighted mode	7	-0.261655	0.542899	0.646911	-1.32574	0.802428	0.769776	0.265607	2.23095
1867	M34384	finn-b-IPF	Idiopathic pulmonary fibrosis || id:finn-b-IPF	exposure	MR Egger	6	-1.53349	1.40185	0.33545	-4.28111	1.21413	0.21578	0.0138272	3.36735
1868	M34384	finn-b-IPF	Idiopathic pulmonary fibrosis || id:finn-b-IPF	exposure	Weighted median	6	0.00958247	0.533928	0.985681	-1.03692	1.05608	1.00963	0.354547	2.87508
1869	M34384	finn-b-IPF	Idiopathic pulmonary fibrosis || id:finn-b-IPF	exposure	Inverse variance weighted	6	-0.036326	0.408121	0.929076	-0.836243	0.763591	0.964326	0.433335	2.14597
1870	M34384	finn-b-IPF	Idiopathic pulmonary fibrosis || id:finn-b-IPF	exposure	Simple mode	6	-0.0476258	0.755029	0.952148	-1.52748	1.43223	0.953491	0.217081	4.18804
1871	M34384	finn-b-IPF	Idiopathic pulmonary fibrosis || id:finn-b-IPF	exposure	Weighted mode	6	-0.100283	0.69967	0.891627	-1.47164	1.27107	0.904581	0.22955	3.56466
1872	M34389	finn-b-IPF	Idiopathic pulmonary fibrosis || id:finn-b-IPF	exposure	MR Egger	13	-0.29598	1.03443	0.780096	-2.32346	1.7315	0.743802	0.0979344	5.64911
1873	M34389	finn-b-IPF	Idiopathic pulmonary fibrosis || id:finn-b-IPF	exposure	Weighted median	13	-0.182856	0.564428	0.745963	-1.28913	0.923422	0.832888	0.275509	2.51789
1874	M34389	finn-b-IPF	Idiopathic pulmonary fibrosis || id:finn-b-IPF	exposure	Inverse variance weighted	13	-0.250985	0.551258	0.648897	-1.33145	0.829481	0.778034	0.264094	2.29213
1875	M34389	finn-b-IPF	Idiopathic pulmonary fibrosis || id:finn-b-IPF	exposure	Simple mode	13	-0.952925	1.24683	0.459468	-3.39672	1.49087	0.385612	0.033483	4.44095
1876	M34389	finn-b-IPF	Idiopathic pulmonary fibrosis || id:finn-b-IPF	exposure	Weighted mode	13	-0.203959	0.602965	0.741012	-1.38577	0.977853	0.815496	0.250131	2.65874
1877	M34390	finn-b-IPF	Idiopathic pulmonary fibrosis || id:finn-b-IPF	exposure	MR Egger	10	-1.05971	1.9253	0.597066	-4.83329	2.71387	0.346557	0.00796028	15.0876
1878	M34390	finn-b-IPF	Idiopathic pulmonary fibrosis || id:finn-b-IPF	exposure	Weighted median	10	-0.512351	0.605053	0.397114	-1.69826	0.673553	0.599085	0.183003	1.96119
1879	M34390	finn-b-IPF	Idiopathic pulmonary fibrosis || id:finn-b-IPF	exposure	Inverse variance weighted	10	-0.477533	0.500607	0.340131	-1.45872	0.503657	0.620312	0.232533	1.65476
1880	M34390	finn-b-IPF	Idiopathic pulmonary fibrosis || id:finn-b-IPF	exposure	Simple mode	10	-0.387701	0.83696	0.6542	-2.02814	1.25274	0.678615	0.13158	3.49992
1881	M34390	finn-b-IPF	Idiopathic pulmonary fibrosis || id:finn-b-IPF	exposure	Weighted mode	10	-0.471497	0.648062	0.485385	-1.7417	0.798706	0.624068	0.175222	2.22266
1882	M34395	finn-b-IPF	Idiopathic pulmonary fibrosis || id:finn-b-IPF	exposure	MR Egger	17	-1.08678	0.810964	0.200159	-2.67627	0.502713	0.337302	0.0688195	1.6532
1883	M34395	finn-b-IPF	Idiopathic pulmonary fibrosis || id:finn-b-IPF	exposure	Weighted median	17	0.00455843	0.571119	0.993632	-1.11483	1.12395	1.00457	0.32797	3.07699
1884	M34395	finn-b-IPF	Idiopathic pulmonary fibrosis || id:finn-b-IPF	exposure	Inverse variance weighted	17	-0.323809	0.422033	0.442928	-1.15099	0.503377	0.723389	0.316322	1.6543
1885	M34395	finn-b-IPF	Idiopathic pulmonary fibrosis || id:finn-b-IPF	exposure	Simple mode	17	0.399259	0.796203	0.622881	-1.1613	1.95982	1.49072	0.313079	7.09803
1886	M34395	finn-b-IPF	Idiopathic pulmonary fibrosis || id:finn-b-IPF	exposure	Weighted mode	17	0.152603	0.649538	0.817235	-1.12049	1.4257	1.16486	0.326119	4.16076
1887	M34400	finn-b-IPF	Idiopathic pulmonary fibrosis || id:finn-b-IPF	exposure	MR Egger	11	-1.43752	0.79118	0.102601	-2.98824	0.113192	0.237516	0.0503763	1.11985
1888	M34400	finn-b-IPF	Idiopathic pulmonary fibrosis || id:finn-b-IPF	exposure	Weighted median	11	-1.03013	0.604895	0.0885708	-2.21572	0.155467	0.356961	0.109075	1.1682
1889	M34400	finn-b-IPF	Idiopathic pulmonary fibrosis || id:finn-b-IPF	exposure	Inverse variance weighted	11	-0.913171	0.429468	0.0334797	-1.75493	-0.0714133	0.40125	0.172919	0.931077
1890	M34400	finn-b-IPF	Idiopathic pulmonary fibrosis || id:finn-b-IPF	exposure	Simple mode	11	-0.00826549	1.06893	0.993982	-2.10336	2.08683	0.991769	0.122045	8.05933
1891	M34400	finn-b-IPF	Idiopathic pulmonary fibrosis || id:finn-b-IPF	exposure	Weighted mode	11	-1.00328	0.580487	0.114621	-2.14103	0.134476	0.366675	0.117533	1.14394
1892	M34404	finn-b-IPF	Idiopathic pulmonary fibrosis || id:finn-b-IPF	exposure	MR Egger	10	-0.976322	0.598066	0.141225	-2.14853	0.195888	0.376694	0.116655	1.21639
1893	M34404	finn-b-IPF	Idiopathic pulmonary fibrosis || id:finn-b-IPF	exposure	Weighted median	10	-0.3968	0.272241	0.14497	-0.930393	0.136793	0.672468	0.394399	1.14659
1894	M34404	finn-b-IPF	Idiopathic pulmonary fibrosis || id:finn-b-IPF	exposure	Inverse variance weighted	10	-0.112056	0.195458	0.566443	-0.495153	0.271042	0.893995	0.609478	1.31133
1895	M34404	finn-b-IPF	Idiopathic pulmonary fibrosis || id:finn-b-IPF	exposure	Simple mode	10	-0.490403	0.43437	0.288091	-1.34177	0.360961	0.612379	0.261383	1.43471
1896	M34404	finn-b-IPF	Idiopathic pulmonary fibrosis || id:finn-b-IPF	exposure	Weighted mode	10	-0.490403	0.35463	0.20005	-1.18548	0.204671	0.612379	0.3056	1.22712
1897	M34407	finn-b-IPF	Idiopathic pulmonary fibrosis || id:finn-b-IPF	exposure	MR Egger	19	-0.164654	0.74362	0.827401	-1.62215	1.29284	0.848187	0.197474	3.64312
1898	M34407	finn-b-IPF	Idiopathic pulmonary fibrosis || id:finn-b-IPF	exposure	Weighted median	19	-0.277276	0.636377	0.663047	-1.52457	0.970022	0.757845	0.217714	2.638
1899	M34407	finn-b-IPF	Idiopathic pulmonary fibrosis || id:finn-b-IPF	exposure	Inverse variance weighted	19	0.500231	0.452833	0.269303	-0.387322	1.38778	1.6491	0.678872	4.00597
1900	M34407	finn-b-IPF	Idiopathic pulmonary fibrosis || id:finn-b-IPF	exposure	Simple mode	19	0.848662	1.31483	0.526776	-1.7284	3.42573	2.33652	0.177568	30.745
1901	M34407	finn-b-IPF	Idiopathic pulmonary fibrosis || id:finn-b-IPF	exposure	Weighted mode	19	-0.0737451	0.633681	0.908643	-1.31576	1.16827	0.928908	0.26827	3.21642
1902	M34409	finn-b-IPF	Idiopathic pulmonary fibrosis || id:finn-b-IPF	exposure	MR Egger	6	5.70775	9.43095	0.577694	-12.7769	24.1924	301.193	2.83e-06	32109406763
1903	M34409	finn-b-IPF	Idiopathic pulmonary fibrosis || id:finn-b-IPF	exposure	Weighted median	6	1.70237	1.57776	0.280595	-1.39003	4.79478	5.48696	0.249067	120.878
1904	M34409	finn-b-IPF	Idiopathic pulmonary fibrosis || id:finn-b-IPF	exposure	Inverse variance weighted	6	0.321145	1.3867	0.816857	-2.39678	3.03907	1.37871	0.0910103	20.8859
1905	M34409	finn-b-IPF	Idiopathic pulmonary fibrosis || id:finn-b-IPF	exposure	Simple mode	6	2.16096	2.14699	0.360369	-2.04715	6.36907	8.67948	0.129103	583.516
1906	M34409	finn-b-IPF	Idiopathic pulmonary fibrosis || id:finn-b-IPF	exposure	Weighted mode	6	2.24173	1.97594	0.308022	-1.6311	6.11456	9.40961	0.195714	452.399
1907	M34416	finn-b-IPF	Idiopathic pulmonary fibrosis || id:finn-b-IPF	exposure	MR Egger	12	0.486462	1.68547	0.778766	-2.81706	3.78998	1.62655	0.0597815	44.2557
1908	M34416	finn-b-IPF	Idiopathic pulmonary fibrosis || id:finn-b-IPF	exposure	Weighted median	12	-0.827679	0.844186	0.326866	-2.48228	0.826927	0.437063	0.0835522	2.28628
1909	M34416	finn-b-IPF	Idiopathic pulmonary fibrosis || id:finn-b-IPF	exposure	Inverse variance weighted	12	-0.39677	0.613637	0.517899	-1.5995	0.805959	0.672489	0.201998	2.23884
1910	M34416	finn-b-IPF	Idiopathic pulmonary fibrosis || id:finn-b-IPF	exposure	Simple mode	12	-0.13947	1.31181	0.917243	-2.71061	2.43167	0.869819	0.066496	11.3779
1911	M34416	finn-b-IPF	Idiopathic pulmonary fibrosis || id:finn-b-IPF	exposure	Weighted mode	12	-0.485097	1.07046	0.659236	-2.58319	1.613	0.615638	0.0755326	5.01783
1912	M34419	finn-b-IPF	Idiopathic pulmonary fibrosis || id:finn-b-IPF	exposure	MR Egger	15	4.07233	2.58769	0.139563	-0.999539	9.14419	58.6934	0.368049	9359.93
1913	M34419	finn-b-IPF	Idiopathic pulmonary fibrosis || id:finn-b-IPF	exposure	Weighted median	15	0.932957	1.35249	0.490317	-1.71793	3.58385	2.54201	0.179437	36.0118
1914	M34419	finn-b-IPF	Idiopathic pulmonary fibrosis || id:finn-b-IPF	exposure	Inverse variance weighted	15	1.88091	0.92949	0.0430115	0.0591142	3.70271	6.5595	1.0609	40.5572
1915	M34419	finn-b-IPF	Idiopathic pulmonary fibrosis || id:finn-b-IPF	exposure	Simple mode	15	0.406368	2.03685	0.844734	-3.58585	4.39859	1.50136	0.0277131	81.3358
1916	M34419	finn-b-IPF	Idiopathic pulmonary fibrosis || id:finn-b-IPF	exposure	Weighted mode	15	0.497852	1.82702	0.78922	-3.0831	4.07881	1.64518	0.0458168	59.075
1917	M34420	finn-b-IPF	Idiopathic pulmonary fibrosis || id:finn-b-IPF	exposure	MR Egger	19	-0.288655	0.400438	0.480799	-1.07351	0.496203	0.749271	0.341806	1.64247
1918	M34420	finn-b-IPF	Idiopathic pulmonary fibrosis || id:finn-b-IPF	exposure	Weighted median	19	-0.123933	0.236517	0.600284	-0.587507	0.339641	0.883439	0.555711	1.40444
1919	M34420	finn-b-IPF	Idiopathic pulmonary fibrosis || id:finn-b-IPF	exposure	Inverse variance weighted	19	0.163842	0.193489	0.39712	-0.215397	0.543081	1.17803	0.806222	1.7213
1920	M34420	finn-b-IPF	Idiopathic pulmonary fibrosis || id:finn-b-IPF	exposure	Simple mode	19	1.35225	0.552906	0.0249638	0.268551	2.43594	3.8661	1.30807	11.4266
1921	M34420	finn-b-IPF	Idiopathic pulmonary fibrosis || id:finn-b-IPF	exposure	Weighted mode	19	-0.153862	0.225189	0.503144	-0.595232	0.287507	0.85739	0.551435	1.3331
1922	M34441	finn-b-IPF	Idiopathic pulmonary fibrosis || id:finn-b-IPF	exposure	MR Egger	15	-0.786158	1.10648	0.489941	-2.95485	1.38254	0.455592	0.0520864	3.98499
1923	M34441	finn-b-IPF	Idiopathic pulmonary fibrosis || id:finn-b-IPF	exposure	Weighted median	15	-0.198625	0.561465	0.723517	-1.2991	0.901845	0.819857	0.272778	2.46415
1924	M34441	finn-b-IPF	Idiopathic pulmonary fibrosis || id:finn-b-IPF	exposure	Inverse variance weighted	15	-0.068661	0.417926	0.869503	-0.887796	0.750474	0.933643	0.411562	2.118
1925	M34441	finn-b-IPF	Idiopathic pulmonary fibrosis || id:finn-b-IPF	exposure	Simple mode	15	0.231413	0.87679	0.795678	-1.4871	1.94992	1.26038	0.226028	7.02813
1926	M34441	finn-b-IPF	Idiopathic pulmonary fibrosis || id:finn-b-IPF	exposure	Weighted mode	15	-0.0804204	0.749958	0.916125	-1.55034	1.3895	0.922728	0.212176	4.01283
1927	M34453	finn-b-IPF	Idiopathic pulmonary fibrosis || id:finn-b-IPF	exposure	MR Egger	3	-2.35223	4.65773	0.702283	-11.4814	6.77692	0.0951563	1.03e-05	877.358
1928	M34453	finn-b-IPF	Idiopathic pulmonary fibrosis || id:finn-b-IPF	exposure	Weighted median	3	-4.30017	3.52945	0.223085	-11.2179	2.61756	0.0135663	1.34e-05	13.7023
1929	M34453	finn-b-IPF	Idiopathic pulmonary fibrosis || id:finn-b-IPF	exposure	Inverse variance weighted	3	-4.73742	3.07008	0.122808	-10.7548	1.27993	0.00876123	2.13e-05	3.59639
1930	M34453	finn-b-IPF	Idiopathic pulmonary fibrosis || id:finn-b-IPF	exposure	Simple mode	3	-4.33694	3.98956	0.390565	-12.1565	3.48259	0.0130764	5.25e-06	32.5438
1931	M34453	finn-b-IPF	Idiopathic pulmonary fibrosis || id:finn-b-IPF	exposure	Weighted mode	3	-4.14586	3.78286	0.387449	-11.5603	3.26855	0.0158298	9.54e-06	26.2733
1932	M34456	finn-b-IPF	Idiopathic pulmonary fibrosis || id:finn-b-IPF	exposure	MR Egger	25	-1.04689	1.56812	0.511027	-4.12041	2.02663	0.351027	0.0162379	7.58843
1933	M34456	finn-b-IPF	Idiopathic pulmonary fibrosis || id:finn-b-IPF	exposure	Weighted median	25	-0.13819	0.942772	0.883464	-1.98602	1.70964	0.870933	0.13724	5.52699
1934	M34456	finn-b-IPF	Idiopathic pulmonary fibrosis || id:finn-b-IPF	exposure	Inverse variance weighted	25	0.270479	0.624179	0.664771	-0.952912	1.49387	1.31059	0.385617	4.4543
1935	M34456	finn-b-IPF	Idiopathic pulmonary fibrosis || id:finn-b-IPF	exposure	Simple mode	25	-1.57089	1.6638	0.354497	-4.83194	1.69016	0.20786	0.00797108	5.42033
1936	M34456	finn-b-IPF	Idiopathic pulmonary fibrosis || id:finn-b-IPF	exposure	Weighted mode	25	-0.346721	1.12718	0.761041	-2.556	1.86256	0.707003	0.0776148	6.44018
1937	M34469	finn-b-IPF	Idiopathic pulmonary fibrosis || id:finn-b-IPF	exposure	MR Egger	11	0.980453	0.942497	0.325352	-0.866842	2.82775	2.66566	0.420277	16.9073
1938	M34469	finn-b-IPF	Idiopathic pulmonary fibrosis || id:finn-b-IPF	exposure	Weighted median	11	1.01785	0.714138	0.154076	-0.381863	2.41756	2.76723	0.682588	11.2184
1939	M34469	finn-b-IPF	Idiopathic pulmonary fibrosis || id:finn-b-IPF	exposure	Inverse variance weighted	11	1.21548	0.524325	0.0204398	0.1878	2.24315	3.3719	1.20659	9.42301
1940	M34469	finn-b-IPF	Idiopathic pulmonary fibrosis || id:finn-b-IPF	exposure	Simple mode	11	2.04219	1.04188	0.0784239	9.84e-05	4.08429	7.70748	1.0001	59.3995
1941	M34469	finn-b-IPF	Idiopathic pulmonary fibrosis || id:finn-b-IPF	exposure	Weighted mode	11	1.01875	0.707803	0.180618	-0.36854	2.40605	2.76974	0.691743	11.0901
1942	M34481	finn-b-IPF	Idiopathic pulmonary fibrosis || id:finn-b-IPF	exposure	MR Egger	9	0.0822413	0.719561	0.912214	-1.3281	1.49258	1.08572	0.264981	4.44856
1943	M34481	finn-b-IPF	Idiopathic pulmonary fibrosis || id:finn-b-IPF	exposure	Weighted median	9	-0.28271	0.472701	0.549792	-1.2092	0.643785	0.753739	0.298435	1.90367
1944	M34481	finn-b-IPF	Idiopathic pulmonary fibrosis || id:finn-b-IPF	exposure	Inverse variance weighted	9	-0.295769	0.491898	0.547652	-1.25989	0.66835	0.743959	0.283686	1.95102
1945	M34481	finn-b-IPF	Idiopathic pulmonary fibrosis || id:finn-b-IPF	exposure	Simple mode	9	-0.637201	1.00998	0.545702	-2.61676	1.34236	0.528771	0.0730388	3.82808
1946	M34481	finn-b-IPF	Idiopathic pulmonary fibrosis || id:finn-b-IPF	exposure	Weighted mode	9	-0.286619	0.510447	0.589831	-1.2871	0.713857	0.750797	0.276071	2.04185
1947	M34499	finn-b-IPF	Idiopathic pulmonary fibrosis || id:finn-b-IPF	exposure	MR Egger	7	0.435567	0.692712	0.557094	-0.92215	1.79328	1.54584	0.397663	6.00915
1948	M34499	finn-b-IPF	Idiopathic pulmonary fibrosis || id:finn-b-IPF	exposure	Weighted median	7	0.411807	0.416324	0.322589	-0.404187	1.2278	1.50954	0.667519	3.41372
1949	M34499	finn-b-IPF	Idiopathic pulmonary fibrosis || id:finn-b-IPF	exposure	Inverse variance weighted	7	0.595749	0.407817	0.144064	-0.203573	1.39507	1.81439	0.815811	4.03526
1950	M34499	finn-b-IPF	Idiopathic pulmonary fibrosis || id:finn-b-IPF	exposure	Simple mode	7	0.401204	0.621293	0.54233	-0.81653	1.61894	1.49362	0.441963	5.04773
1951	M34499	finn-b-IPF	Idiopathic pulmonary fibrosis || id:finn-b-IPF	exposure	Weighted mode	7	0.46419	0.447787	0.339868	-0.413472	1.34185	1.59072	0.66135	3.82612
1952	M34513	finn-b-IPF	Idiopathic pulmonary fibrosis || id:finn-b-IPF	exposure	MR Egger	12	-1.06976	0.783935	0.202296	-2.60627	0.466756	0.343092	0.0738094	1.59481
1953	M34513	finn-b-IPF	Idiopathic pulmonary fibrosis || id:finn-b-IPF	exposure	Weighted median	12	-0.653822	0.477976	0.171344	-1.59065	0.28301	0.520054	0.203792	1.32712
1954	M34513	finn-b-IPF	Idiopathic pulmonary fibrosis || id:finn-b-IPF	exposure	Inverse variance weighted	12	-0.428844	0.378921	0.257739	-1.17153	0.313841	0.651261	0.309893	1.36867
1955	M34513	finn-b-IPF	Idiopathic pulmonary fibrosis || id:finn-b-IPF	exposure	Simple mode	12	-0.753107	0.73758	0.329162	-2.19876	0.69255	0.470901	0.11094	1.99881
1956	M34513	finn-b-IPF	Idiopathic pulmonary fibrosis || id:finn-b-IPF	exposure	Weighted mode	12	-0.77387	0.530166	0.172341	-1.813	0.265256	0.461225	0.163165	1.30376
1957	M34516	finn-b-IPF	Idiopathic pulmonary fibrosis || id:finn-b-IPF	exposure	MR Egger	16	-0.00475731	0.144762	0.974248	-0.288491	0.278976	0.995254	0.749394	1.32178
1958	M34516	finn-b-IPF	Idiopathic pulmonary fibrosis || id:finn-b-IPF	exposure	Weighted median	16	-0.100555	0.112722	0.37236	-0.321491	0.12038	0.904335	0.725068	1.12793
1959	M34516	finn-b-IPF	Idiopathic pulmonary fibrosis || id:finn-b-IPF	exposure	Inverse variance weighted	16	-0.0216804	0.0790529	0.783891	-0.176624	0.133263	0.978553	0.838095	1.14255
1960	M34516	finn-b-IPF	Idiopathic pulmonary fibrosis || id:finn-b-IPF	exposure	Simple mode	16	-0.107483	0.192895	0.585604	-0.485558	0.270592	0.898092	0.615354	1.31074
1961	M34516	finn-b-IPF	Idiopathic pulmonary fibrosis || id:finn-b-IPF	exposure	Weighted mode	16	-0.107483	0.16134	0.515404	-0.423709	0.208742	0.898092	0.654615	1.23213
1962	M34527	finn-b-IPF	Idiopathic pulmonary fibrosis || id:finn-b-IPF	exposure	MR Egger	14	1.07138	2.47071	0.672249	-3.77122	5.91398	2.9194	0.0230239	370.177
1963	M34527	finn-b-IPF	Idiopathic pulmonary fibrosis || id:finn-b-IPF	exposure	Weighted median	14	-0.137484	0.989474	0.889493	-2.07685	1.80189	0.871548	0.125324	6.06106
1964	M34527	finn-b-IPF	Idiopathic pulmonary fibrosis || id:finn-b-IPF	exposure	Inverse variance weighted	14	-0.703485	0.705067	0.318397	-2.08542	0.678446	0.494858	0.124255	1.97081
1965	M34527	finn-b-IPF	Idiopathic pulmonary fibrosis || id:finn-b-IPF	exposure	Simple mode	14	-0.594089	1.62331	0.720271	-3.77578	2.5876	0.552065	0.0229193	13.2978
1966	M34527	finn-b-IPF	Idiopathic pulmonary fibrosis || id:finn-b-IPF	exposure	Weighted mode	14	0.38993	1.22921	0.756113	-2.01931	2.79917	1.47688	0.132747	16.4311
1967	M34530	finn-b-IPF	Idiopathic pulmonary fibrosis || id:finn-b-IPF	exposure	MR Egger	10	0.314436	0.571236	0.597042	-0.805186	1.43406	1.36949	0.447005	4.19569
1968	M34530	finn-b-IPF	Idiopathic pulmonary fibrosis || id:finn-b-IPF	exposure	Weighted median	10	0.696922	0.448867	0.120513	-0.182858	1.5767	2.00756	0.832887	4.83897
1969	M34530	finn-b-IPF	Idiopathic pulmonary fibrosis || id:finn-b-IPF	exposure	Inverse variance weighted	10	0.636375	0.376963	0.0913795	-0.102472	1.37522	1.88962	0.902604	3.95596
1970	M34530	finn-b-IPF	Idiopathic pulmonary fibrosis || id:finn-b-IPF	exposure	Simple mode	10	-0.31174	0.716289	0.673656	-1.71567	1.09219	0.732172	0.179844	2.98078
1971	M34530	finn-b-IPF	Idiopathic pulmonary fibrosis || id:finn-b-IPF	exposure	Weighted mode	10	0.878607	0.428659	0.0706521	0.0384354	1.71878	2.40754	1.03918	5.57771
1972	M34533	finn-b-IPF	Idiopathic pulmonary fibrosis || id:finn-b-IPF	exposure	MR Egger	15	1.80571	0.900337	0.0661736	0.041052	3.57037	6.0843	1.04191	35.5298
1973	M34533	finn-b-IPF	Idiopathic pulmonary fibrosis || id:finn-b-IPF	exposure	Weighted median	15	1.05379	0.532096	0.0476519	0.0108865	2.0967	2.86852	1.01095	8.13929
1974	M34533	finn-b-IPF	Idiopathic pulmonary fibrosis || id:finn-b-IPF	exposure	Inverse variance weighted	15	0.693915	0.485868	0.153235	-0.258386	1.64622	2.00154	0.772297	5.18731
1975	M34533	finn-b-IPF	Idiopathic pulmonary fibrosis || id:finn-b-IPF	exposure	Simple mode	15	1.00417	0.808971	0.234894	-0.581413	2.58975	2.72964	0.559108	13.3265
1976	M34533	finn-b-IPF	Idiopathic pulmonary fibrosis || id:finn-b-IPF	exposure	Weighted mode	15	1.05933	0.534773	0.0675987	0.0111724	2.10748	2.88443	1.01124	8.2275
1977	M34534	finn-b-IPF	Idiopathic pulmonary fibrosis || id:finn-b-IPF	exposure	MR Egger	13	0.273416	2.35037	0.909489	-4.33331	4.88014	1.31445	0.0131241	131.649
1978	M34534	finn-b-IPF	Idiopathic pulmonary fibrosis || id:finn-b-IPF	exposure	Weighted median	13	1.04259	0.809614	0.197827	-0.544248	2.62944	2.83657	0.580278	13.866
1979	M34534	finn-b-IPF	Idiopathic pulmonary fibrosis || id:finn-b-IPF	exposure	Inverse variance weighted	13	0.571003	0.736926	0.438431	-0.873372	2.01538	1.77004	0.417541	7.50356
1980	M34534	finn-b-IPF	Idiopathic pulmonary fibrosis || id:finn-b-IPF	exposure	Simple mode	13	1.43856	1.38532	0.319539	-1.27666	4.15378	4.21464	0.278968	63.6745
1981	M34534	finn-b-IPF	Idiopathic pulmonary fibrosis || id:finn-b-IPF	exposure	Weighted mode	13	1.36592	1.20172	0.277879	-0.989447	3.72129	3.91932	0.371782	41.3175
1982	M34535	finn-b-IPF	Idiopathic pulmonary fibrosis || id:finn-b-IPF	exposure	MR Egger	7	-0.00562585	0.173214	0.975347	-0.345125	0.333874	0.99439	0.708132	1.39637
1983	M34535	finn-b-IPF	Idiopathic pulmonary fibrosis || id:finn-b-IPF	exposure	Weighted median	7	-0.00610294	0.105346	0.953802	-0.21258	0.200375	0.993916	0.808495	1.22186
1984	M34535	finn-b-IPF	Idiopathic pulmonary fibrosis || id:finn-b-IPF	exposure	Inverse variance weighted	7	-0.0147456	0.124128	0.905439	-0.258036	0.228545	0.985363	0.772567	1.25677
1985	M34535	finn-b-IPF	Idiopathic pulmonary fibrosis || id:finn-b-IPF	exposure	Simple mode	7	0.405981	0.552686	0.490308	-0.677284	1.48925	1.50077	0.507995	4.43375
1986	M34535	finn-b-IPF	Idiopathic pulmonary fibrosis || id:finn-b-IPF	exposure	Weighted mode	7	-0.0019008	0.100929	0.985585	-0.199722	0.19592	0.998101	0.818958	1.21643
1987	M34539	finn-b-IPF	Idiopathic pulmonary fibrosis || id:finn-b-IPF	exposure	MR Egger	19	0.0684748	0.588703	0.908766	-1.08538	1.22233	1.07087	0.337772	3.3951
1988	M34539	finn-b-IPF	Idiopathic pulmonary fibrosis || id:finn-b-IPF	exposure	Weighted median	19	0.138767	0.523615	0.790996	-0.887519	1.16505	1.14886	0.411676	3.20609
1989	M34539	finn-b-IPF	Idiopathic pulmonary fibrosis || id:finn-b-IPF	exposure	Inverse variance weighted	19	-0.0202578	0.353113	0.954251	-0.712359	0.671843	0.979946	0.490486	1.95784
1990	M34539	finn-b-IPF	Idiopathic pulmonary fibrosis || id:finn-b-IPF	exposure	Simple mode	19	0.234298	0.862413	0.788962	-1.45603	1.92463	1.26402	0.23316	6.85259
1991	M34539	finn-b-IPF	Idiopathic pulmonary fibrosis || id:finn-b-IPF	exposure	Weighted mode	19	0.133817	0.474833	0.781296	-0.796855	1.06449	1.14318	0.450744	2.89936
1992	M34674	finn-b-IPF	Idiopathic pulmonary fibrosis || id:finn-b-IPF	exposure	MR Egger	12	-0.0110698	1.60504	0.994633	-3.15695	3.13481	0.988991	0.0425552	22.9844
1993	M34674	finn-b-IPF	Idiopathic pulmonary fibrosis || id:finn-b-IPF	exposure	Weighted median	12	0.186348	0.659672	0.777571	-1.10661	1.4793	1.20484	0.330678	4.38989
1994	M34674	finn-b-IPF	Idiopathic pulmonary fibrosis || id:finn-b-IPF	exposure	Inverse variance weighted	12	0.194072	0.570893	0.733898	-0.924879	1.31302	1.21418	0.39658	3.71739
1995	M34674	finn-b-IPF	Idiopathic pulmonary fibrosis || id:finn-b-IPF	exposure	Simple mode	12	0.271924	1.09853	0.809054	-1.88119	2.42503	1.31249	0.152409	11.3026
1996	M34674	finn-b-IPF	Idiopathic pulmonary fibrosis || id:finn-b-IPF	exposure	Weighted mode	12	0.0438627	0.870204	0.960703	-1.66174	1.74946	1.04484	0.189809	5.75151
1997	M34732	finn-b-IPF	Idiopathic pulmonary fibrosis || id:finn-b-IPF	exposure	MR Egger	4	-21.069	52.993	0.72936	-124.935	82.7973	7.08e-10	5.51e-55	9.09e+35
1998	M34732	finn-b-IPF	Idiopathic pulmonary fibrosis || id:finn-b-IPF	exposure	Weighted median	4	-0.913539	1.6612	0.58237	-4.16949	2.34242	0.401102	0.0154601	10.4064
[truncated: 453 more rows]
